# Supplementary material for: Genes with stable DNA methylation levels show higher evolutionary conservation than genes with fluctuant DNA methylation levels
Source: PubMed Central journal article supplement (PMC4741891; doi:10.18632/oncotarget.5504), 2015-10-19
Supplement: oncotarget-06-40235-s001.pdf [file oncotarget-06-40235-s001.pdf]

## **SUPPLEMENTARY DATA**

### **SECTION 1: SUPPLEMENTARY TABLES OF THE MANUSCRIPT**

**Supplementary Table S1: Summary statistics for the comparisons of dn/ds in species**

**Supplementary Table S2: Summary statistics for the comparisons of sequence identity in species**

**Supplementary Table S3: Summary statistics for the comparisons of r2 in HapMap population**

**Supplementary Table S4: Summary statistics for the comparisons of r2 in 1000 genomes populations**

**Supplementary Table S5: Full names and abbreviations**

## **SECTION 2: THE DETAILED GO ANNOTATION RESULTS OF THE HUMAN SM GENES**

**Supplementary Table S2-1: BP results of the human SM genes**

**Supplementary Table S2-2: MF results of the human SM genes**

**Supplementary Table S2-3: CC results of the human FM genes**

### **SECTION 3: THE DETAILED GO ANNOTATION RESULTS OF THE HUMAN FM GENES**

**Supplementary Table S3-1: BP results of the human FM genes**

**Supplementary Table S3-2: MF results of the human FM genes**

**Supplementary Table S3-3: CC results of the human SM genes**

**SECTION 4: COMPARISON OF EVOLUTIONARY CONSERVATION BETWEEN SM (TOP 15%) AND FM GENES (BOTTOM 15%)**

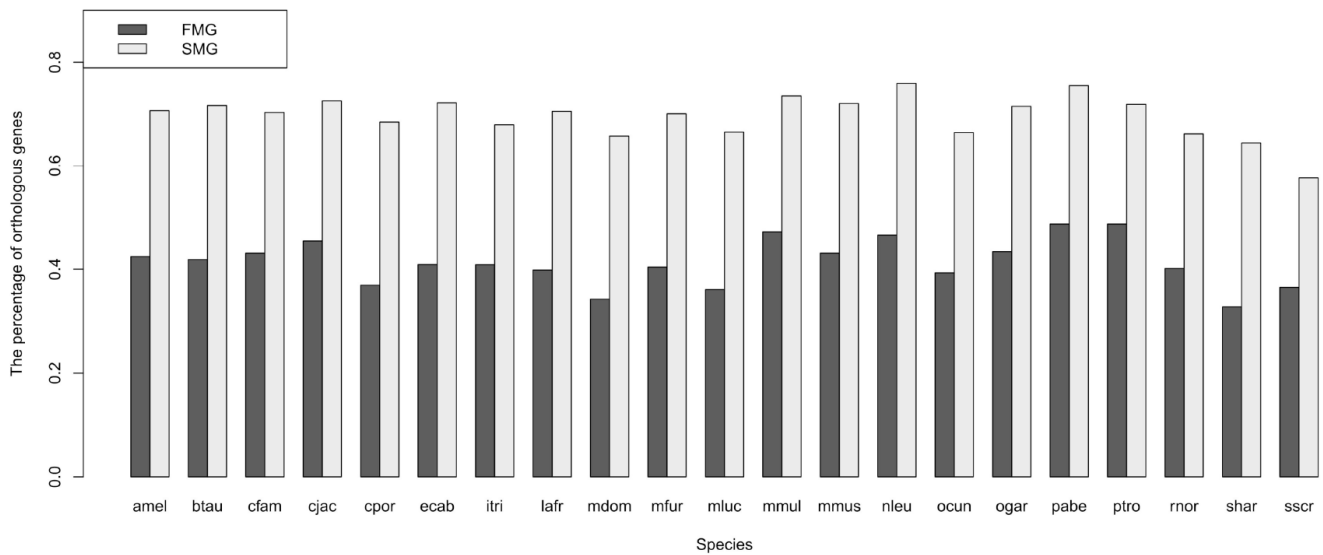

**Supplementary Figure S4-1: The bar plots of the SM genes against the FM genes in the percentage of orthologous genes for each of the 21 species.**

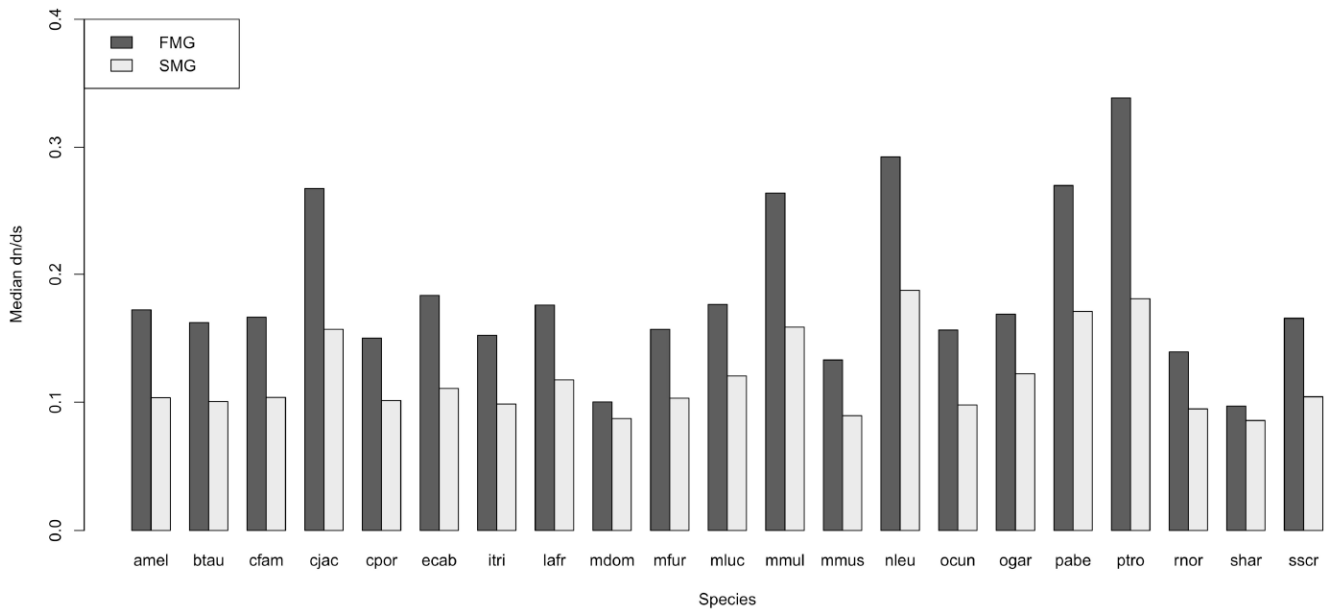

**Supplementary Figure S4-2: The bar plots of the SM genes against the FM genes in the evolutionary rate for each of the 21 species.**

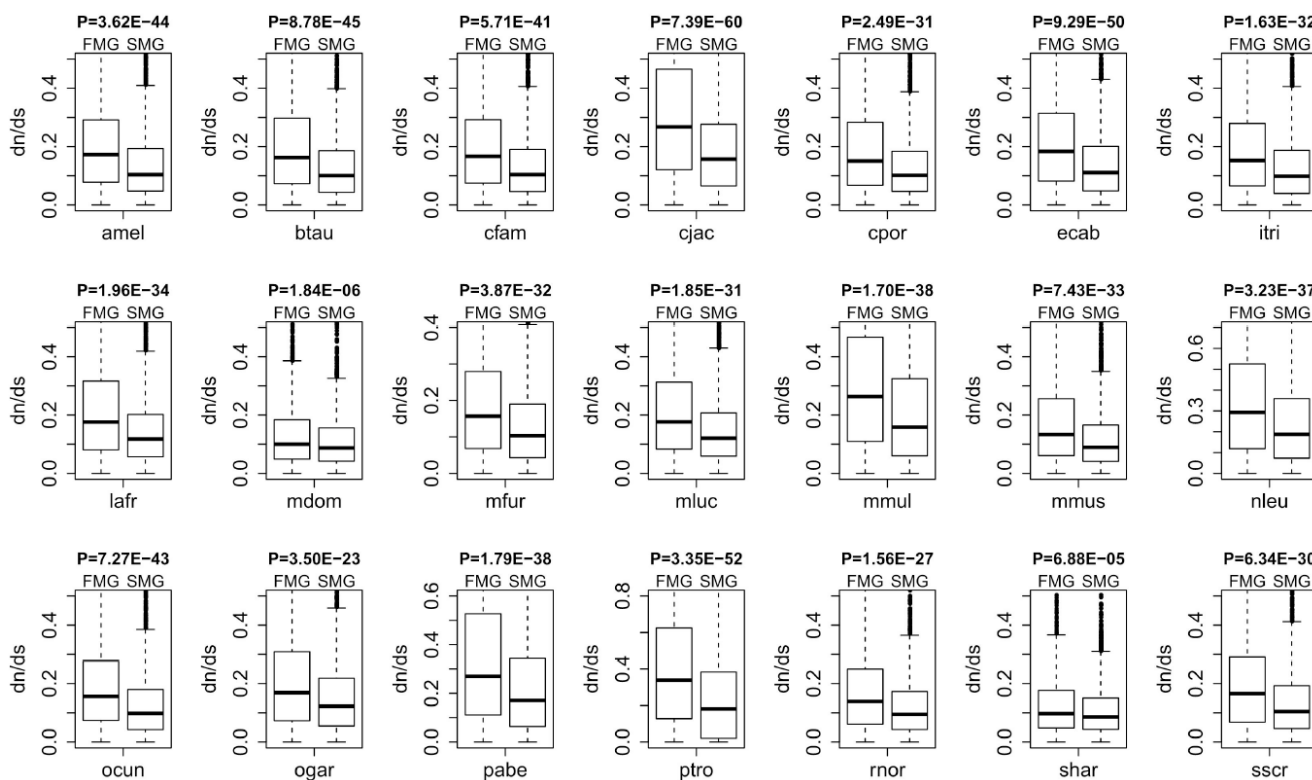

Supplementary Figure S4-3: The box plots of the SM genes against the FM genes in the evolutionary rate for each of the 21 species.

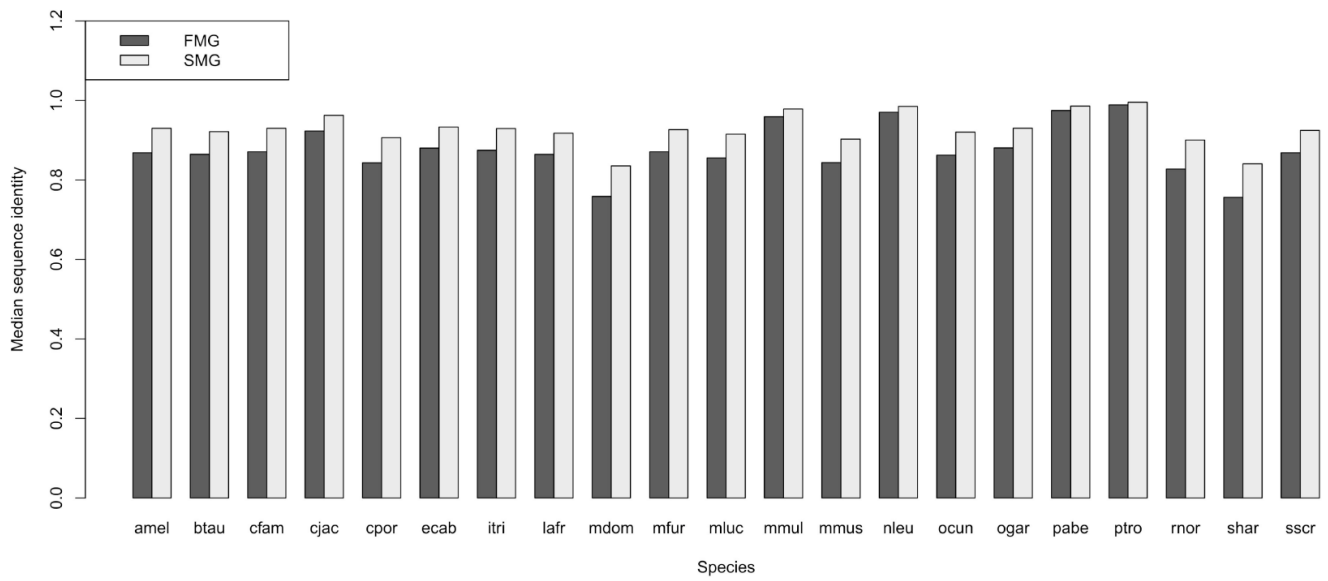

**Supplementary Figure S4-4: The bar plots of the SM genes against the FM genes in the sequence identity for each of the 21 species.**

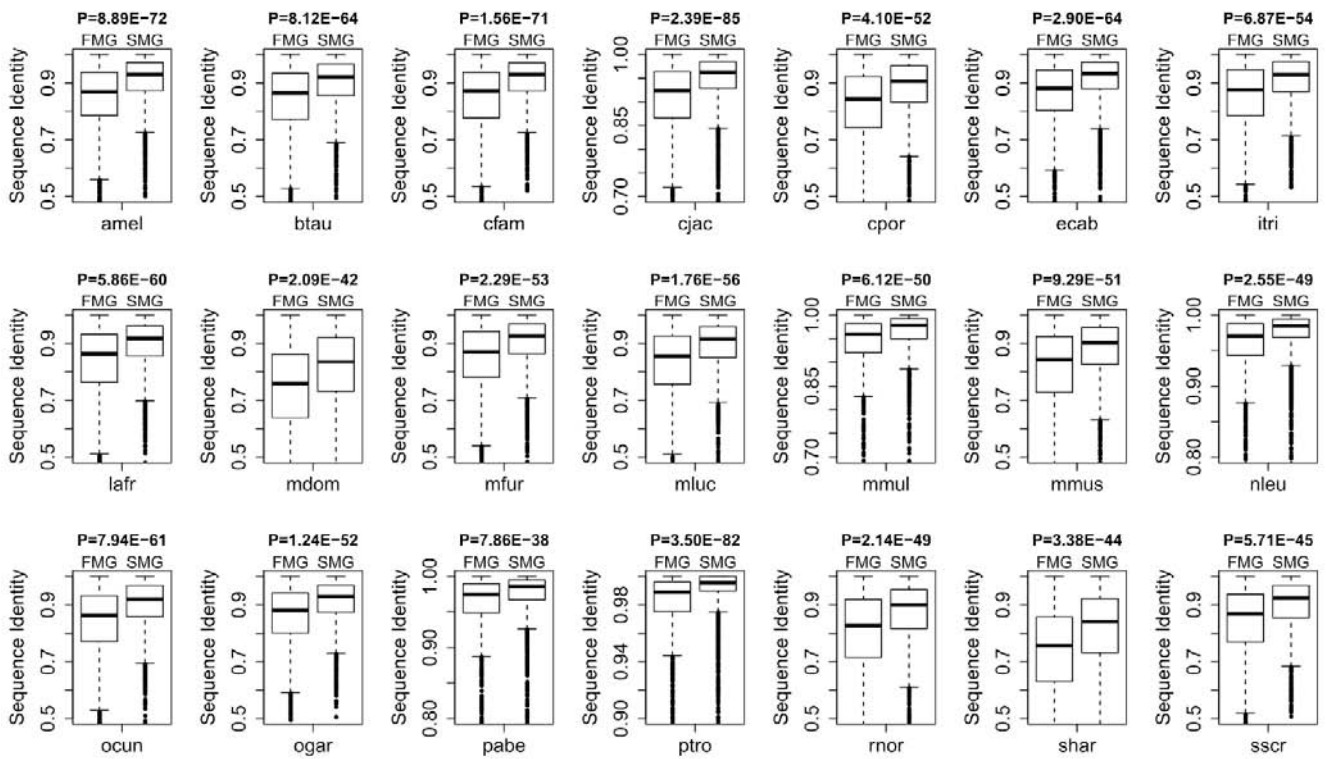

Supplementary Figure S4-5: The box plots of the SM genes against the FM genes in the sequence identity for each of the 21 species.



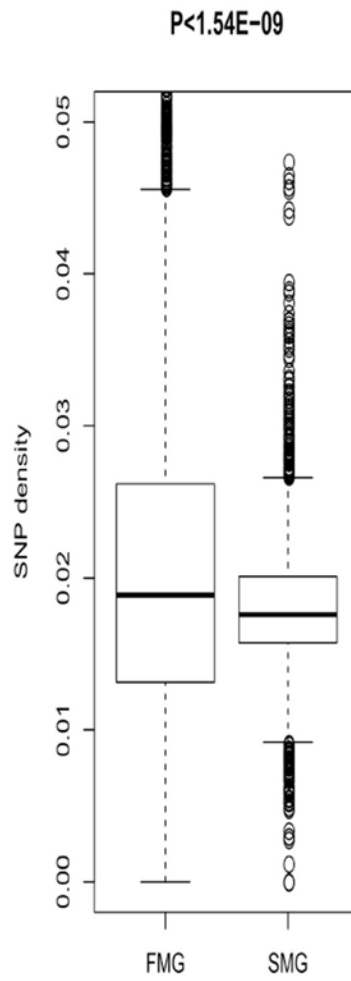

Supplementary Figure S4-6: The box plot of the SM genes against the FM genes in the SNP density.

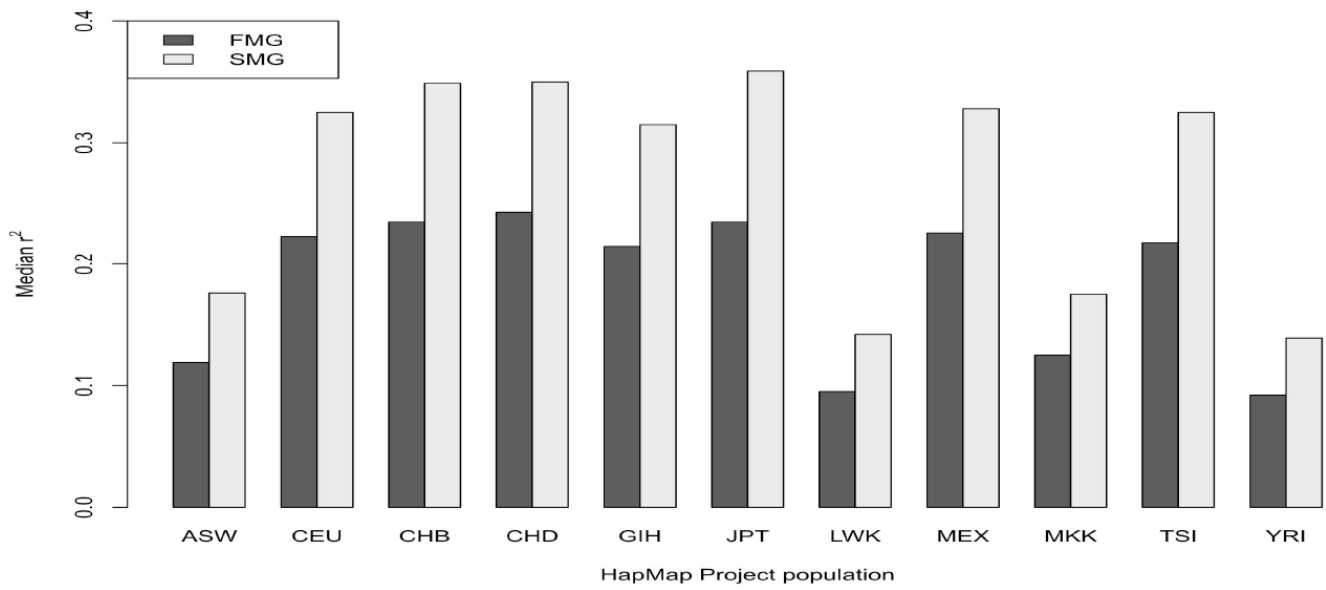

Supplementary Figure S4-7: The bar plots of the SM genes against the FM genes in the LD coefficient  $r^2$  for each of the 11 populations of HapMap Project.

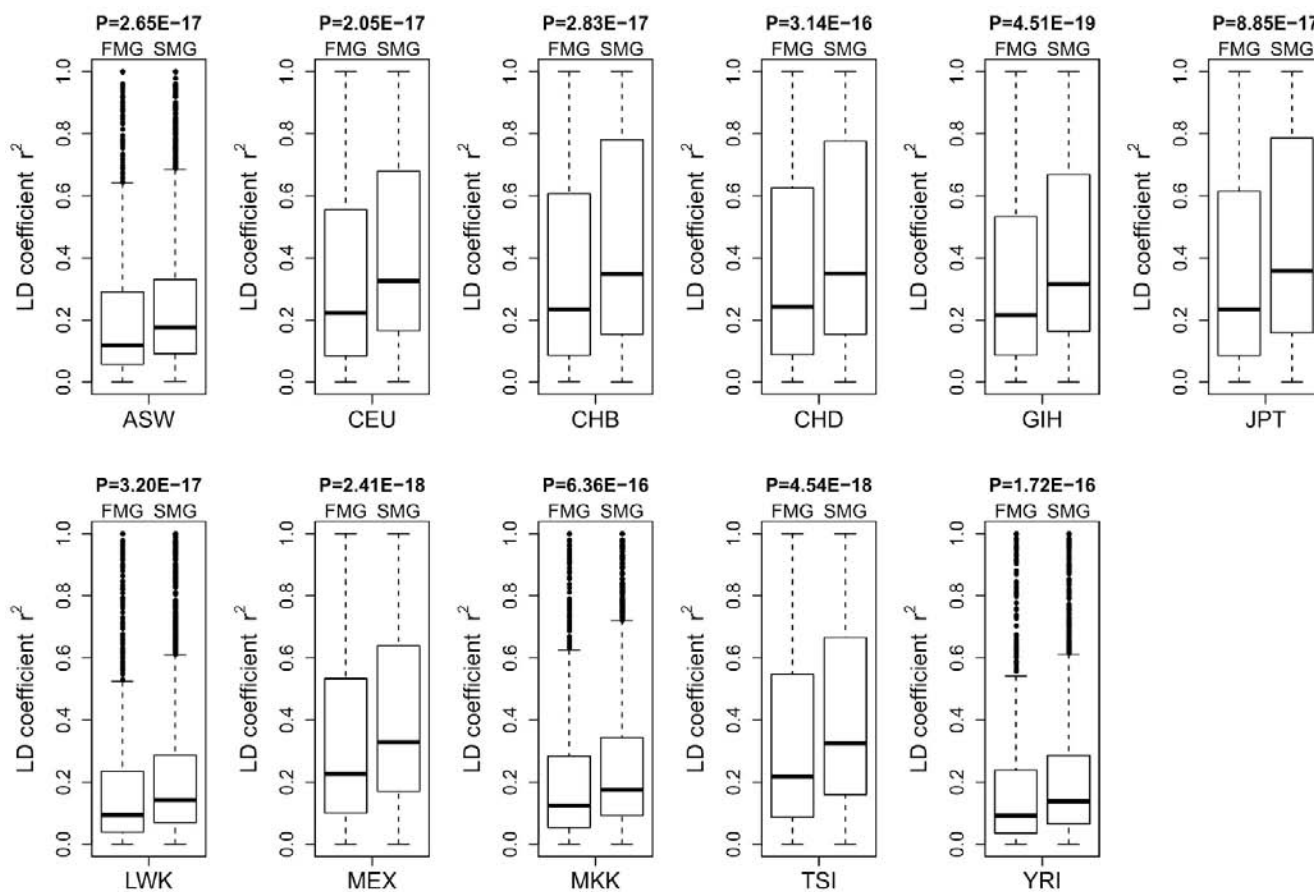

Supplementary Figure S4-8: The box plots of the SM genes against the FM genes in the LD coefficient  $r^2$  for each of the 11 populations of HapMap Project.

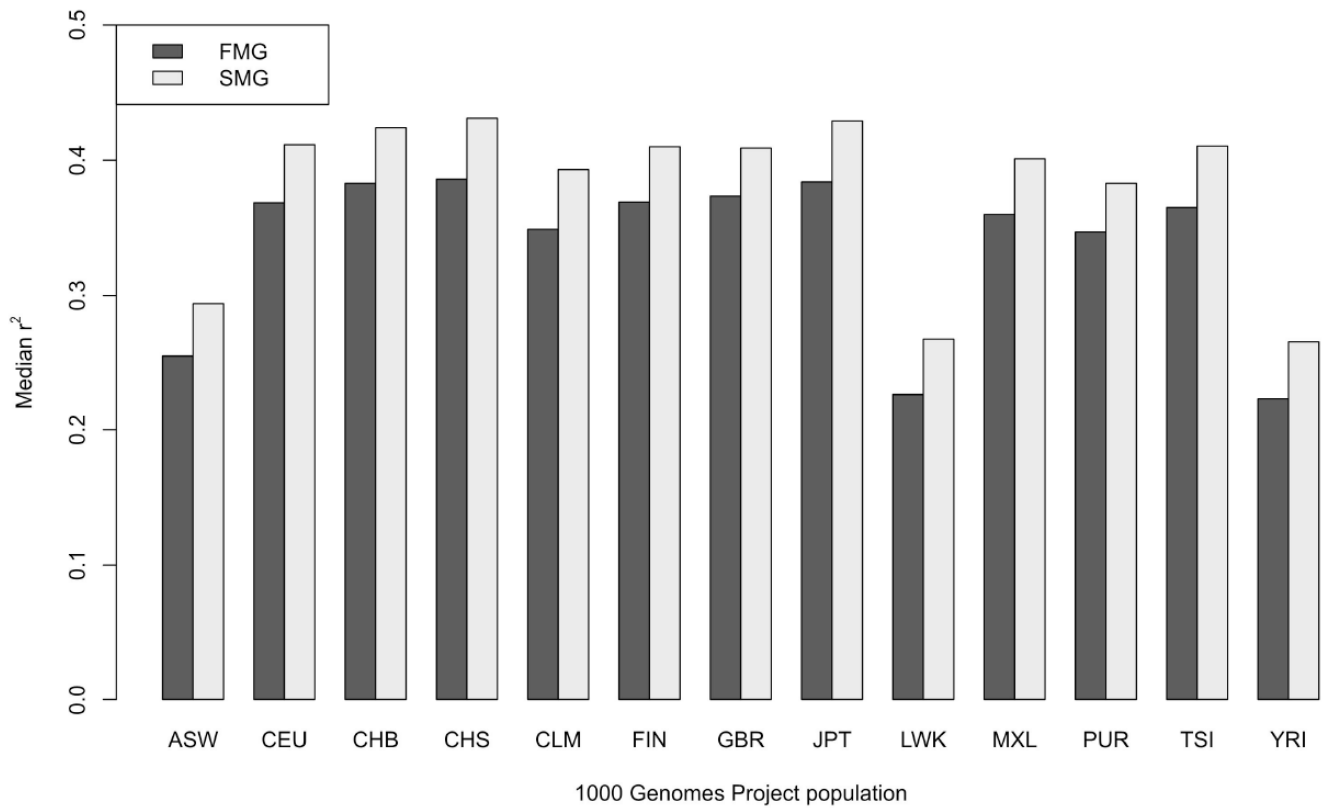

Supplementary Figure S4-9: The bar plots of the SM genes against the FM genes in the LD coefficient  $r^2$  for each of the 13 populations of 1000 Genomes Project.

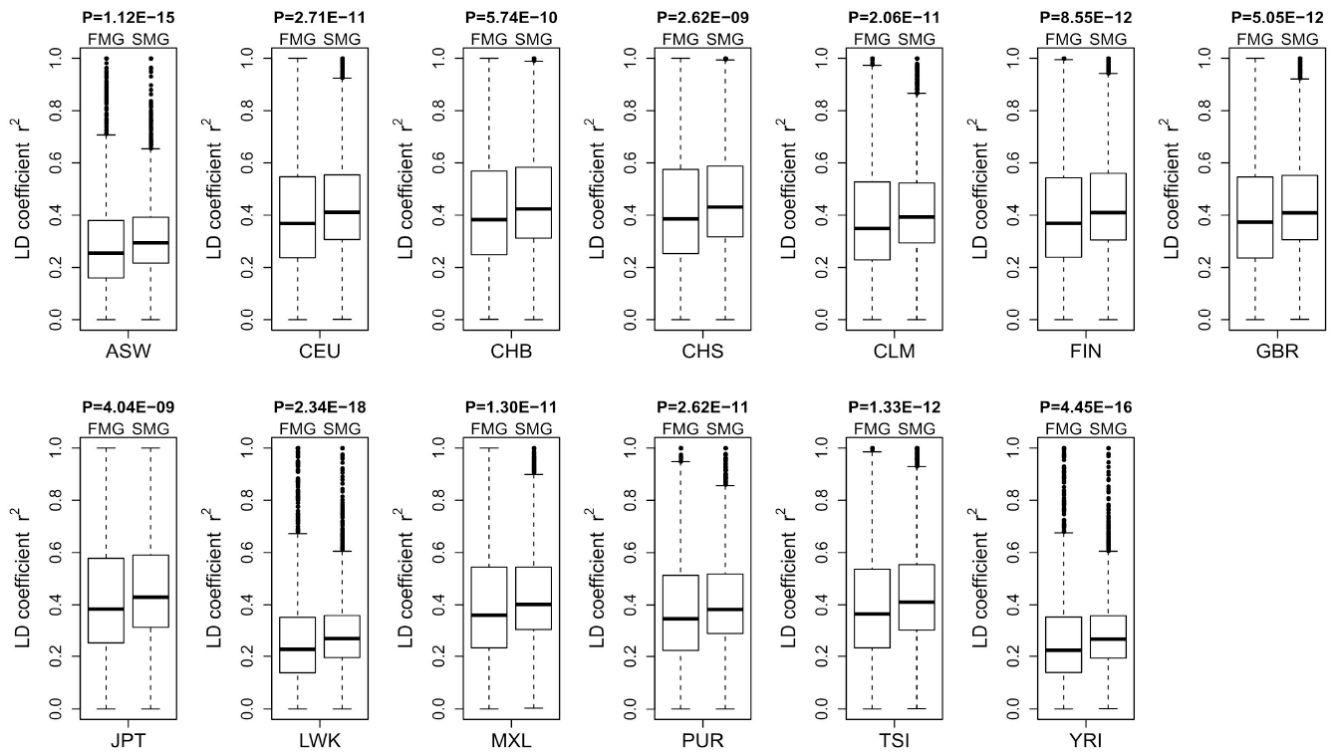

Supplementary Figure S4-10: The box plots of the SM genes against the FM genes in the LD coefficient  $r^2$  for each of the 13 populations of 1000 Genomes Project.

**Supplementary Table S4-1: Summary statistics for the comparisons of dn/ds in 21 species**

**Supplementary Table S4-2: Summary statistics for the comparisons of sequence identity in 21 species**

**Supplementary Table S4-3: Summary statistics for the comparisons of  $r^2$  in HapMap population.**

**Supplementary Table S4-4: Summary statistics for the comparisons of  $r^2$  in 1000 genomes populations**

**SECTION 5: COMPARISON OF EVOLUTIONARY CONSERVATION BETWEEN SM (TOP 25%) AND FM GENES (BOTTOM 25%)**

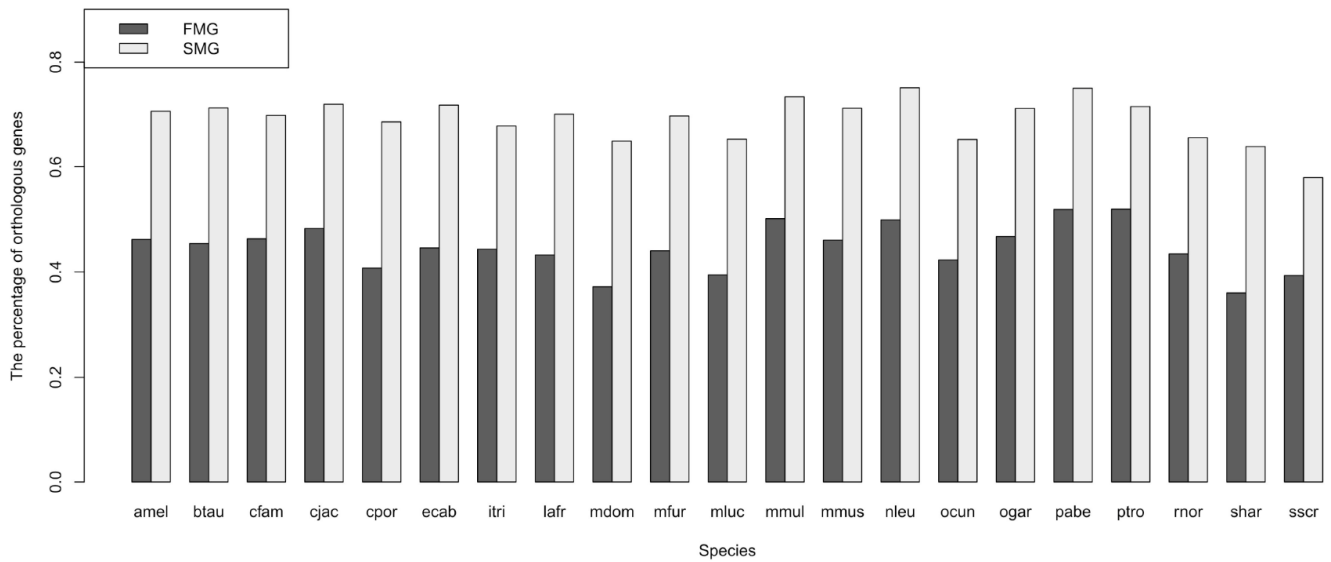

**Supplementary Figure S5-1: The bar plots of the SM genes against the FM genes in the percentage of orthologous genes for each of the 21 species.**

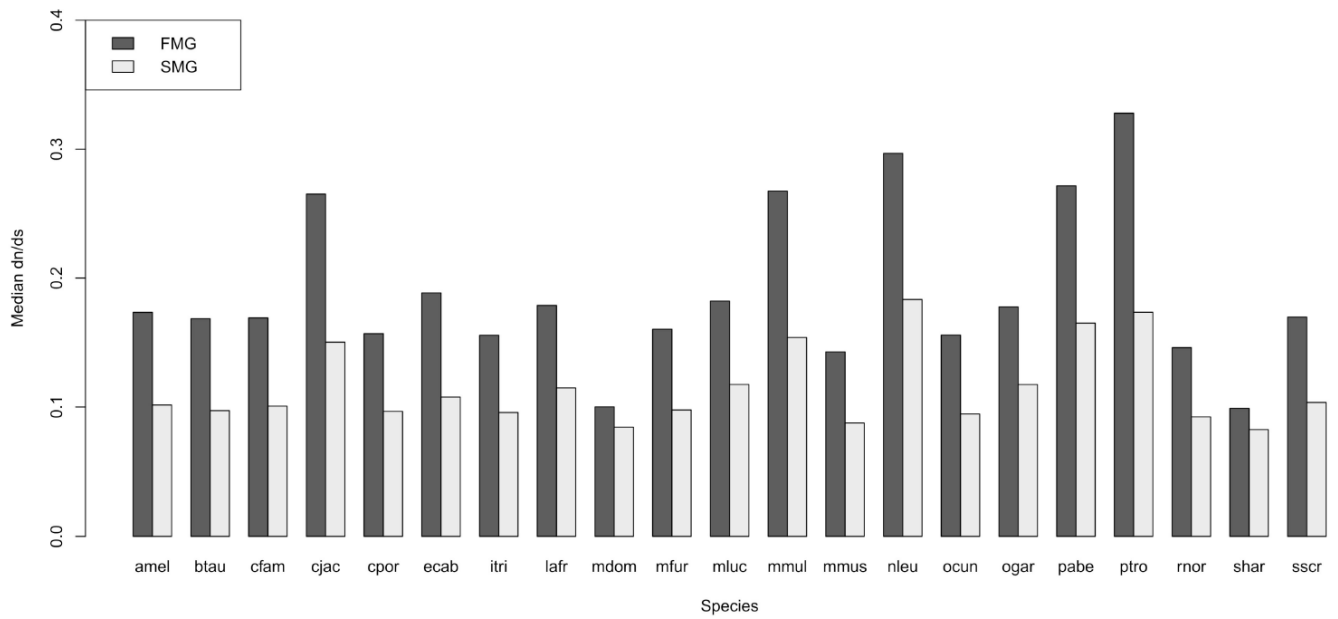

**Supplementary Figure S5-2: The bar plots of the SM genes against the FM genes in the evolutionary rate for each of the 21 species.**



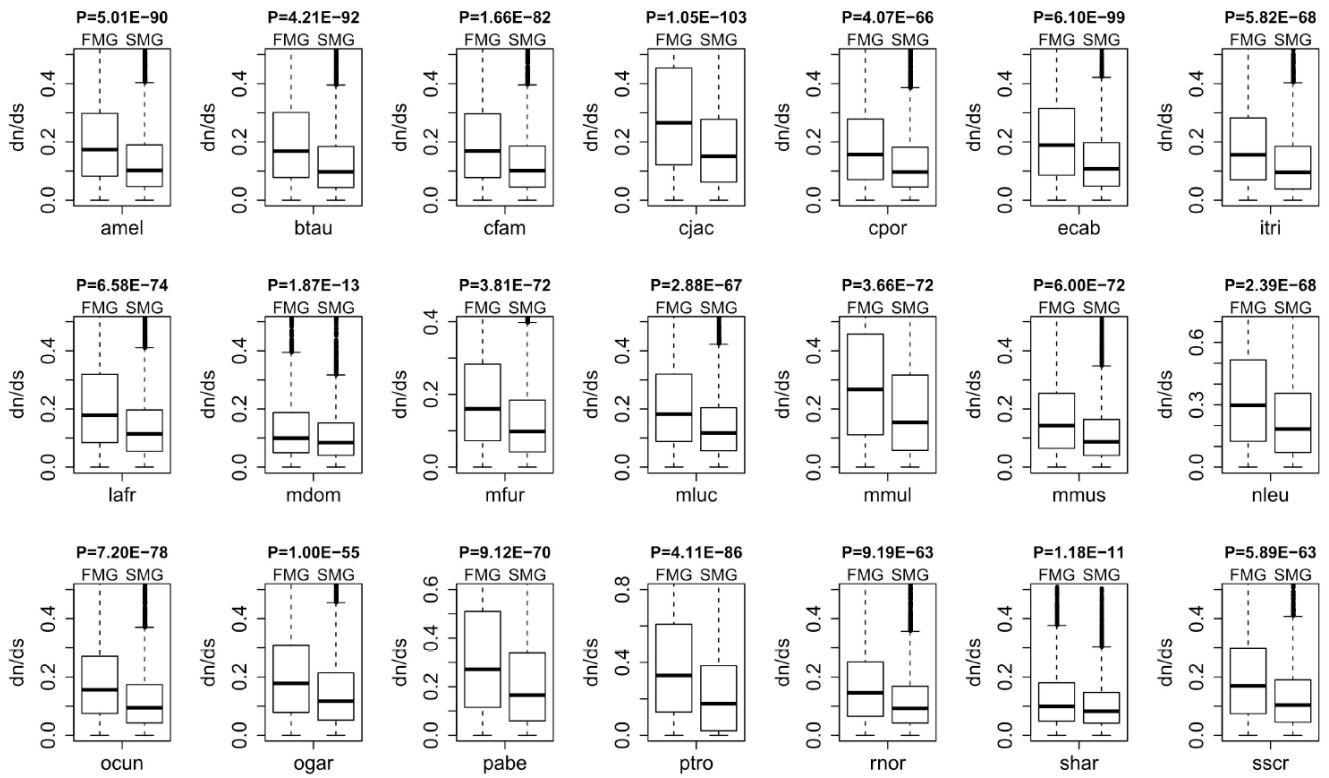

Supplementary Figure S5-3: The box plots of the SM genes against the FM genes in the evolutionary rate for each of the 21 species.

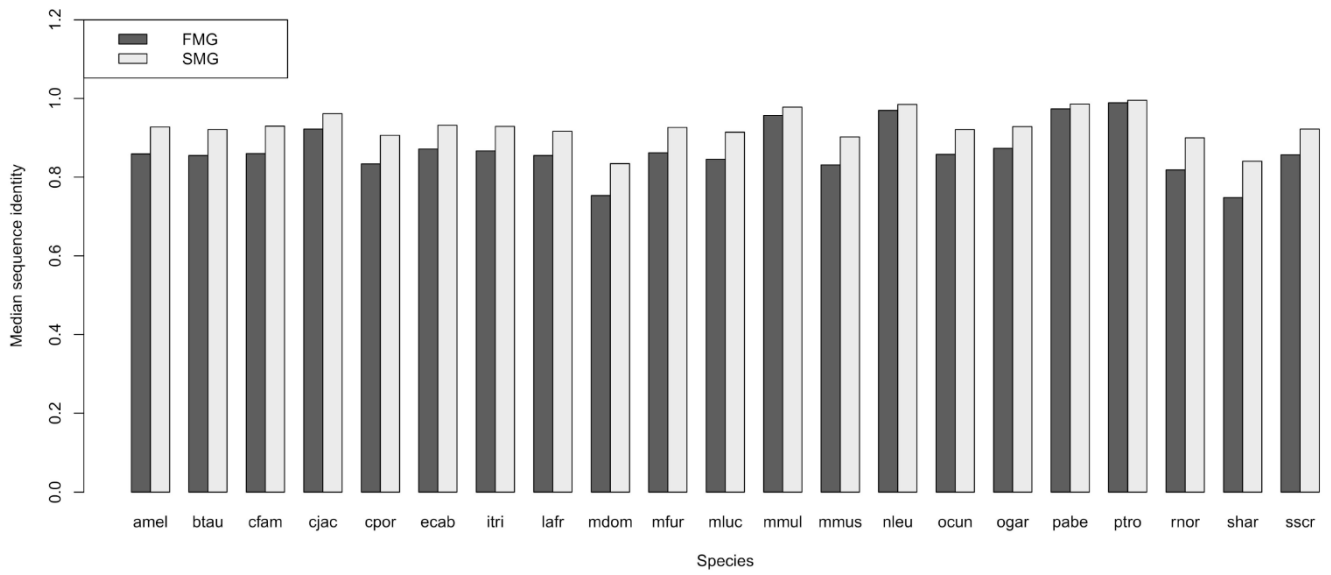

**Supplementary Figure S5-4: The bar plots of the SM genes against the FM genes in the sequence identity for each of the 21 species.**

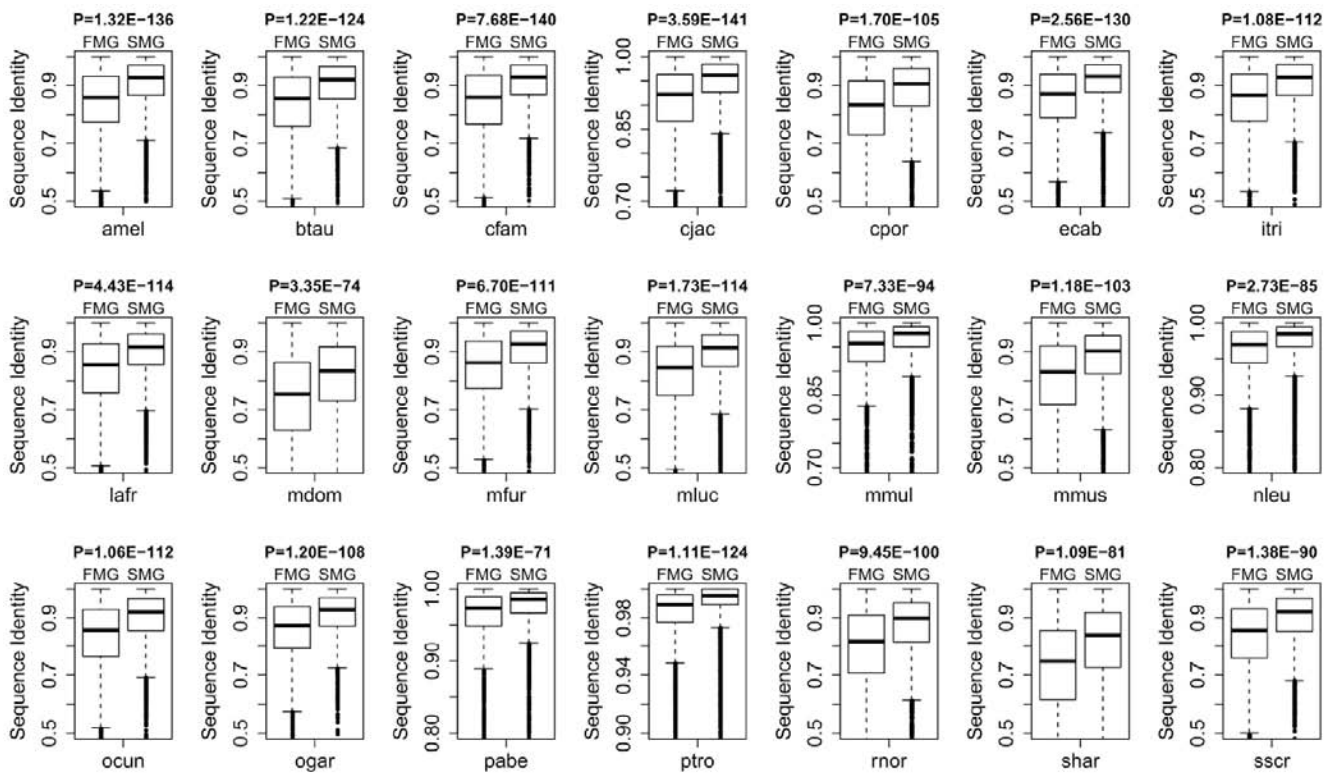

Supplementary Figure S5-5: The box plots of the SM genes against the FM genes in the sequence identity for each of the 21 species.

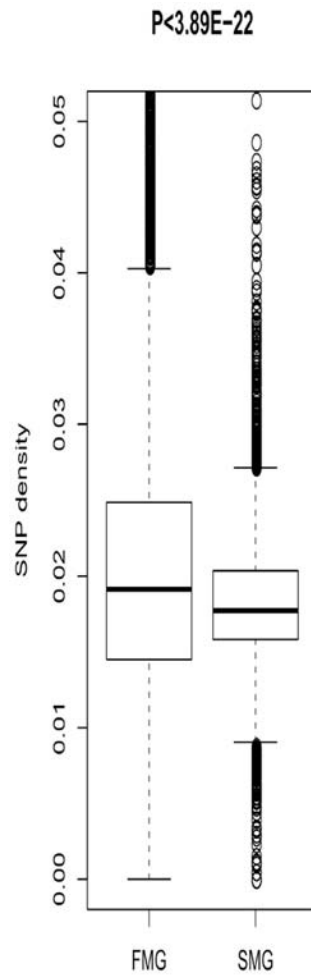

Supplementary Figure S5-6: The box plot of the SM genes against the FM genes in the SNP density.

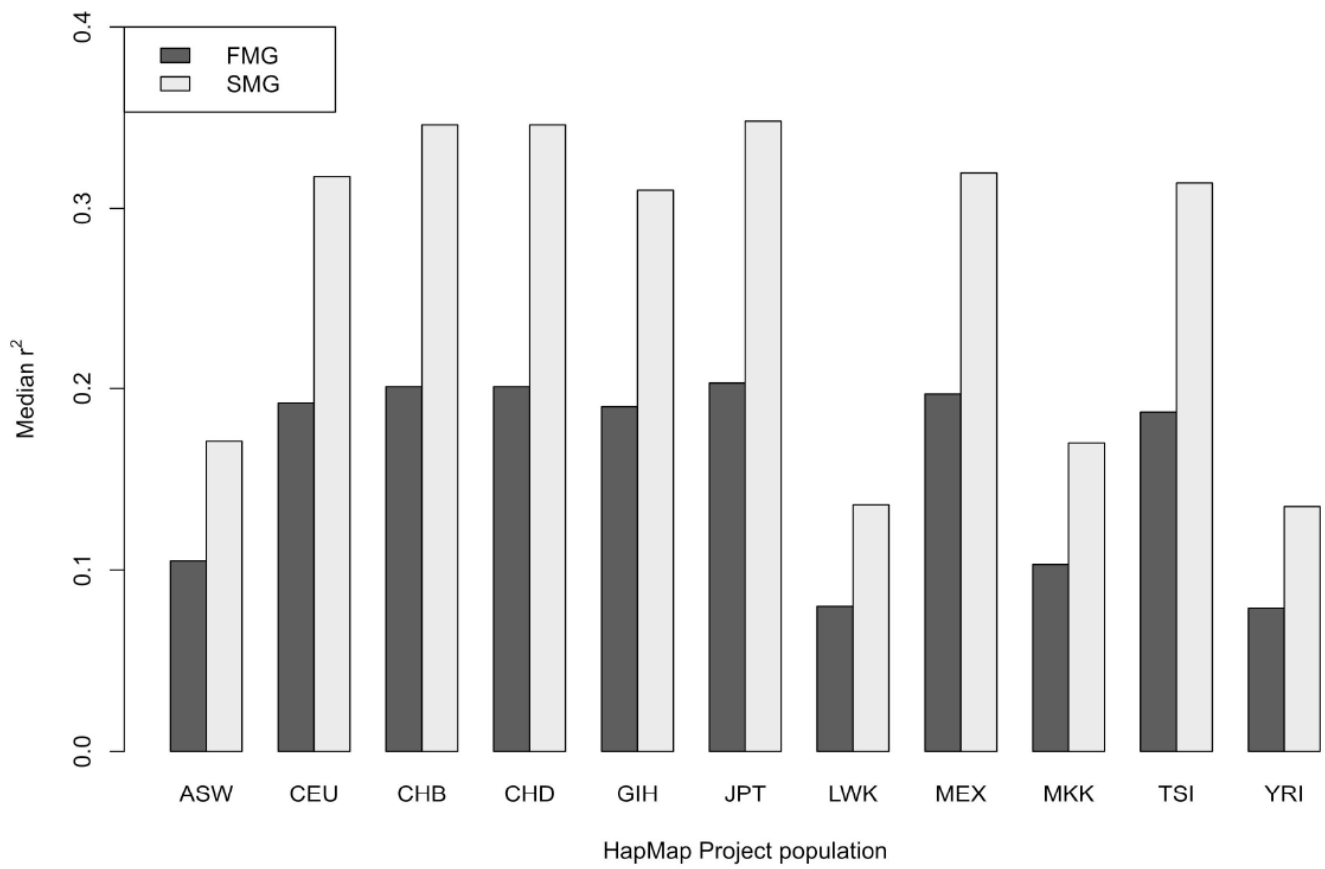

**Supplementary Figure S5-7: The bar plots of the SM genes against the FM genes in the LD coefficient  $r^2$  for each of the 11 populations of HapMap Project.**

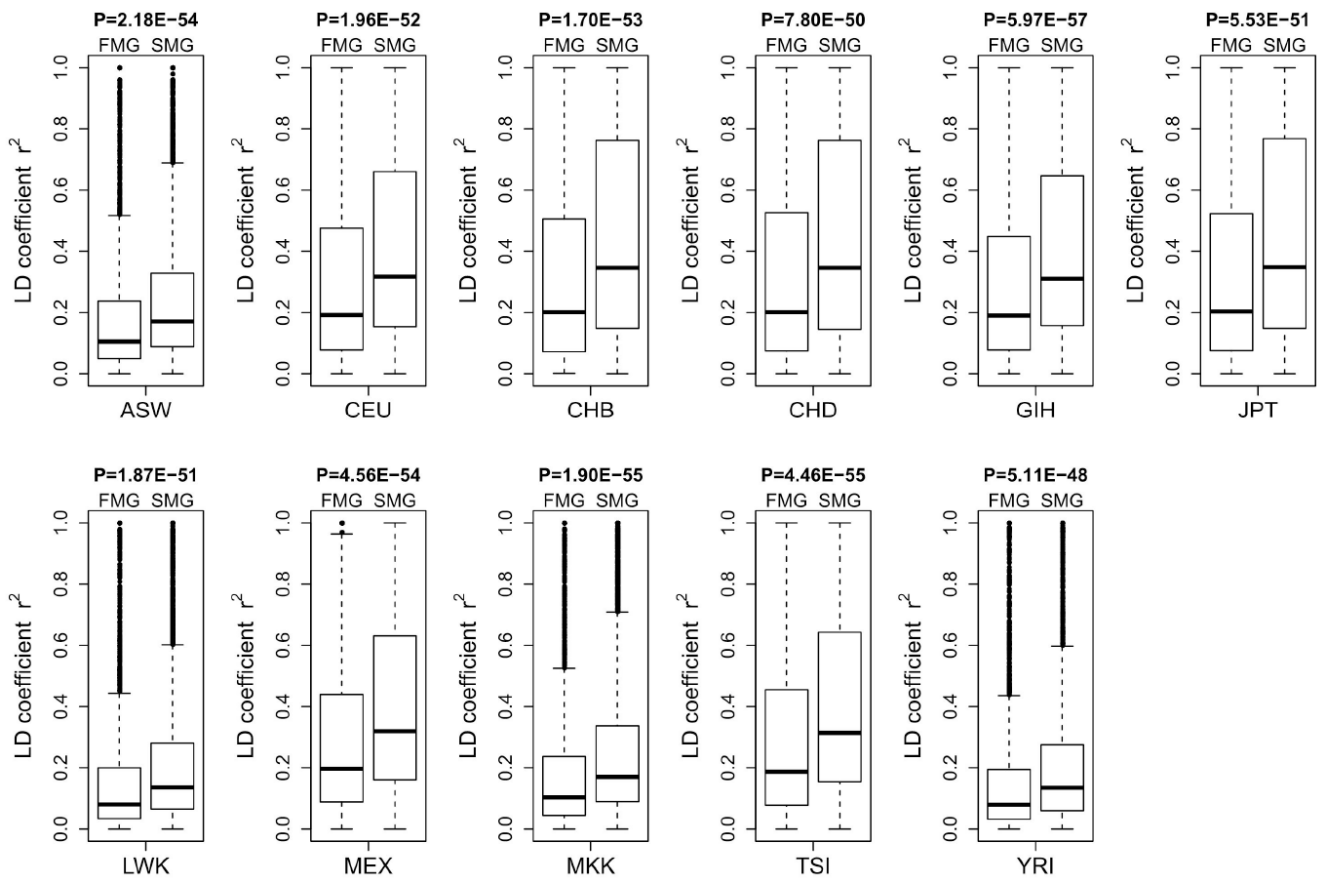

**Supplementary Figure S5-8: The box plots of the SM genes against the FM genes in the LD coefficient  $r^2$  for each of the 11 populations of HapMap Project.**

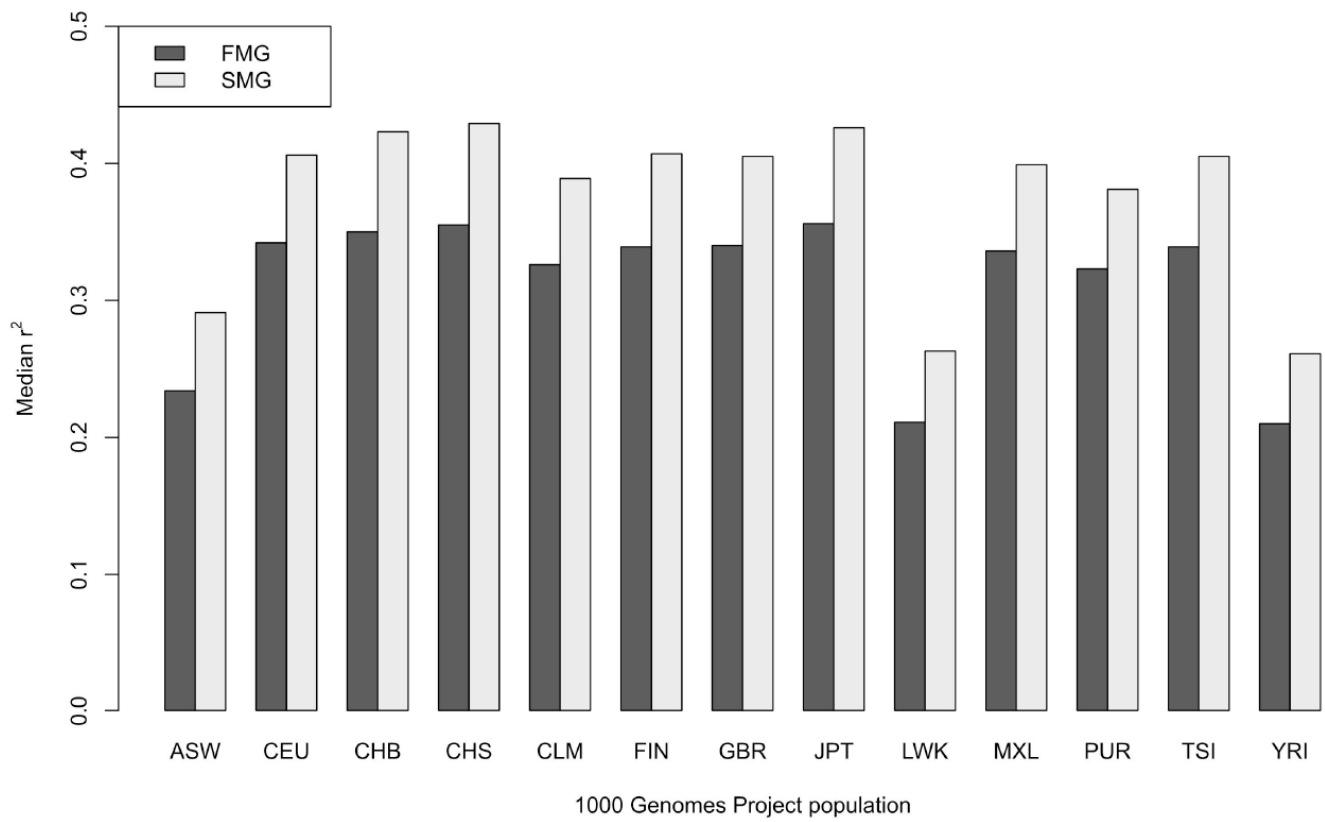

**Supplementary Figure S5-9: The bar plots of the SM genes against the FM genes in the LD coefficient  $r^2$  for each of the 13 populations of 1000 Genomes Project.**

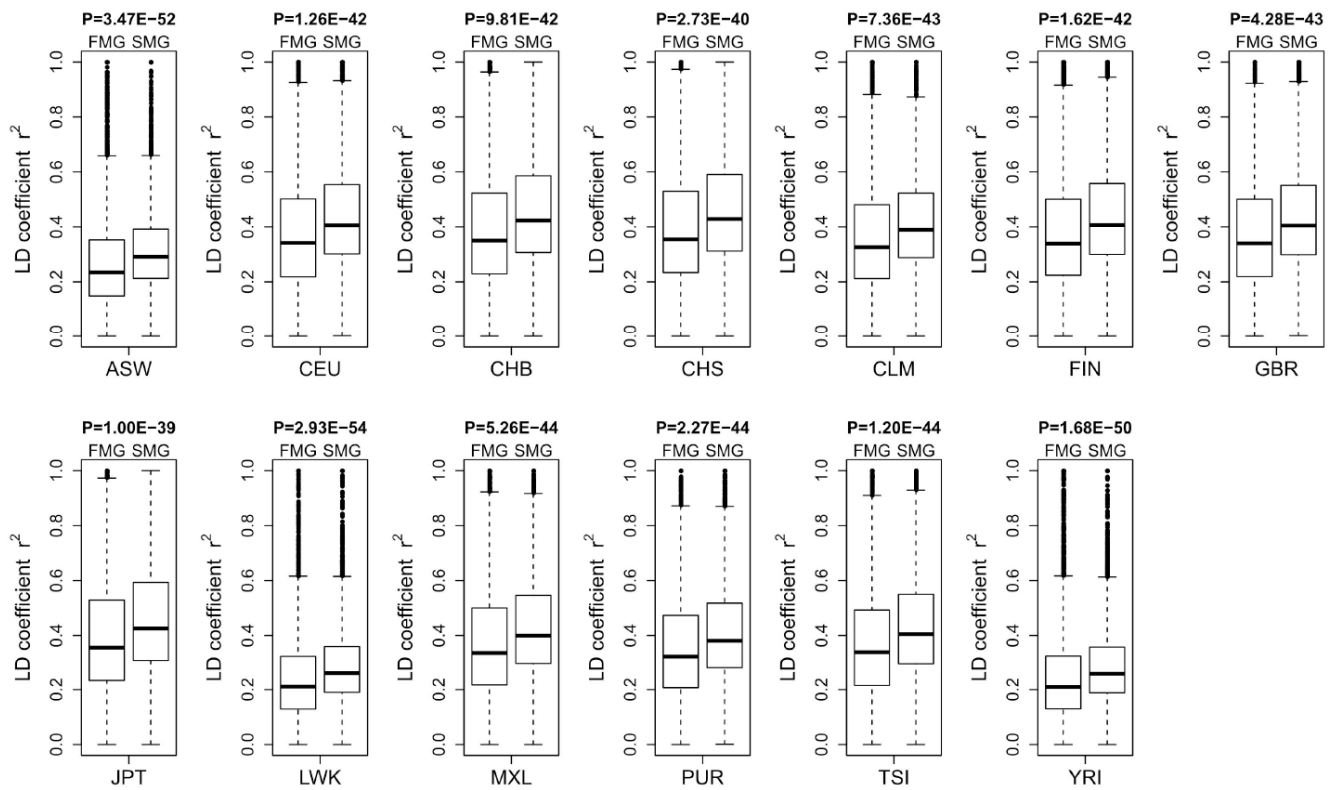

**Supplementary Figure S5-10: The box plots of the SM genes against the FM genes in the LD coefficient  $r^2$  for each of the 13 populations of 1000 Genomes Project.**



**Supplementary Table S5-1: Summary statistics for the comparisons of dn/ds in 21 species**

**Supplementary Table S5-2: Summary statistics for the comparisons of sequence identity in 21 species**

**Supplementary Table S5-3: Summary statistics for the comparisons of  $r^2$  in HapMap population**

**Supplementary Table S5-4: Summary statistics for the comparisons of  $r^2$  in 1000 genomes populations**

**SECTION 6: COMPARISON OF EVOLUTIONARY CONSERVATION BETWEEN SM (TOP 20%) AND FM GENES (BOTTOM 20%) USING EXON DATA**

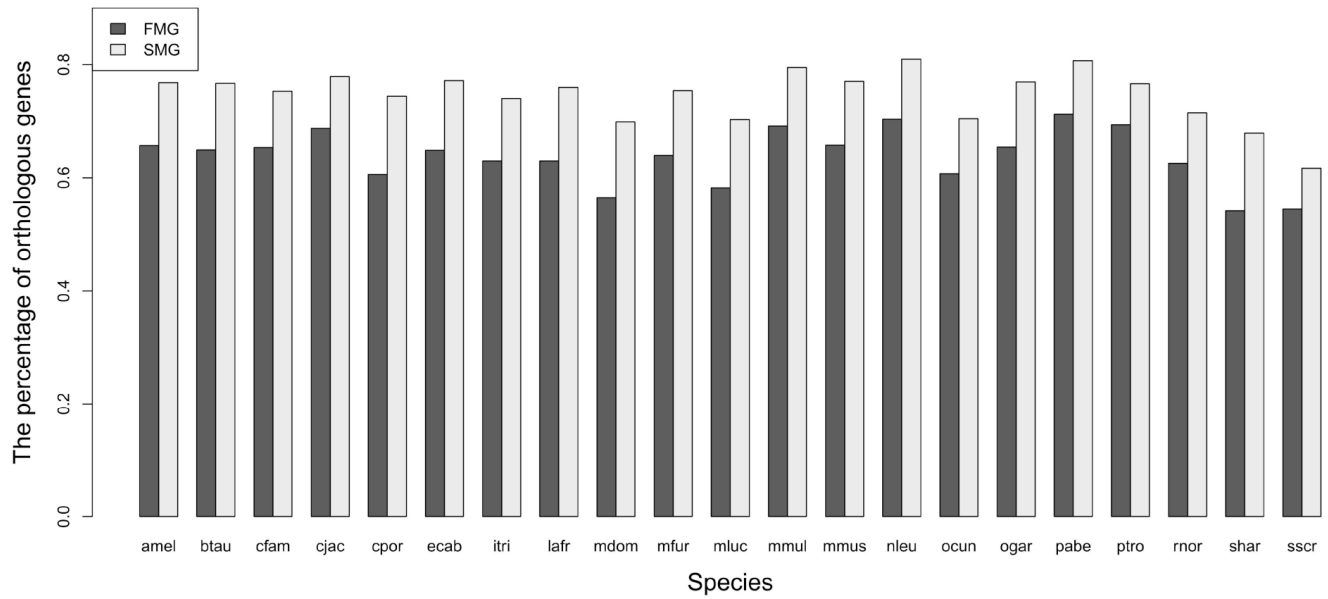

**Supplementary Figure S6-1: The bar plots of the SM genes against the FM genes in the percentage of orthologous genes for each of the 21 species.**

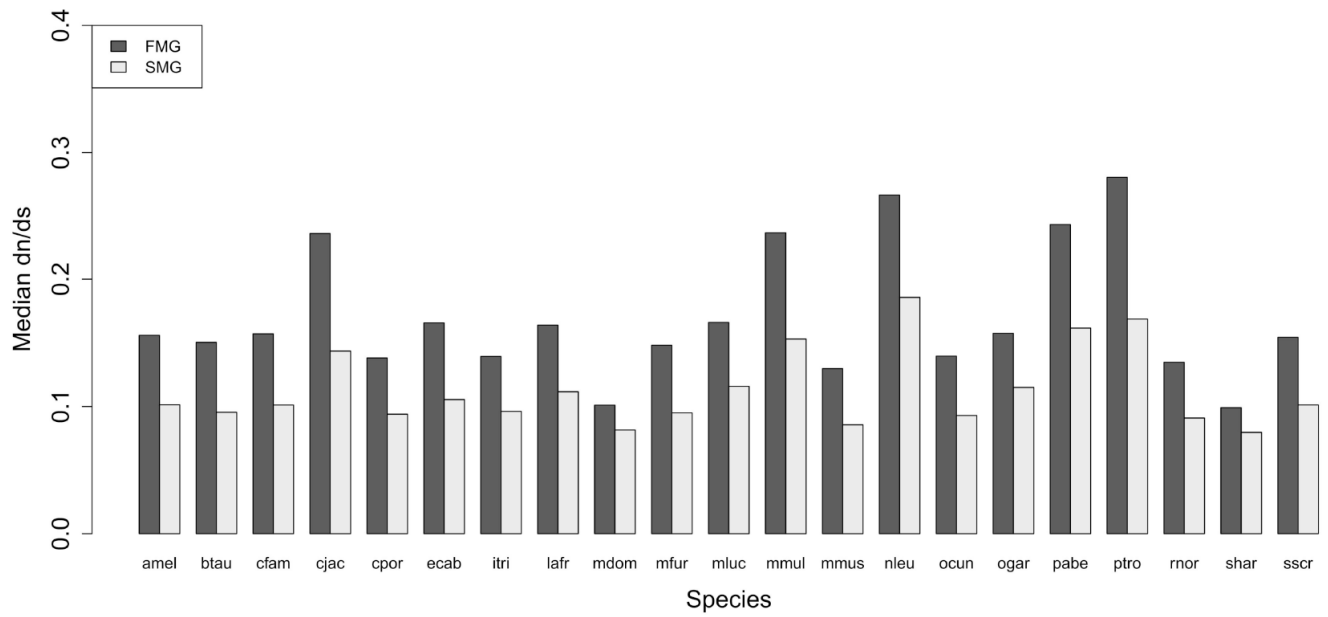

Supplementary Figure S6-2: The bar plots of the SM genes against the FM genes in the evolutionary rate for each of the 21 species.

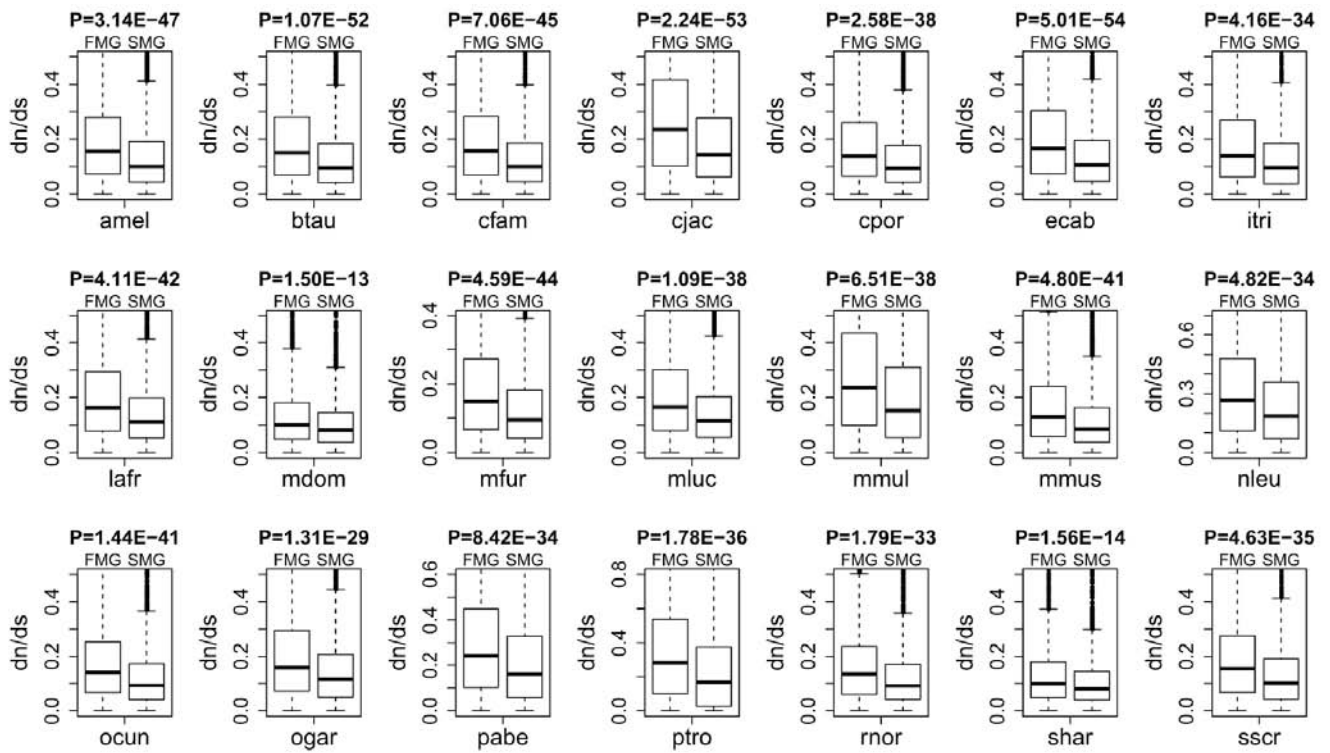

Supplementary Figure S6-3: The box plots of the SM genes against the FM genes in the evolutionary rate for each of the 21 species.

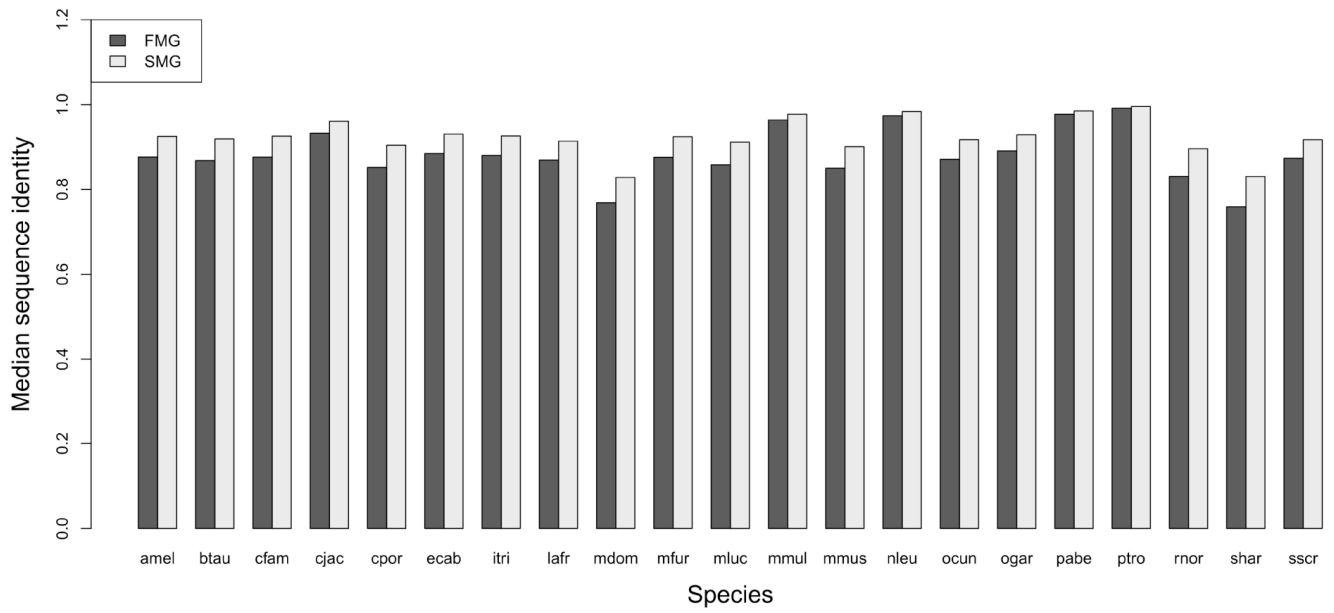

**Supplementary Figure S6-4: The bar plots of the SM genes against the FM genes in the sequence identity for each of the 21 species.**

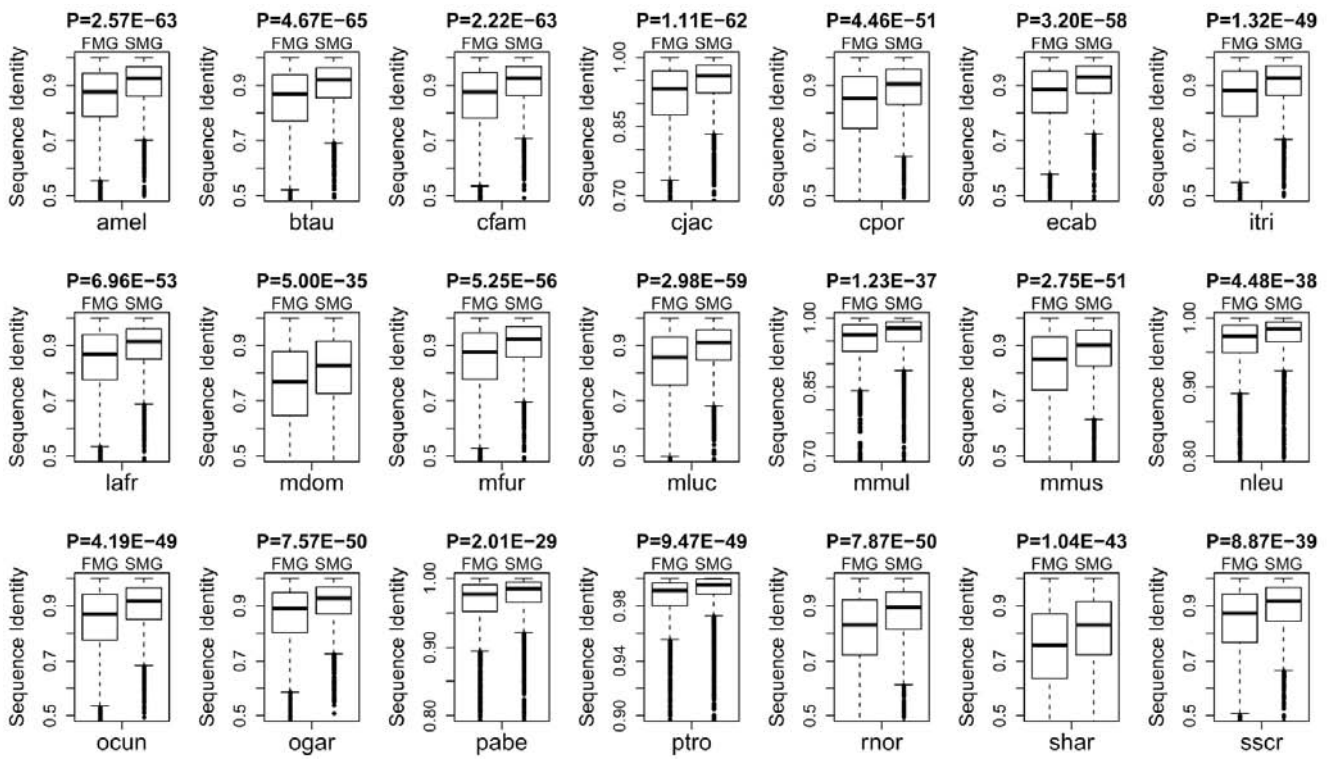

Supplementary Figure S6-5: The box plots of the SM genes against the FM genes in the sequence identity for each of the 21 species.

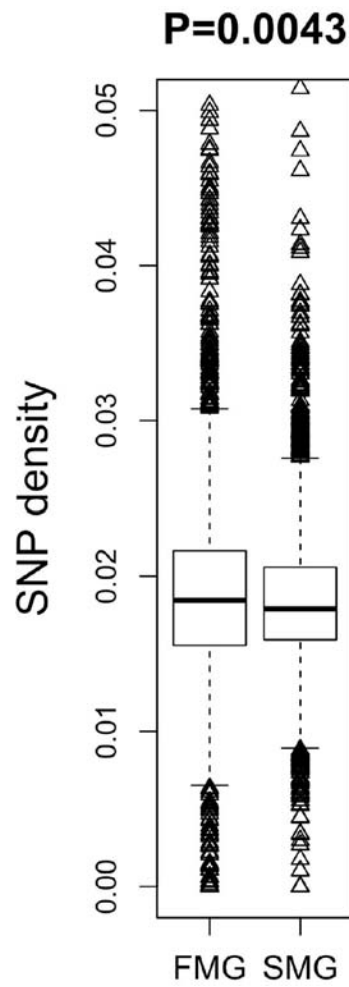

Supplementary Figure S6-6: The box plot of the SM genes against the FM genes in the SNP density.

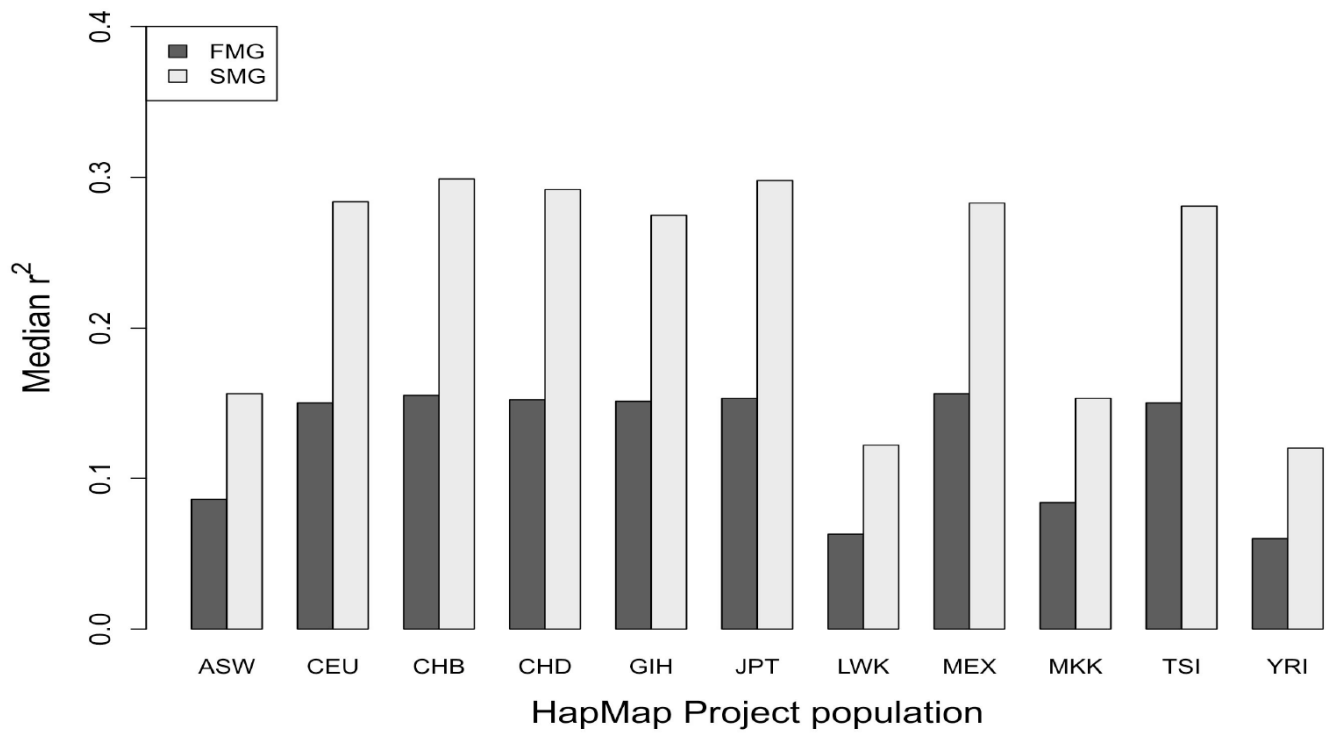

Supplementary Figure S6-7: The bar plots of the SM genes against the FM genes in the LD coefficient  $r^2$  for each of the 11 populations of HapMap Project.



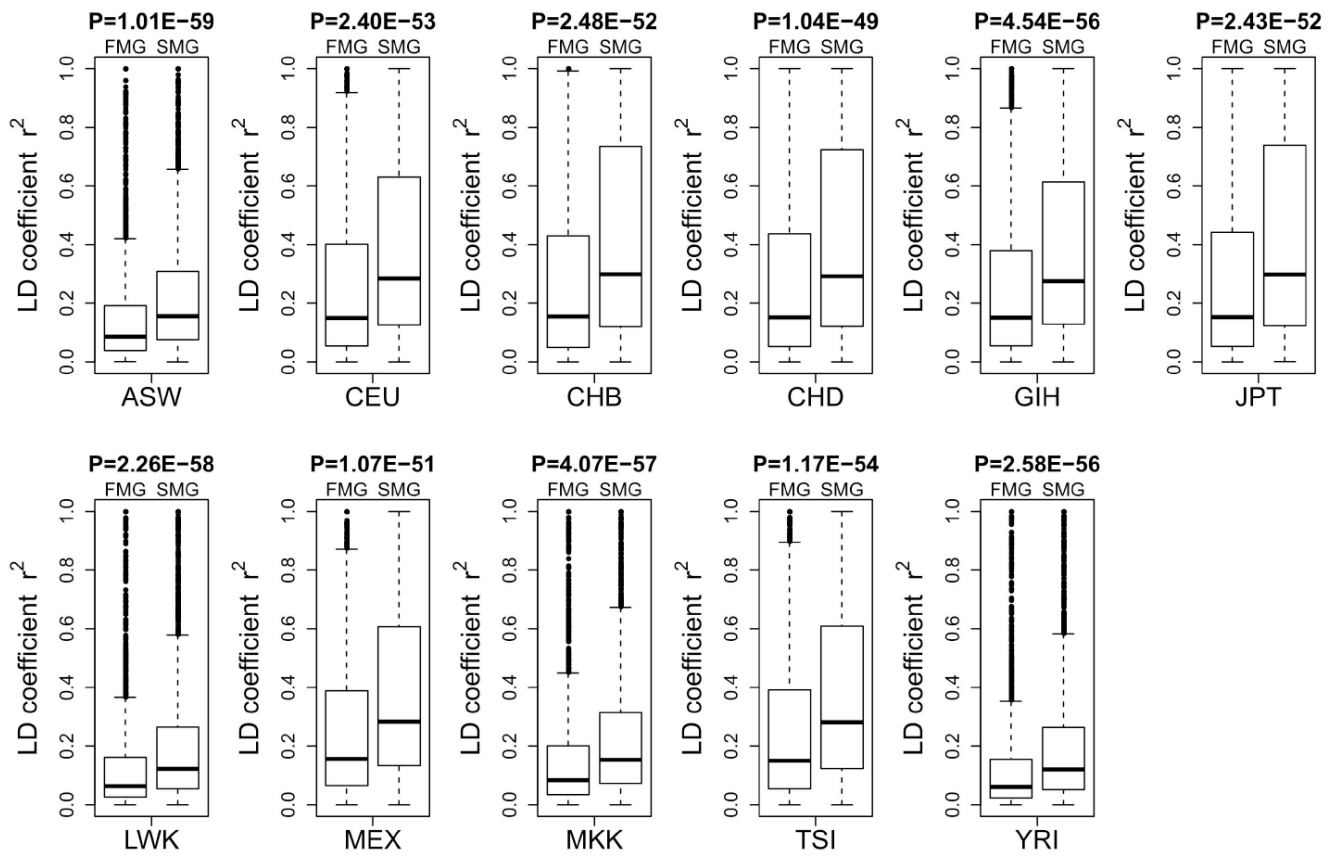

Supplementary Figure S6-8: The box plots of the SM genes against the FM genes in the LD coefficient  $r^2$  for each of the 11 populations of HapMap Project.

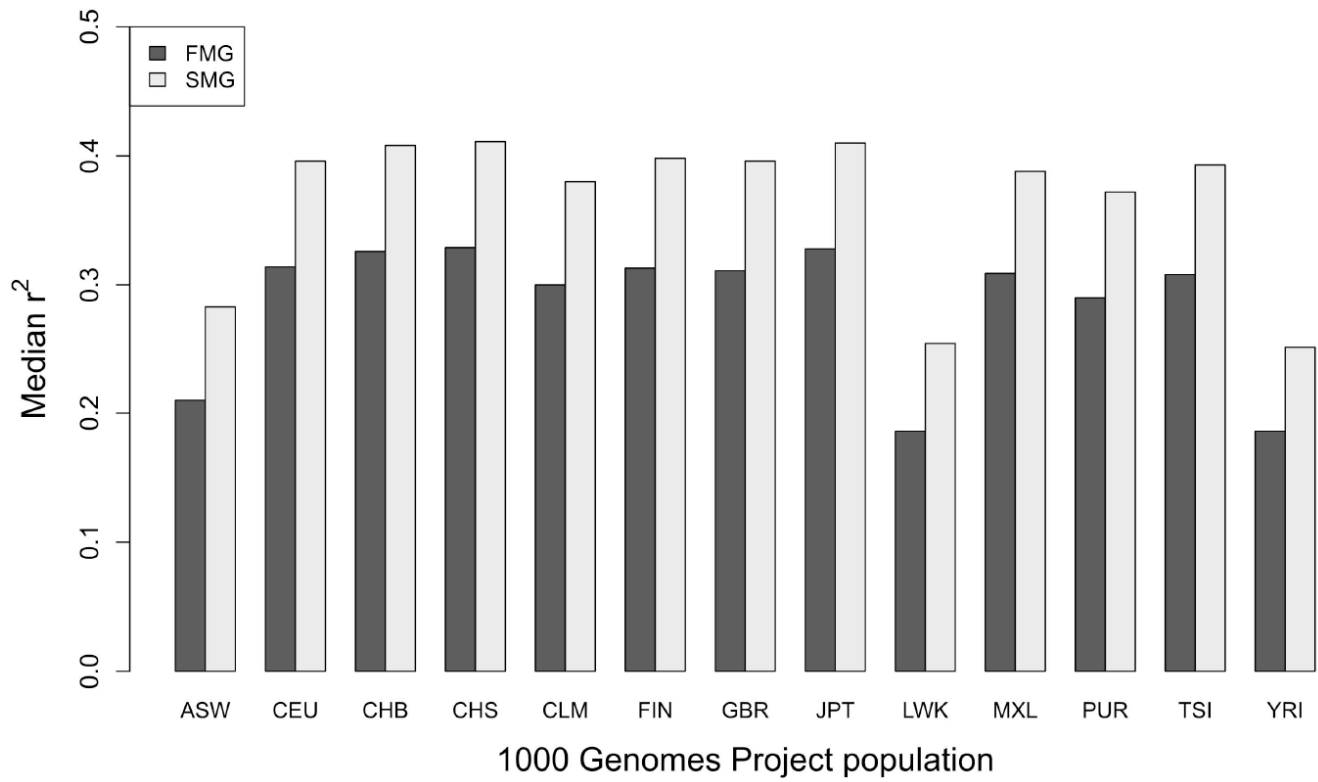

Supplementary Figure S6-9: The bar plots of the SM genes against the FM genes in the LD coefficient  $r^2$  for each of the 13 populations of 1000 Genomes Project.

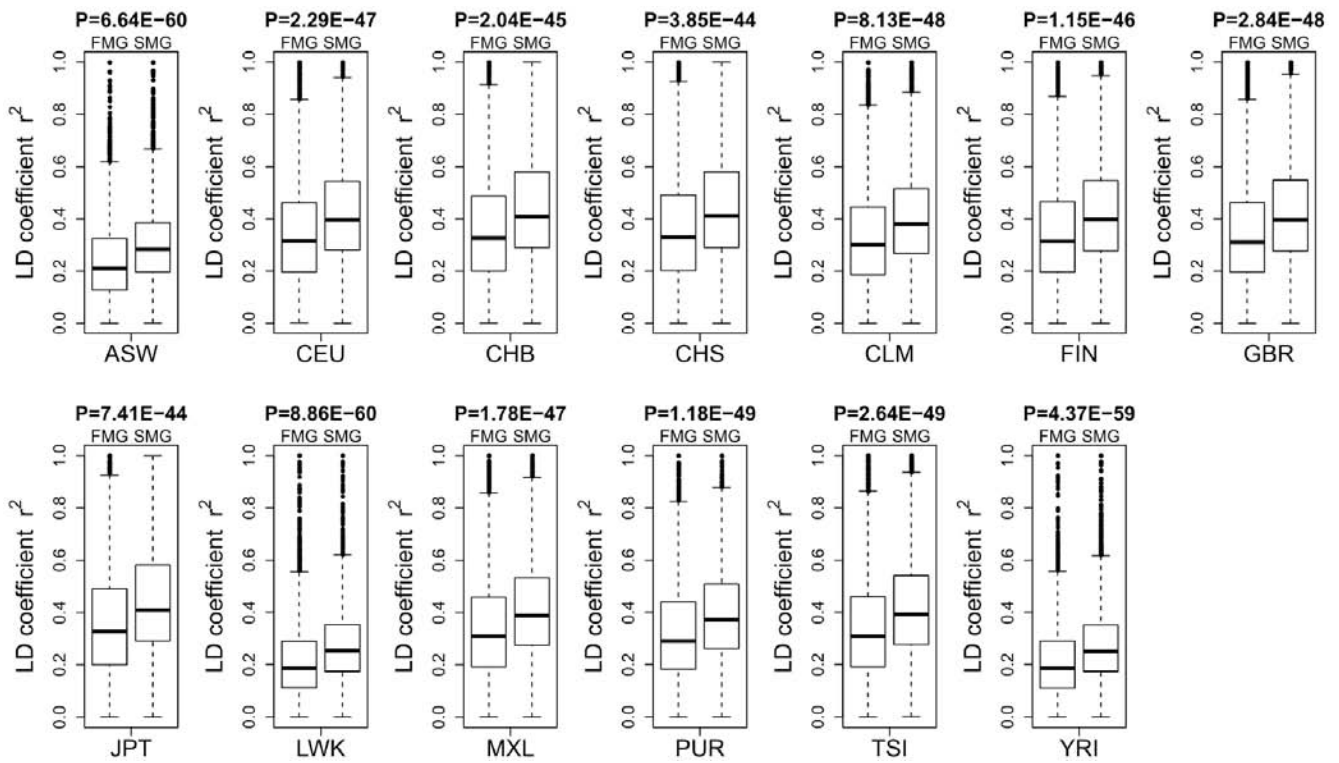

Supplementary Figure S6-10: The box plots of the SM genes against the FM genes in the LD coefficient  $r^2$  for each of the 13 populations of 1000 Genomes Project.

**Supplementary Table S6-1: Summary statistics for the comparisons of dn/ds in 21 species**

**Supplementary Table S6-2: Summary statistics for the comparisons of sequence identity in 21 species**

**Supplementary Table S6-3: Summary statistics for the comparisons of  $r^2$  in HapMap population**

**Supplementary Table S6-4: Summary statistics for the comparisons of  $r^2$  in 1000 genomes populations**

**SECTION 7: COMPARISON OF EVOLUTIONARY CONSERVATION BETWEEN SM (TOP 20%) AND FM GENES (BOTTOM 20%) USING INTRON DATA**

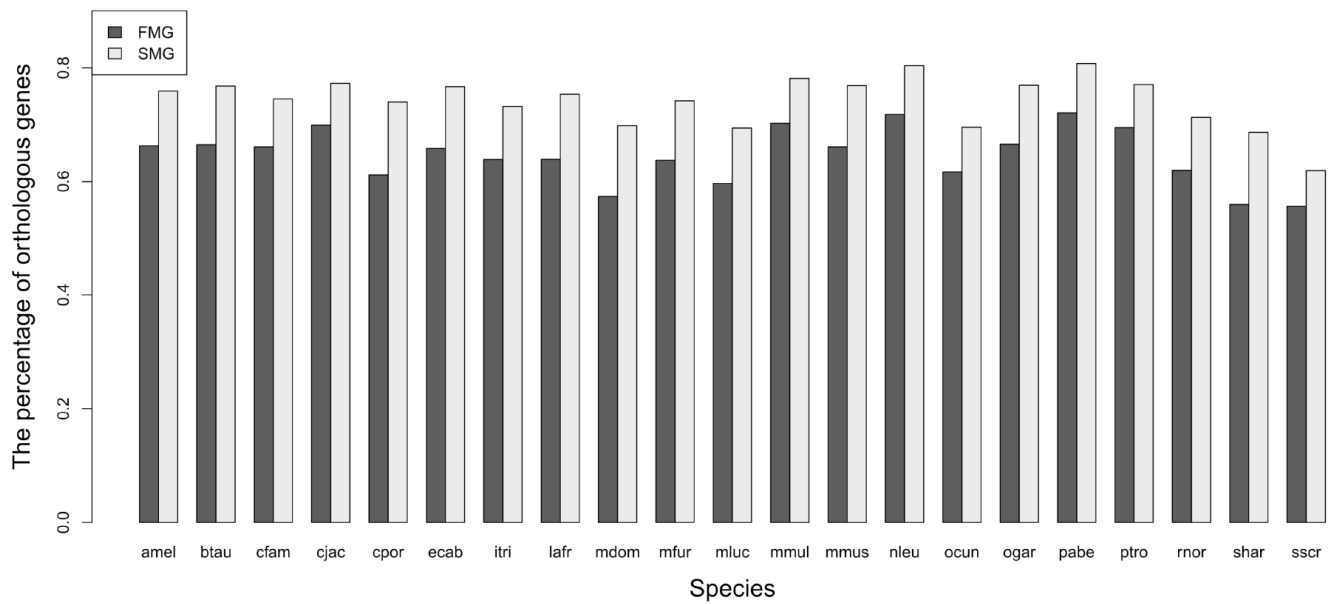

**Supplementary Figure S7-1: The bar plots of the SM genes against the FM genes in the percentage of orthologous genes for each of the 21 species.**

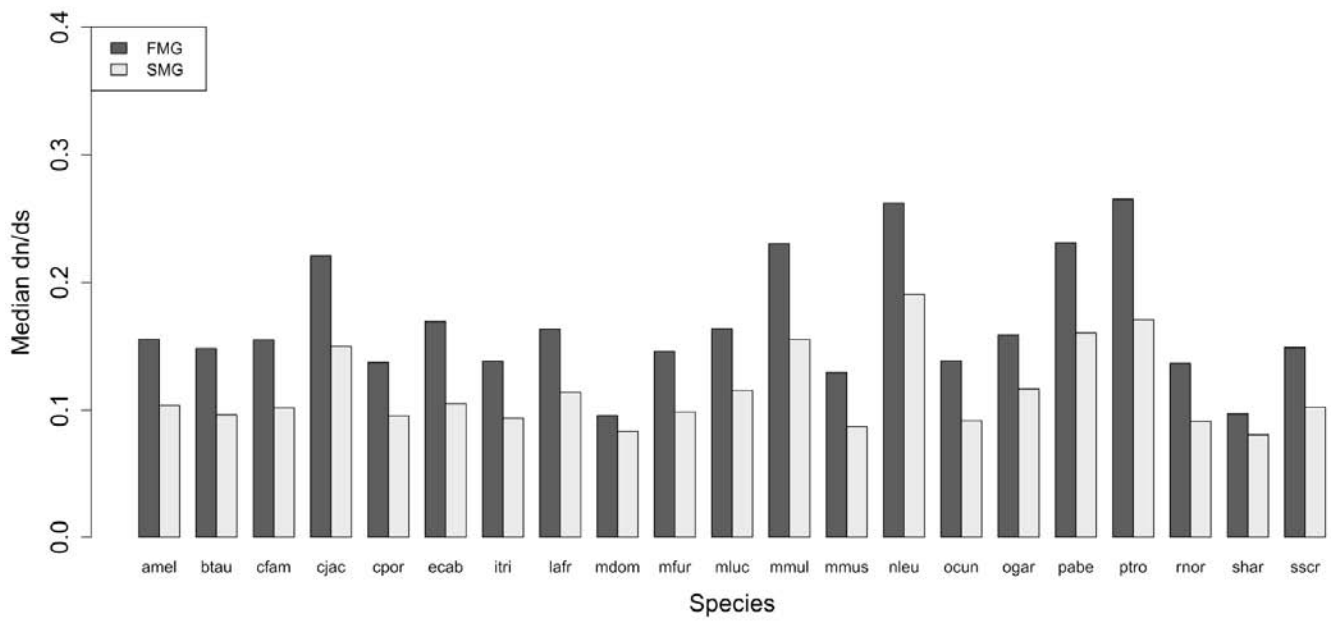

Supplementary Figure S7-2: The bar plots of the SM genes against the FM genes in the evolutionary rate for each of the 21 species.

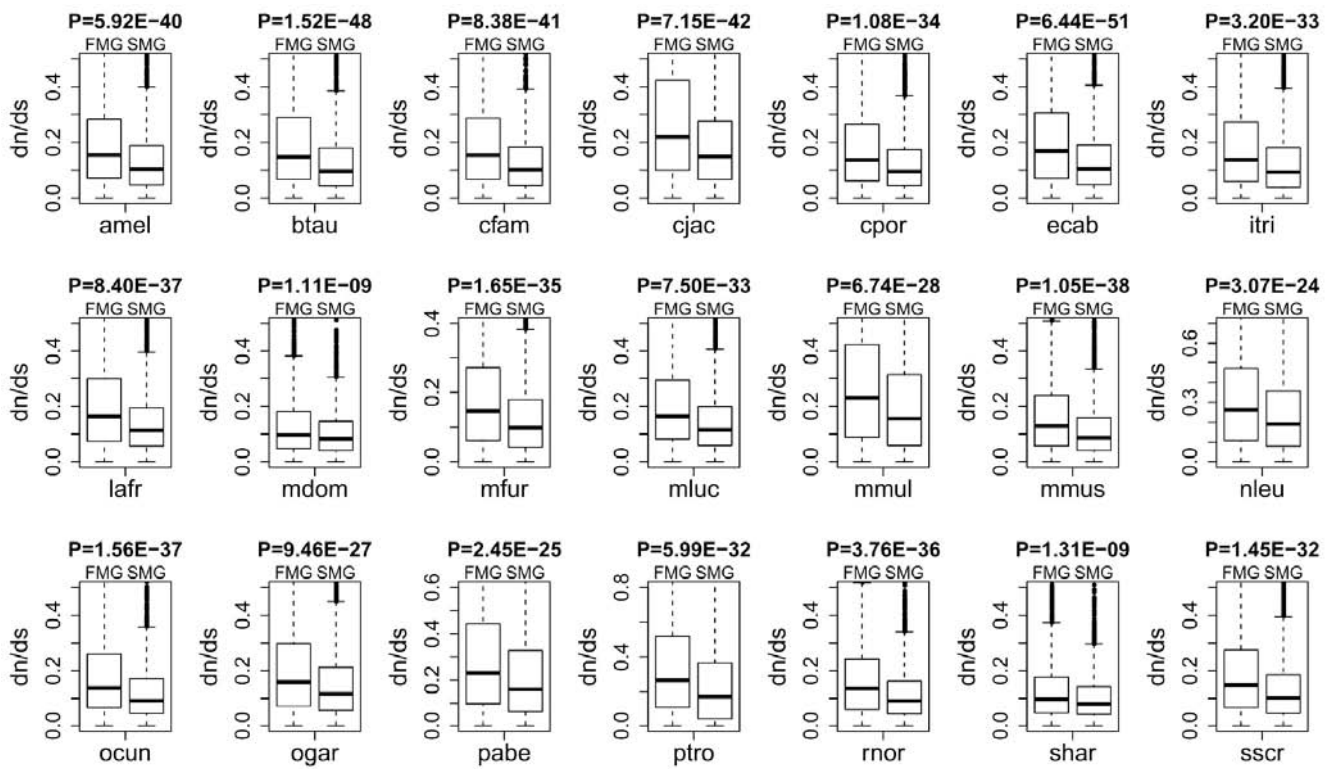

Supplementary Figure S7-3: The box plots of the SM genes against the FM genes in the evolutionary rate for each of the 21 species.

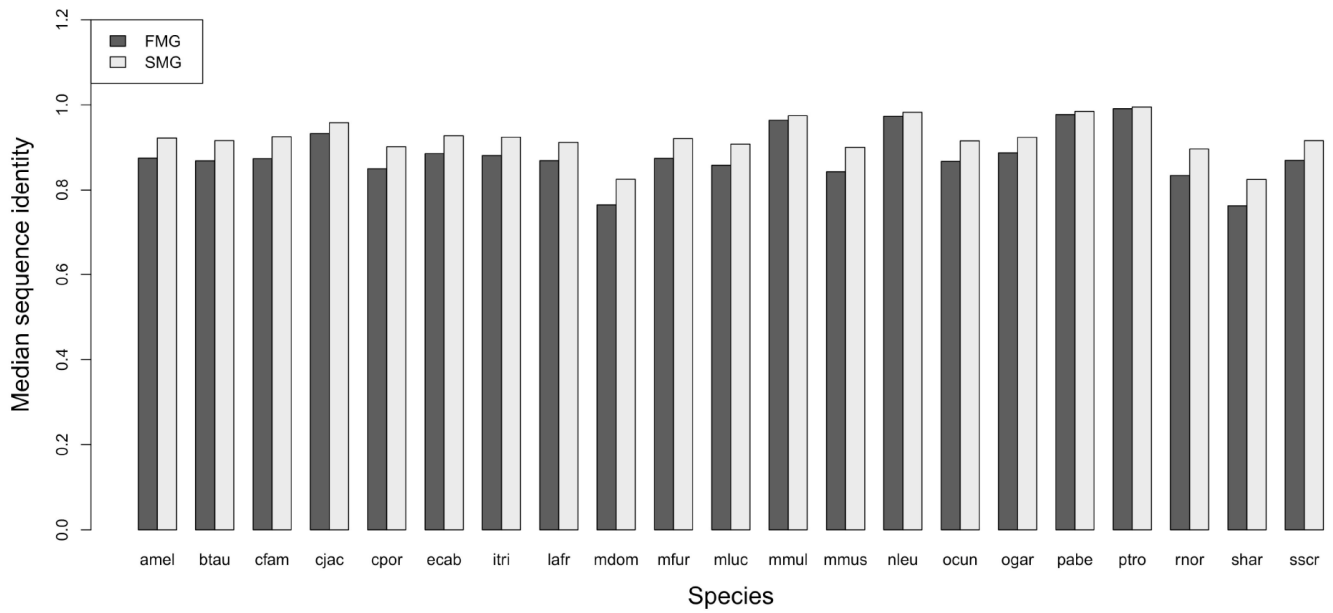

**Supplementary Figure S7-4: The bar plots of the SM genes against the FM genes in the sequence identity for each of the 21 species.**



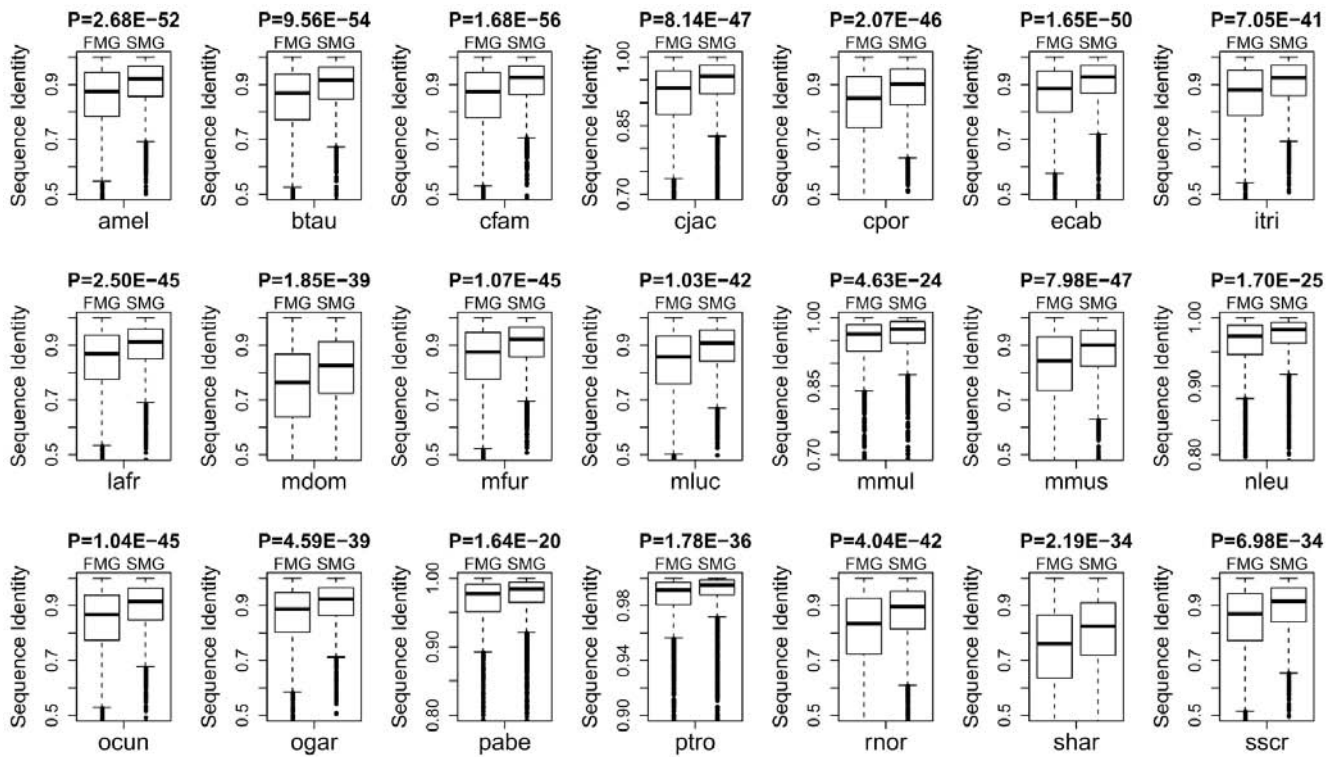

Supplementary Figure S7-5: The box plots of the SM genes against the FM genes in the sequence identity for each of the 21 species.

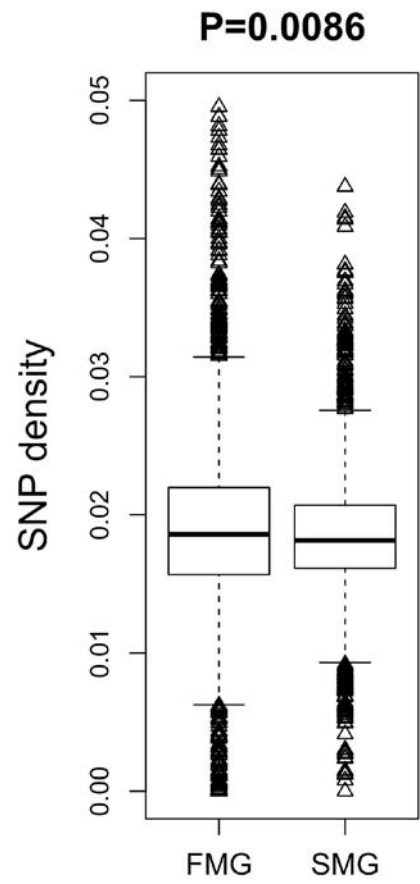

Supplementary Figure S7-6: The box plot of the SM genes against the FM genes in the SNP density.

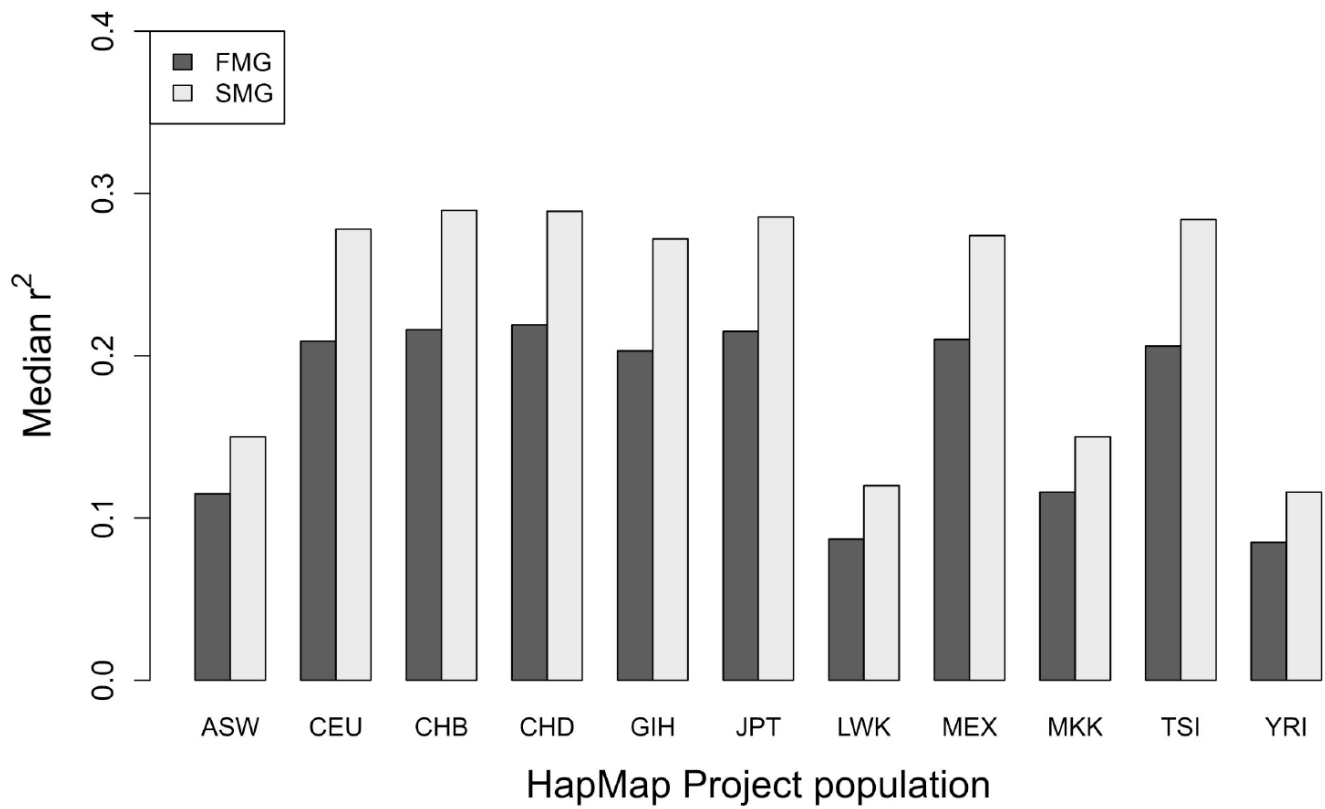

Supplementary Figure S7-7: The bar plots of the SM genes against the FM genes in the LD coefficient  $r^2$  for each of the 11 populations of HapMap Project.

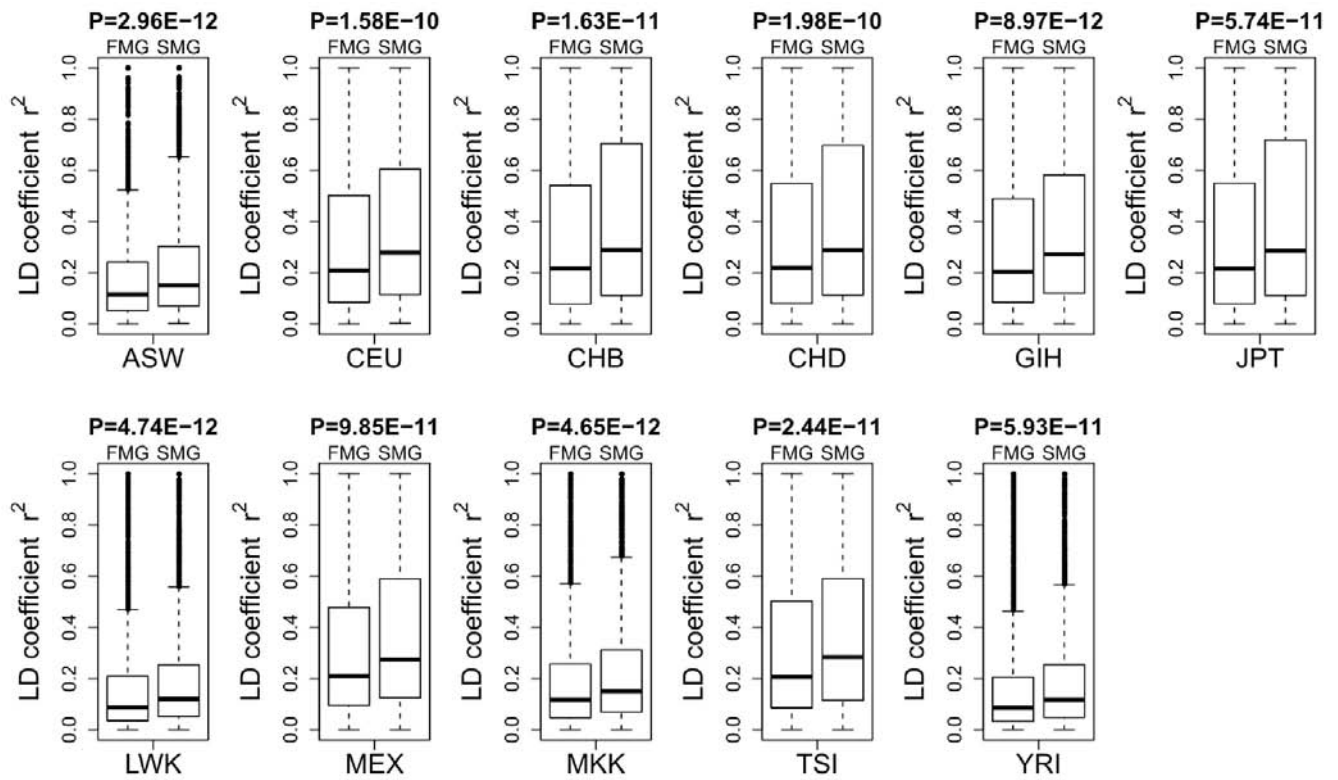

Supplementary Figure S7-8: The box plots of the SM genes against the FM genes in the LD coefficient  $r^2$  for each of the 11 populations of HapMap Project.

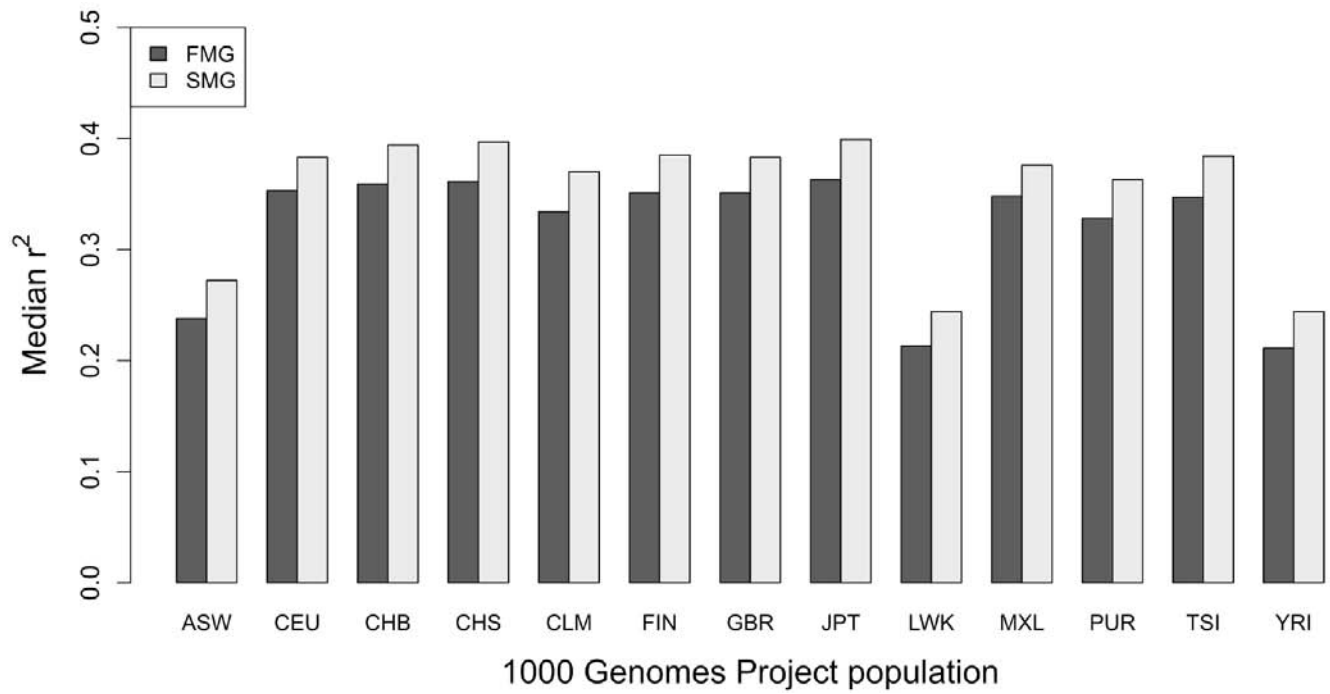

Supplementary Figure S7-9: The bar plots of the SM genes against the FM genes in the LD coefficient  $r^2$  for each of the 13 populations of 1000 Genomes Project.

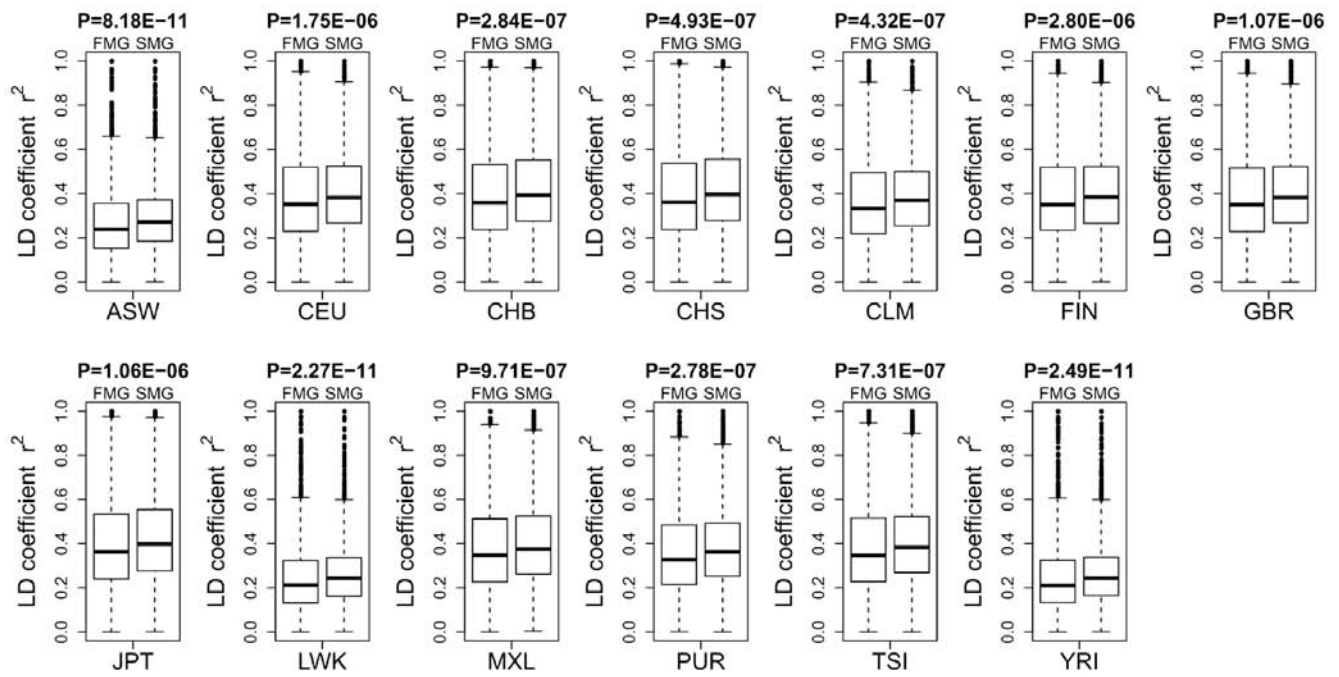

Supplementary Figure S7-10: The box plots of the SM genes against the FM genes in the LD coefficient  $r^2$  for each of the 13 populations of 1000 Genomes Project.

**Supplementary Table S7-1: Summary statistics for the comparisons of dn/ds in 21 species**

**Supplementary Table S7-2: Summary statistics for the comparisons of sequence identity in 21 species**

**Supplementary Table S7-3: Summary statistics for the comparisons of  $r^2$  in HapMap population**

**Supplementary Table S7-4: Summary statistics for the comparisons of  $r^2$  in 1000 genomes populations**

**SECTION 8: COMPARISON OF EVOLUTIONARY CONSERVATION BETWEEN SM (TOP 20%) AND FM GENES (BOTTOM 20%) USING 3'UTR DATA**

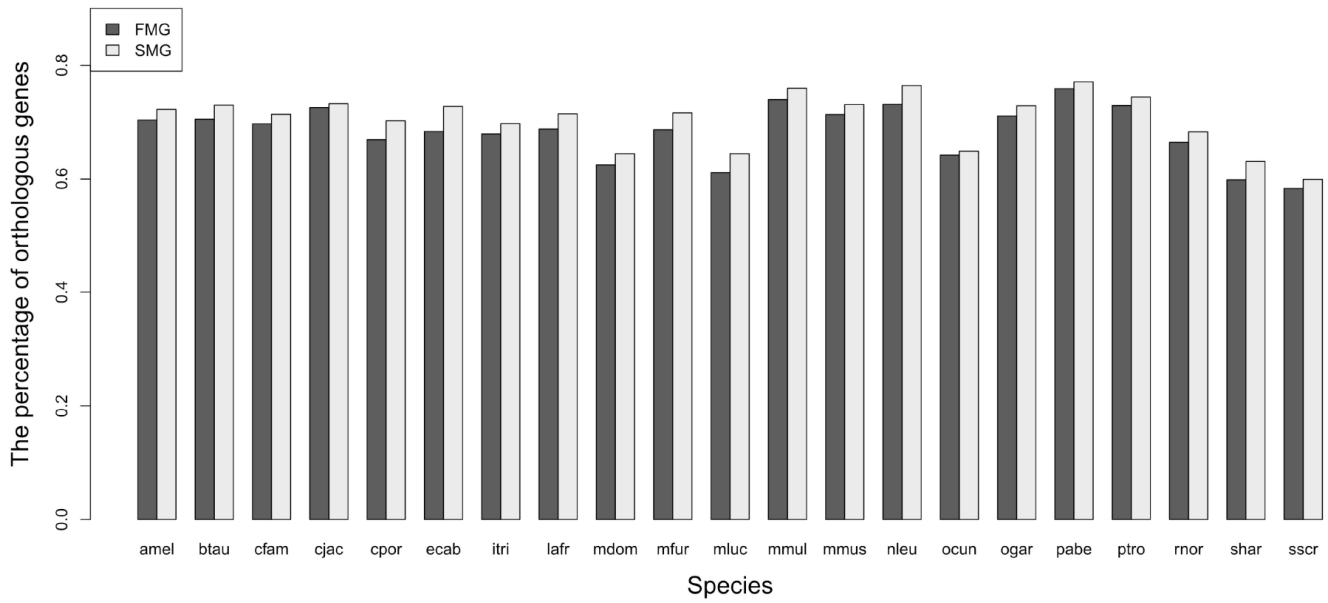

**Supplementary Figure S8-1: The bar plots of the SM genes against the FM genes in the percentage of orthologous genes for each of the 21 species.**



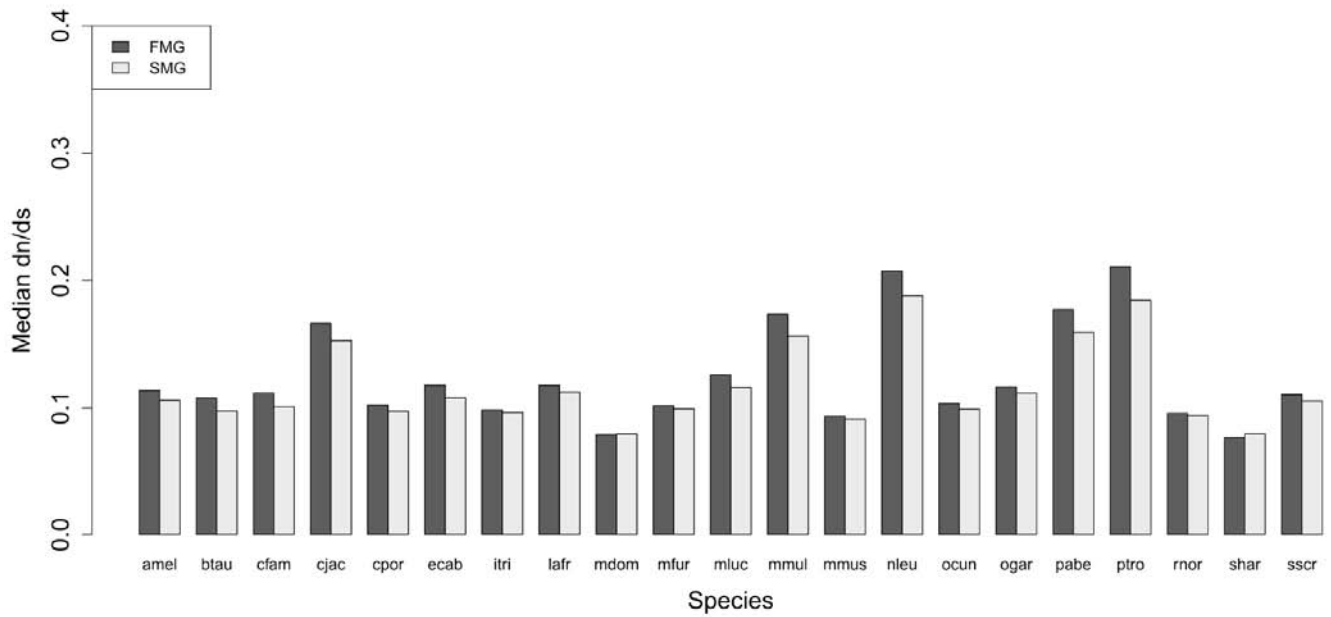

Supplementary Figure S8-2: The bar plots of the SM genes against the FM genes in the evolutionary rate for each of the 21 species.

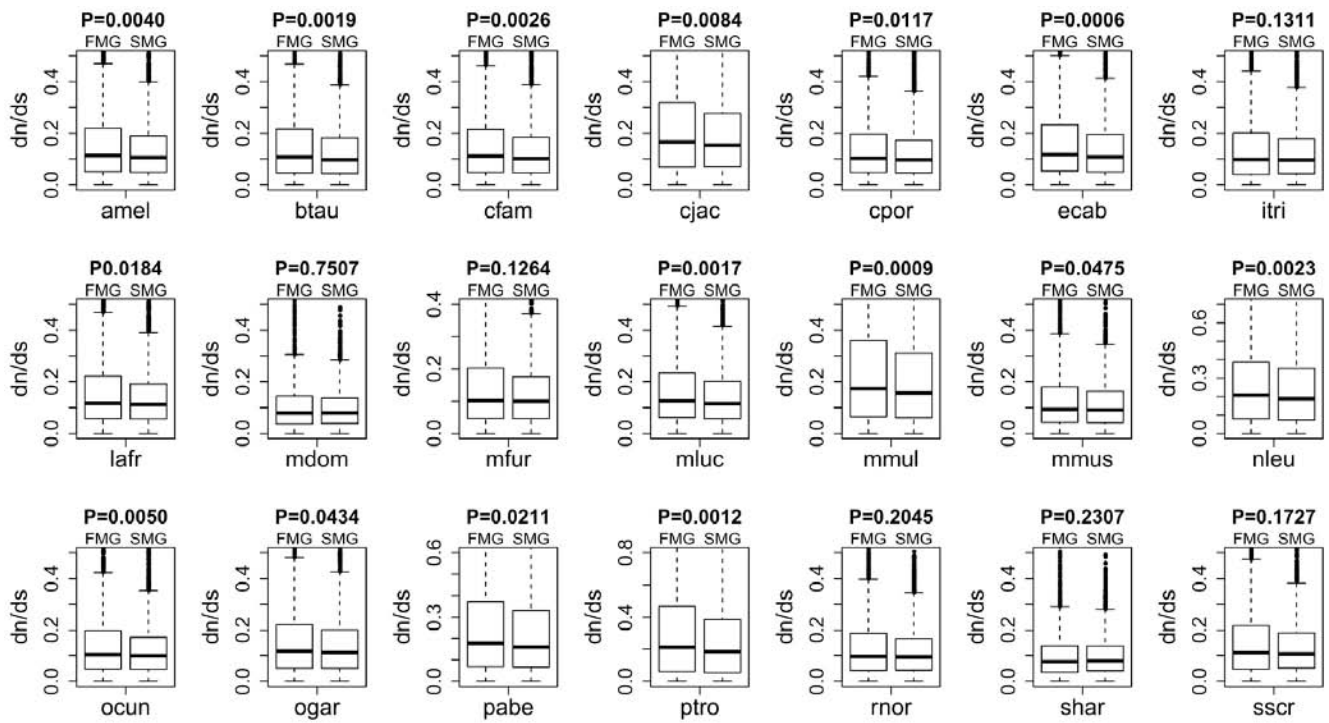

Supplementary Figure S8-3: The box plots of the SM genes against the FM genes in the evolutionary rate for each of the 21 species.

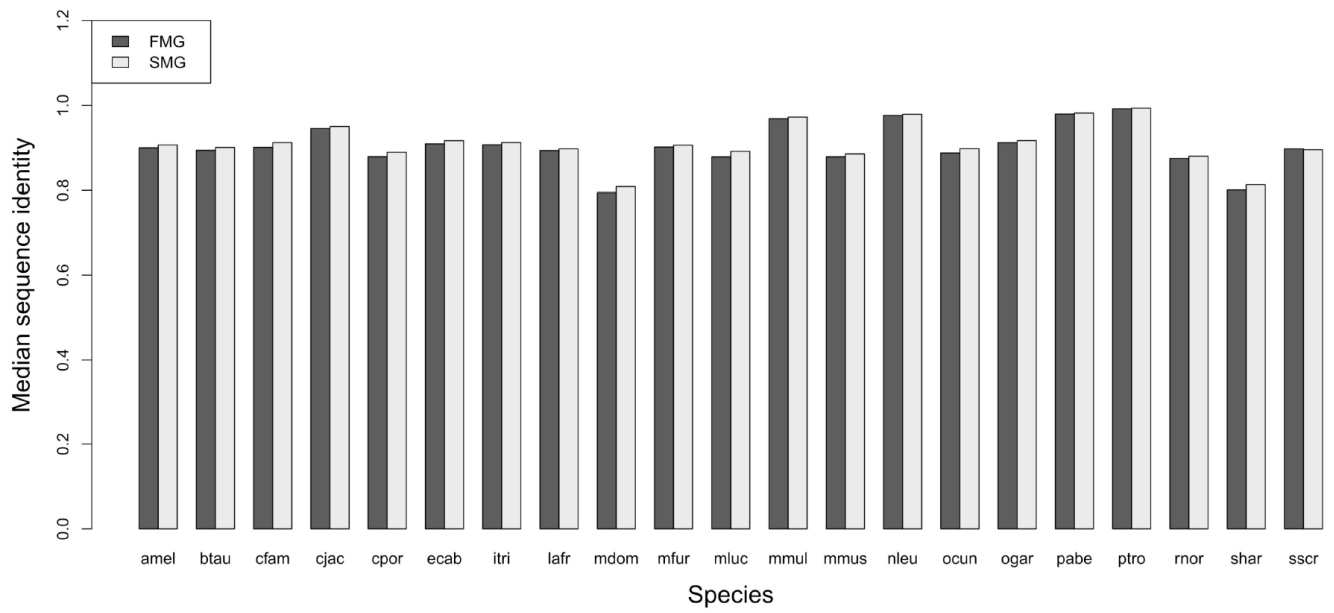

**Supplementary Figure S8-4: The bar plots of the SM genes against the FM genes in the sequence identity for each of the 21 species.**

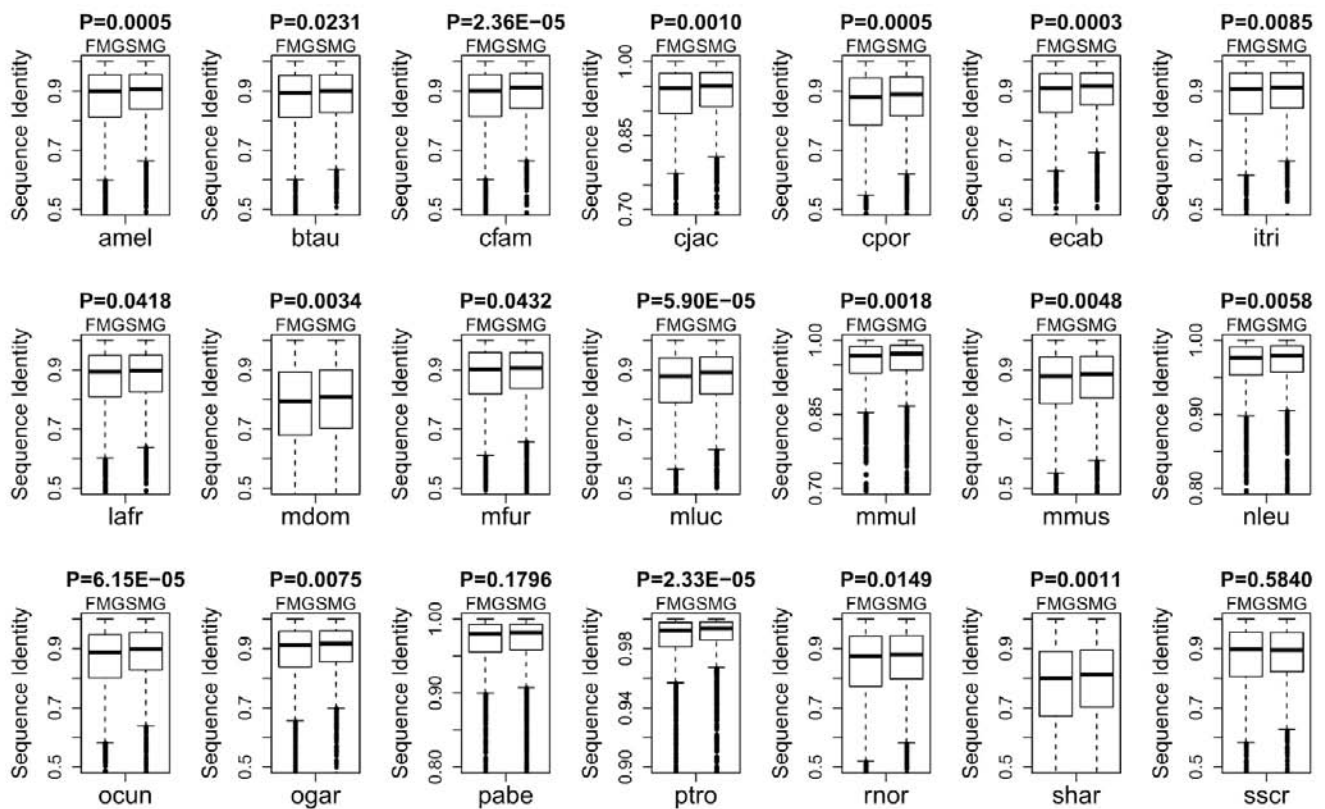

Supplementary Figure S8-5: The box plots of the SM genes against the FM genes in the sequence identity for each of the 21 species.

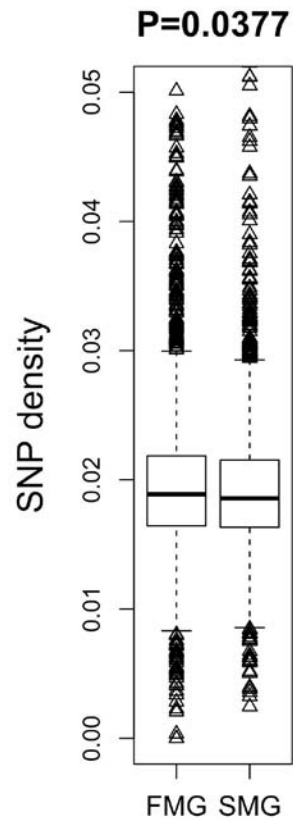

Supplementary Figure S8-6: The box plot of the SM genes against the FM genes in the SNP density.

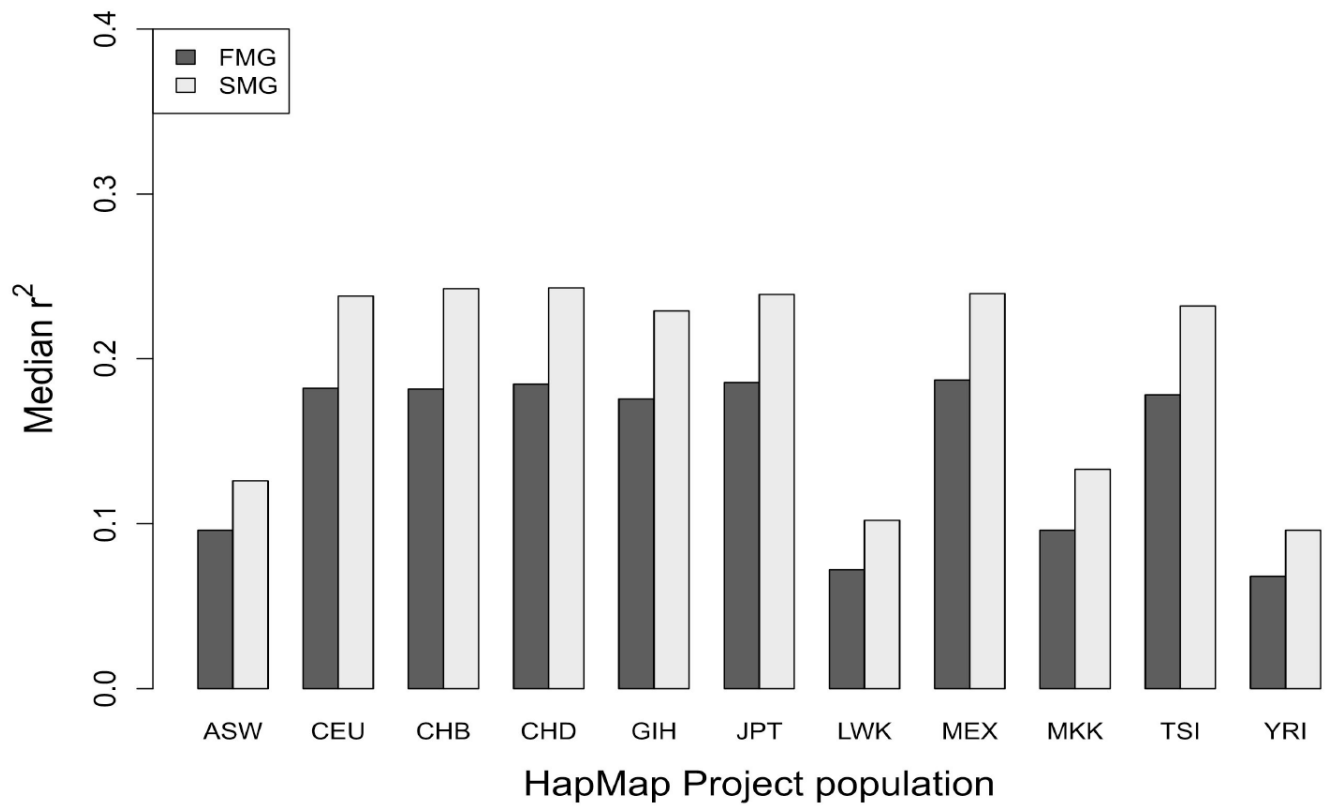

Supplementary Figure S8-7: The bar plots of the SM genes against the FM genes in the LD coefficient  $r^2$  for each of the 11 populations of HapMap Project.

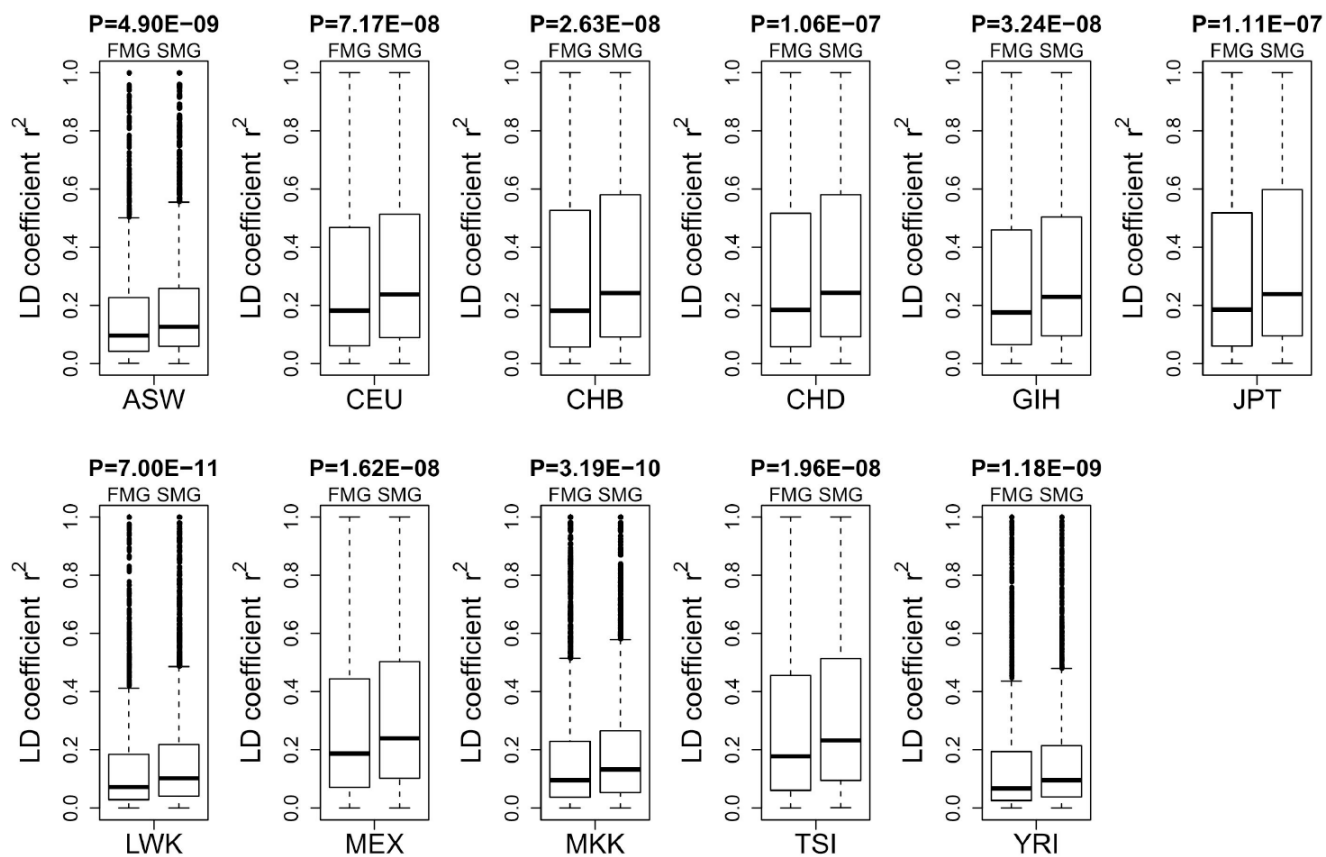

Supplementary Figure S8-8: The box plots of the SM genes against the FM genes in the LD coefficient  $r^2$  for each of the 11 populations of HapMap Project.

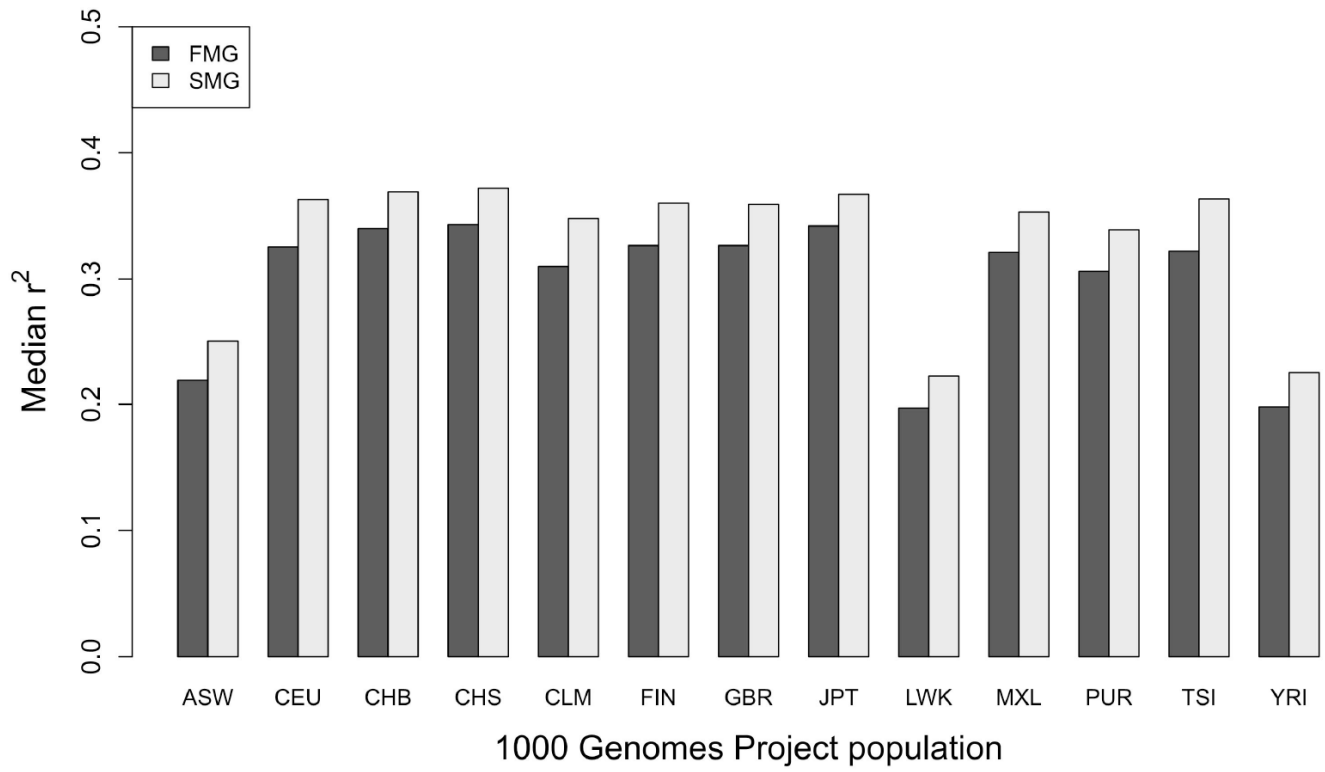

**Supplementary Figure S8-9: The bar plots of the SM genes against the FM genes in the LD coefficient  $r^2$  for each of the 13 populations of 1000 Genomes Project.**



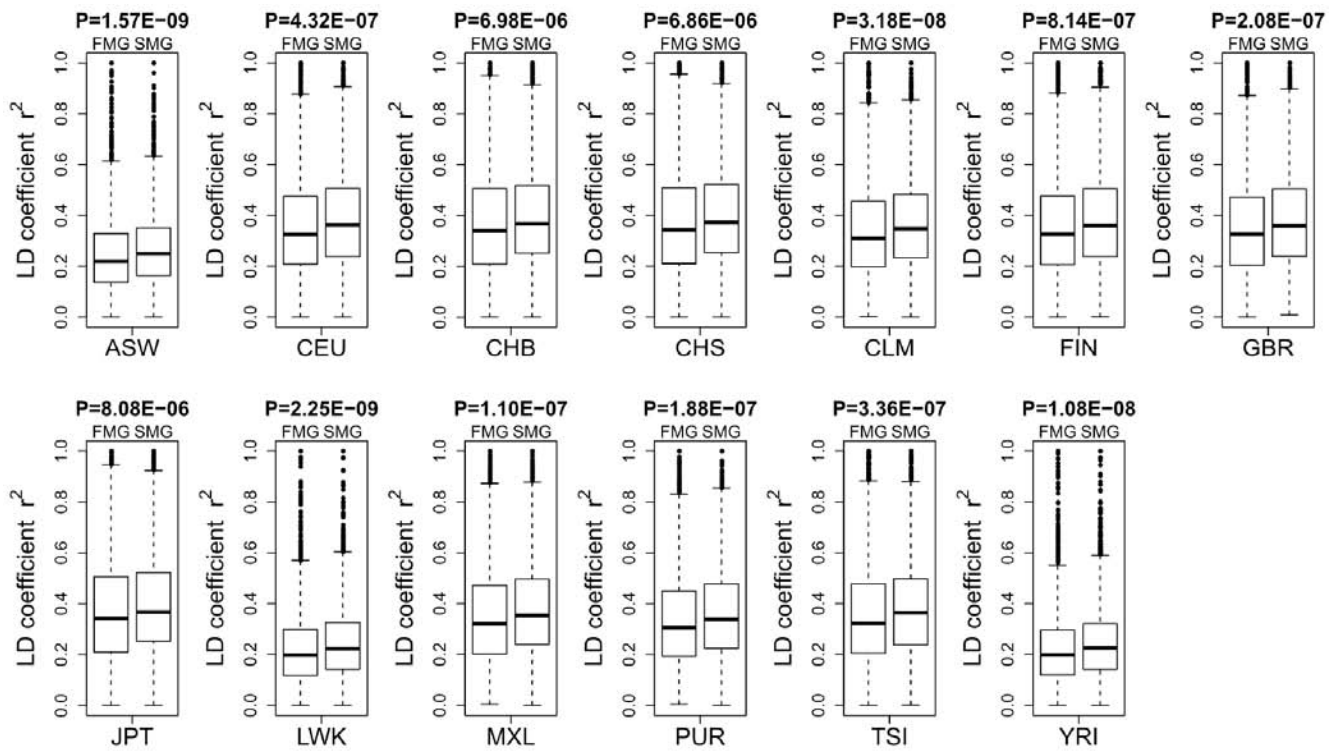

Supplementary Figure S8-10: The box plots of the SM genes against the FM genes in the LD coefficient  $r^2$  for each of the 13 populations of 1000 Genomes Project.

**Supplementary Table S8-1: Summary statistics for the comparisons of dn/ds in 21 species**

**Supplementary Table S8-2. Summary statistics for the comparisons of sequence identity in 21 species.**

**Supplementary Table S8-3: Summary statistics for the comparisons of  $r^2$  in HapMap population**

**Supplementary Table S8-4: Summary statistics for the comparisons of  $r^2$  in 1000 genomes populations**

**SECTION 9: COMPARISON OF EVOLUTIONARY CONSERVATION BETWEEN SM (TOP 20%) AND FM GENES (BOTTOM 20%) USING 5'UTR DATA**

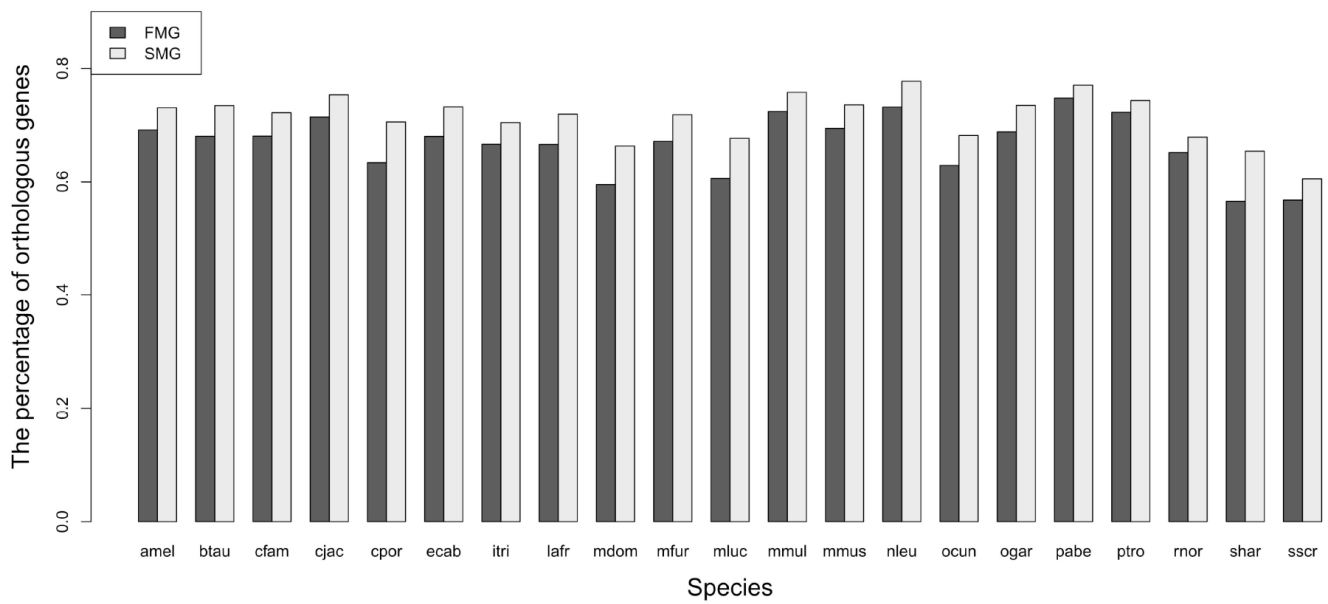

**Supplementary Figure S9-1: The bar plots of the SM genes against the FM genes in the percentage of orthologous genes for each of the 21 species.**

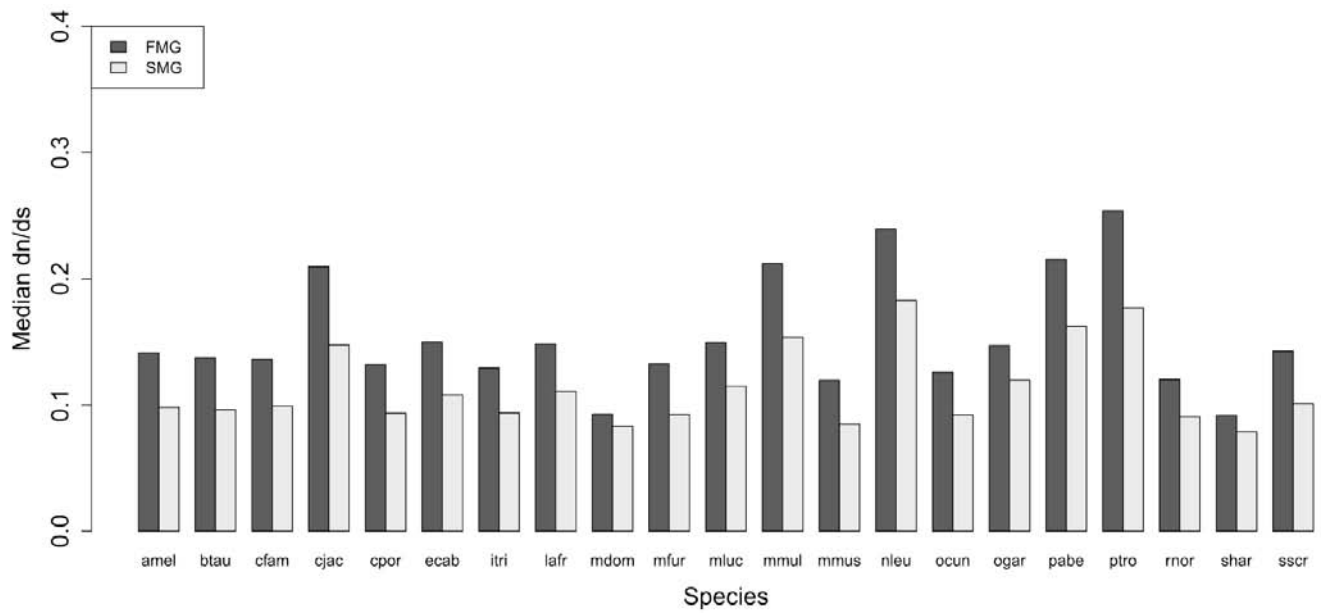

Supplementary Figure S9-2: The bar plots of the SM genes against the FM genes in the evolutionary rate for each of the 21 species.

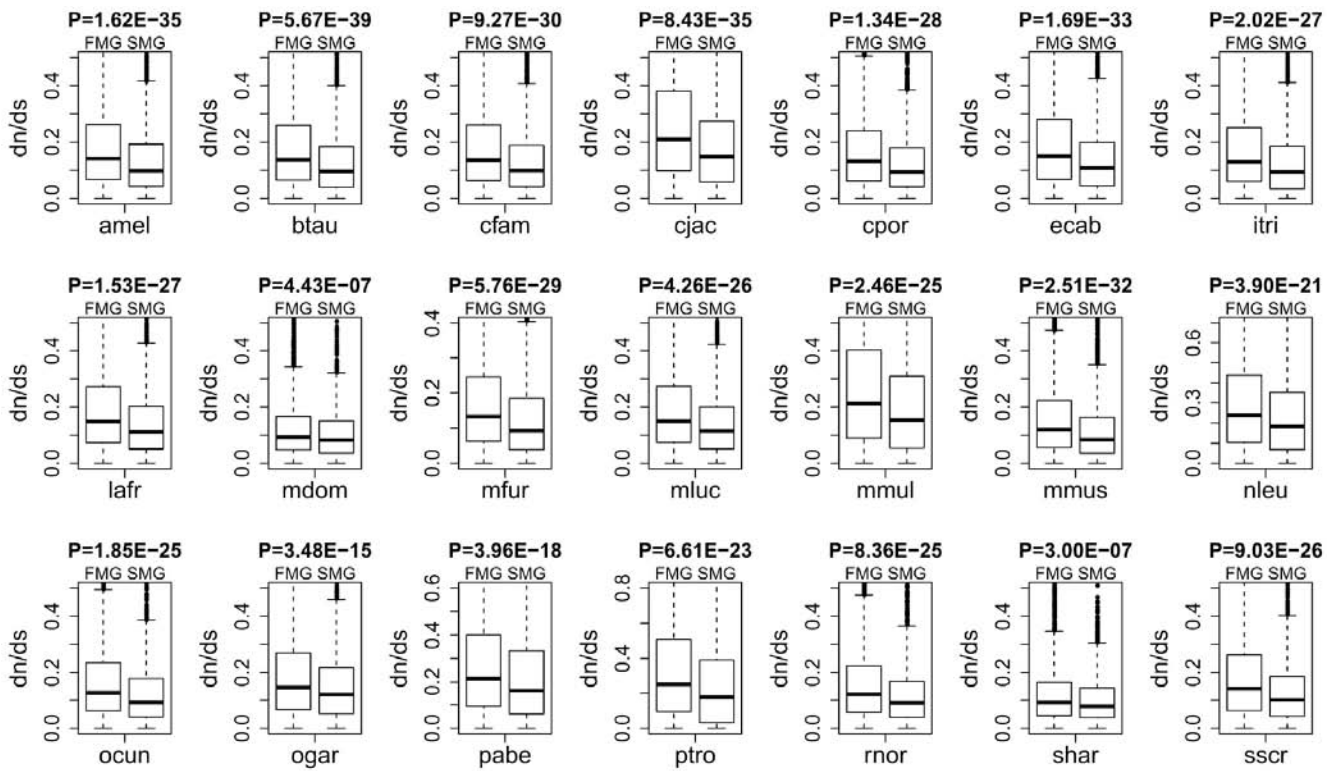

Supplementary Figure S9-3: The box plots of the SM genes against the FM genes in the evolutionary rate for each of the 21 species.

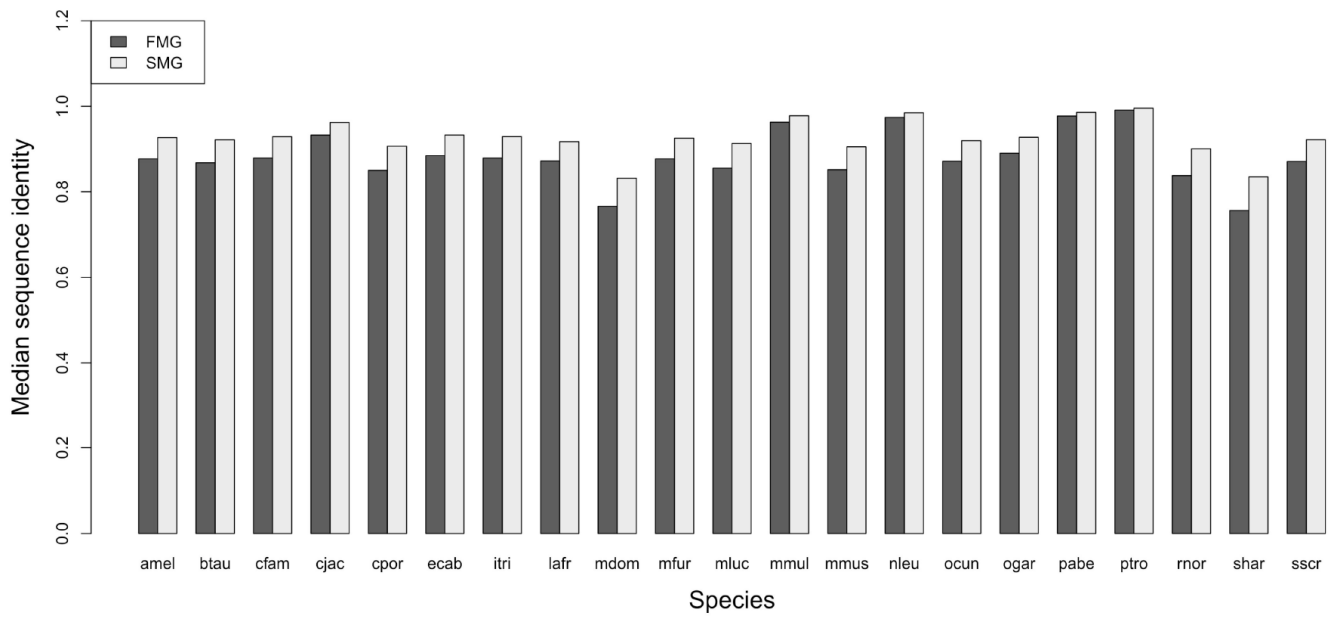

Supplementary Figure S9-4: The bar plots of the SM genes against the FM genes in the sequence identity for each of the 21 species.

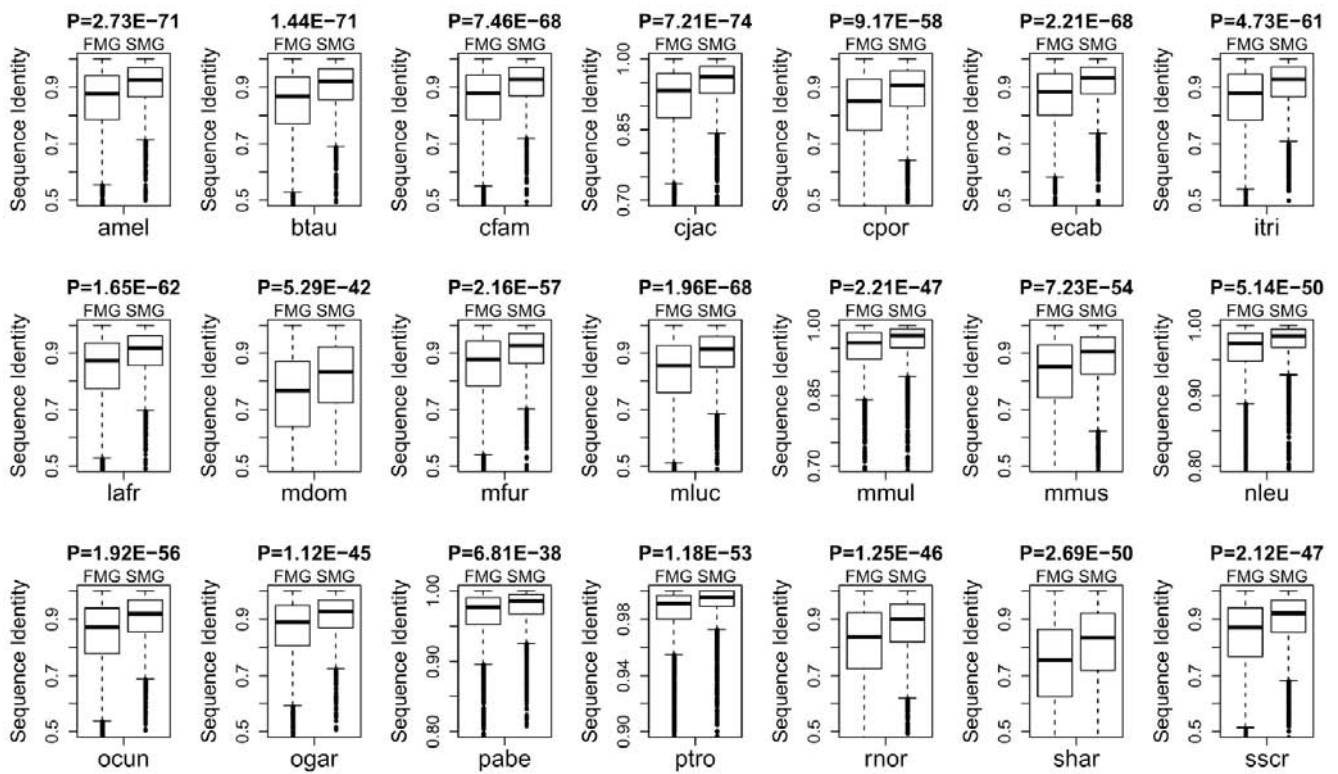

Supplementary Figure S9-5: The box plots of the SM genes against the FM genes in the sequence identity for each of the 21 species.

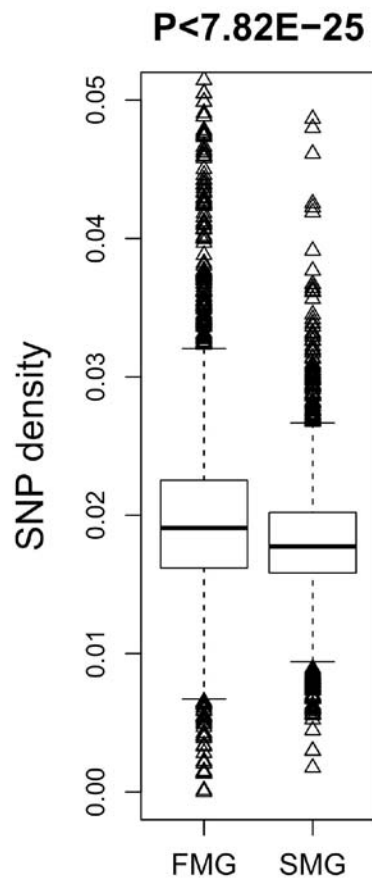

Supplementary Figure S9-6: The box plot of the SM genes against the FM genes in the SNP density.



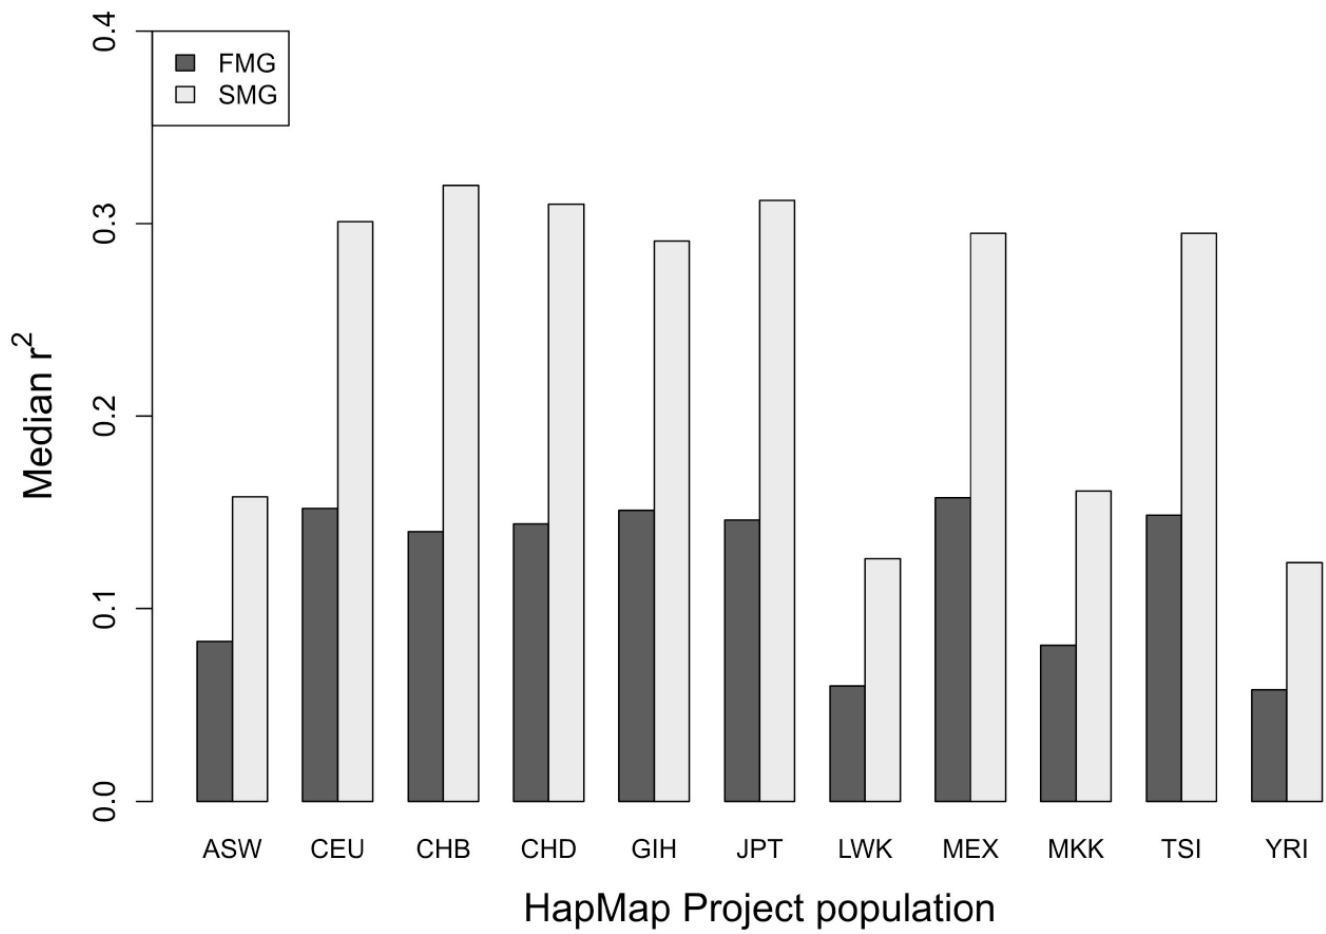

Supplementary Figure S9-7: The bar plots of the SM genes against the FM genes in the LD coefficient  $r^2$  for each of the 11 populations of HapMap Project.

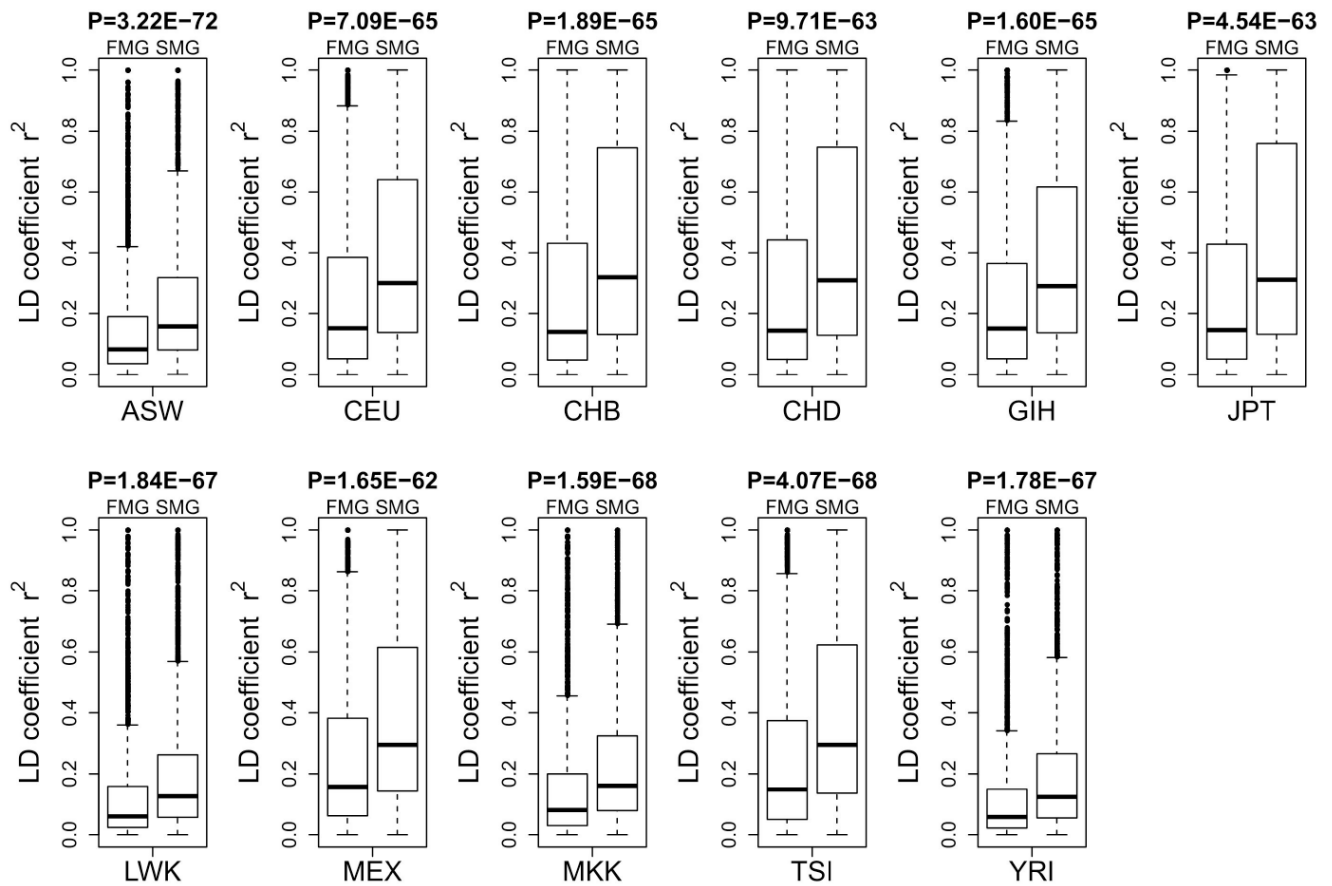

Supplementary Figure S9-8: The box plots of the SM genes against the FM genes in the LD coefficient  $r^2$  for each of the 11 populations of HapMap Project.

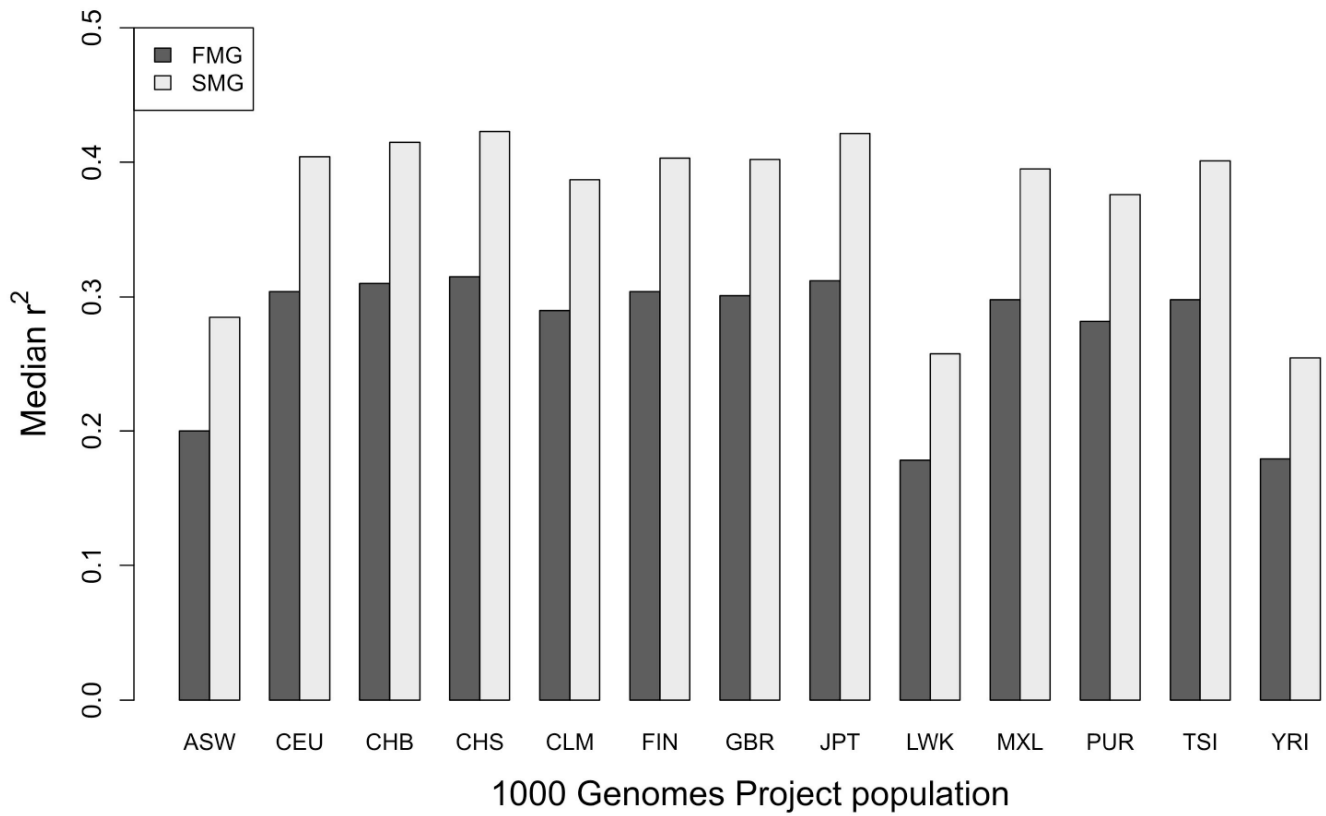

Supplementary Figure S9-9: The bar plots of the SM genes against the FM genes in the LD coefficient  $r^2$  for each of the 13 populations of 1000 Genomes Project.

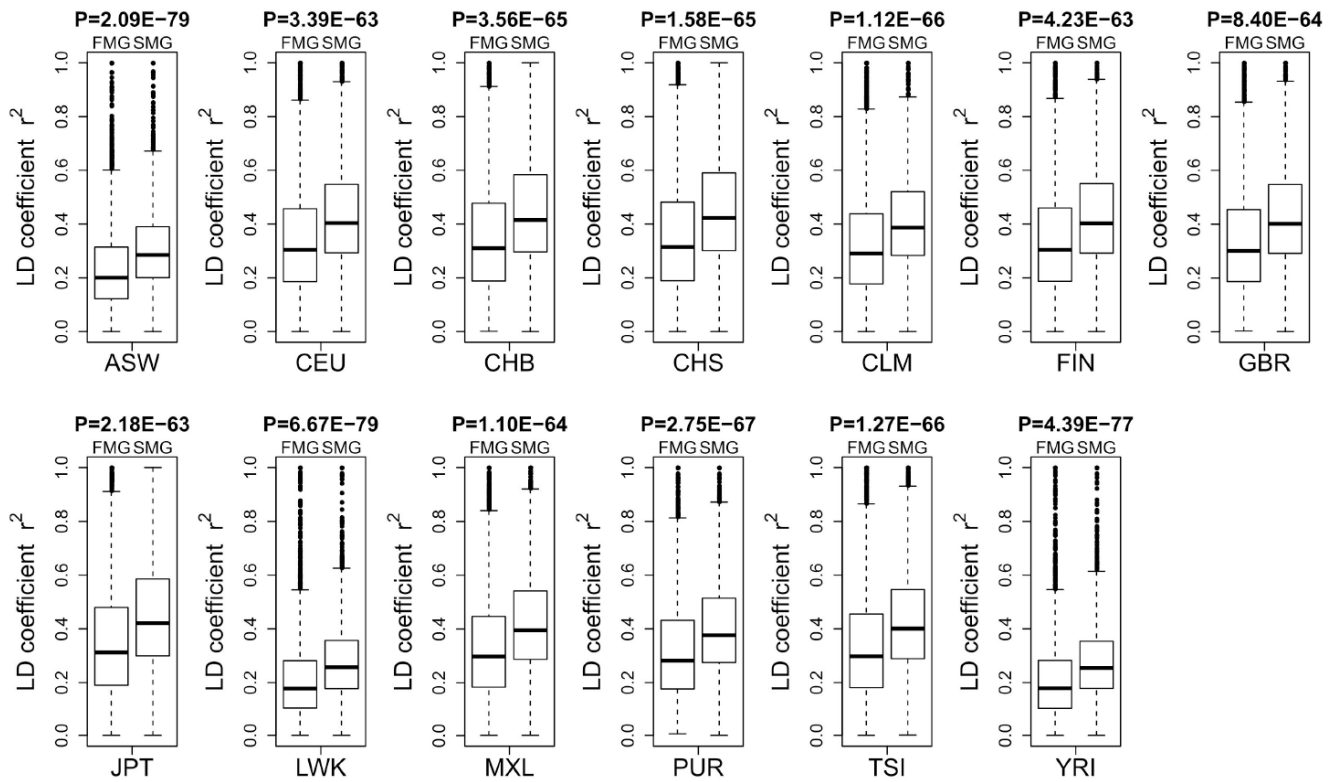

Supplementary Figure S9-10: The box plots of the SM genes against the FM genes in the LD coefficient  $r^2$  for each of the 13 populations of 1000 Genomes Project.

**Supplementary Table S9-1: Summary statistics for the comparisons of dn/ds in 21 species**

**Supplementary Table S9-2. Summary statistics for the comparisons of sequence identity in 21 species.**

**Supplementary Table S9-3: Summary statistics for the comparisons of  $r^2$  in HapMap population**

**Supplementary Table S9-4: Summary statistics for the comparisons of  $r^2$  in 1000 genomes populations**

**SECTION 10: COMPARISON OF EVOLUTIONARY CONSERVATION BETWEEN SM (TOP 20%) AND FM GENES (BOTTOM 20%) USING TSS1500 DATA**

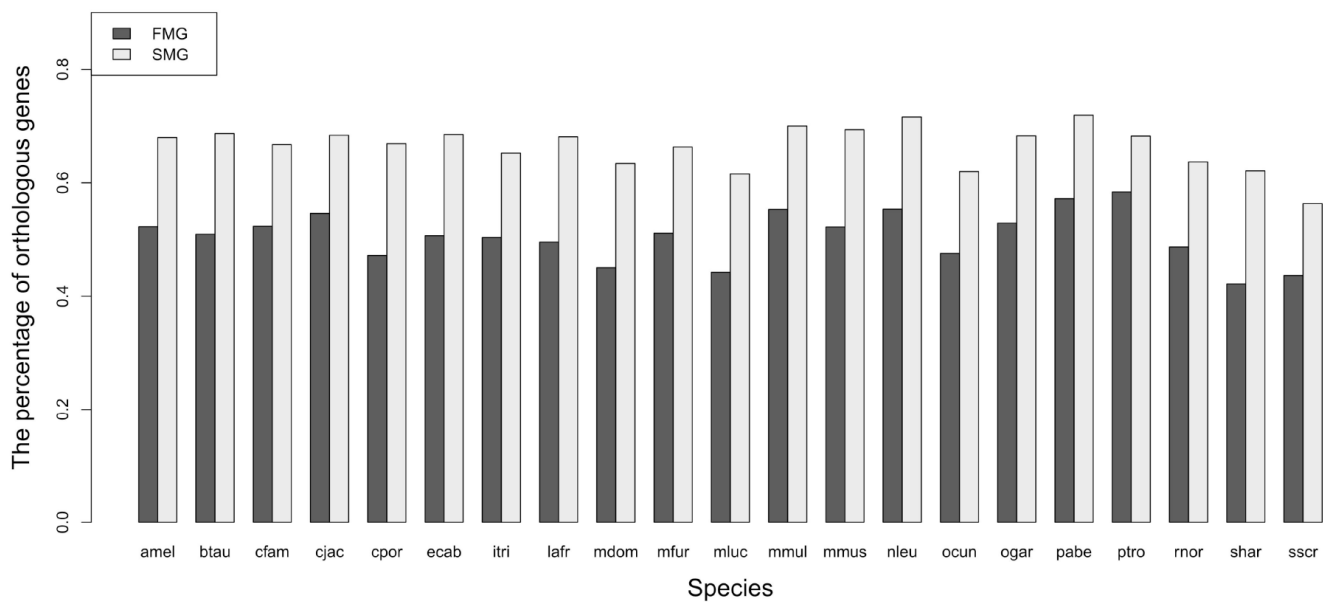

**Supplementary Figure S10-1: The bar plots of the SM genes against the FM genes in the percentage of orthologous genes for each of the 21 species.**

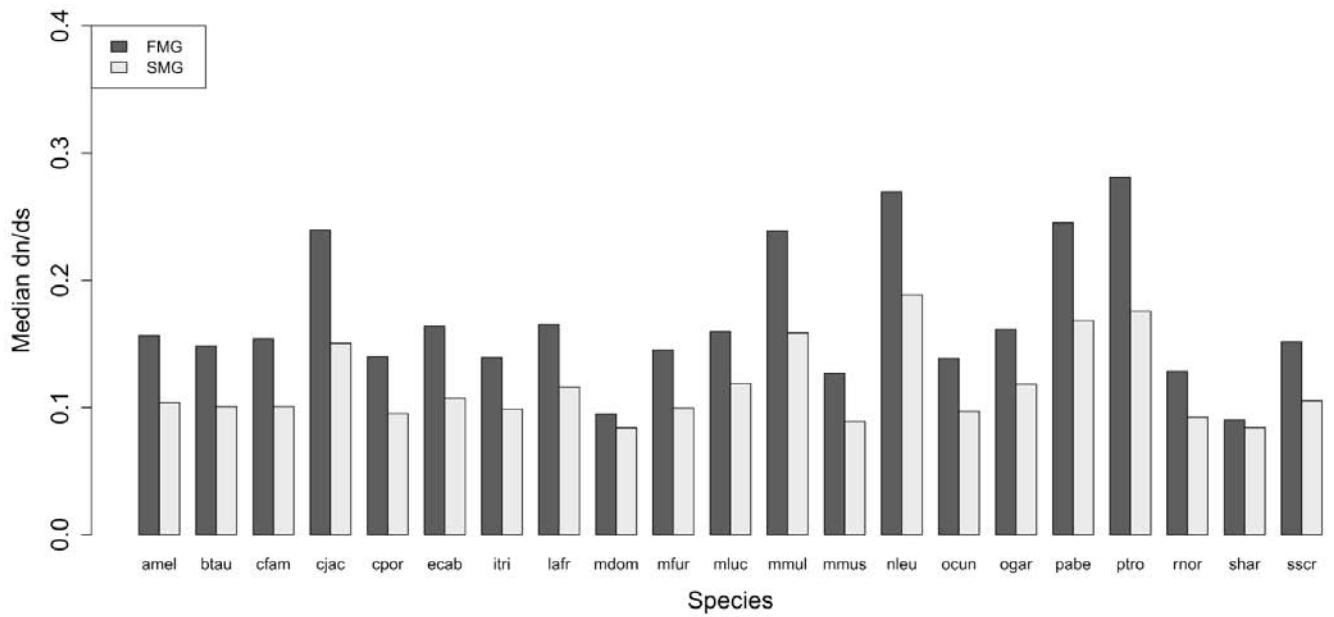

Supplementary Figure S10-2: The bar plots of the SM genes against the FM genes in the evolutionary rate for each of the 21 species.

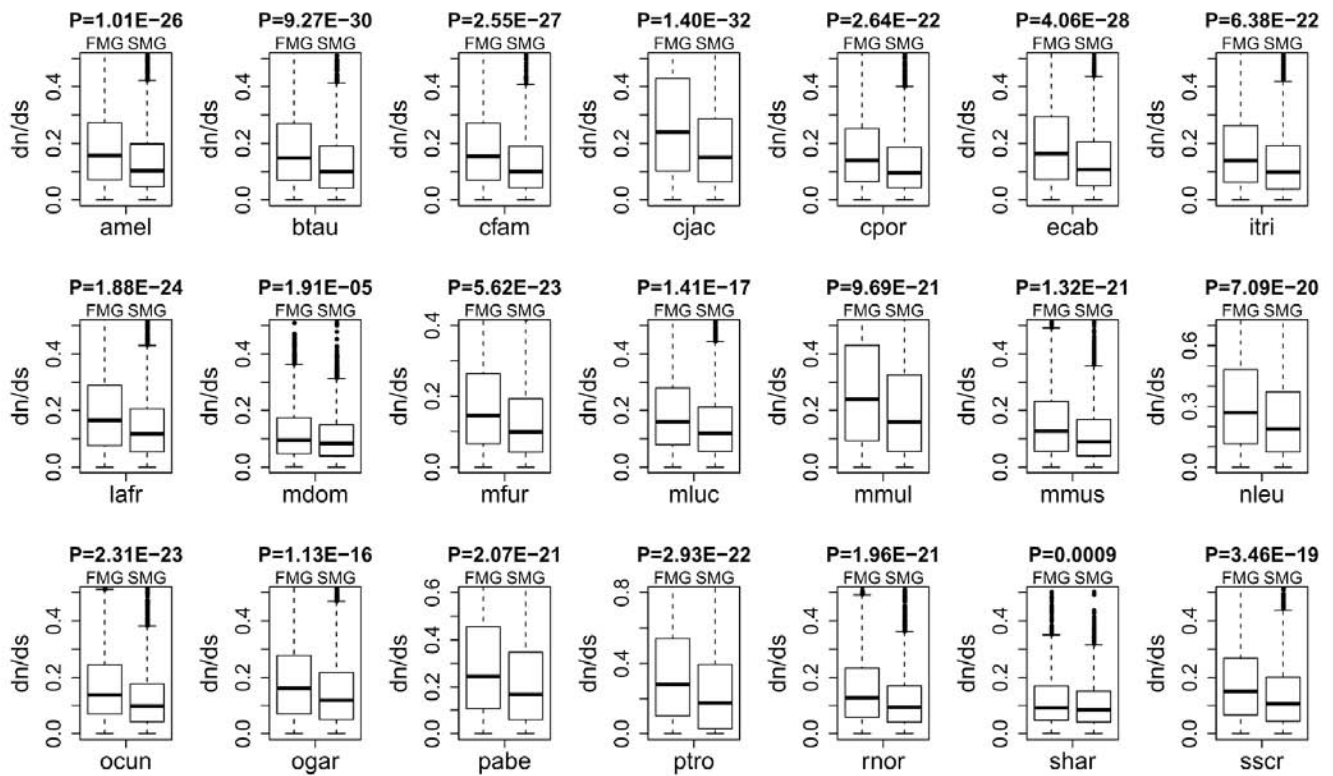

Supplementary Figure S10-3: The box plots of the SM genes against the FM genes in the evolutionary rate for each of the 21 species.



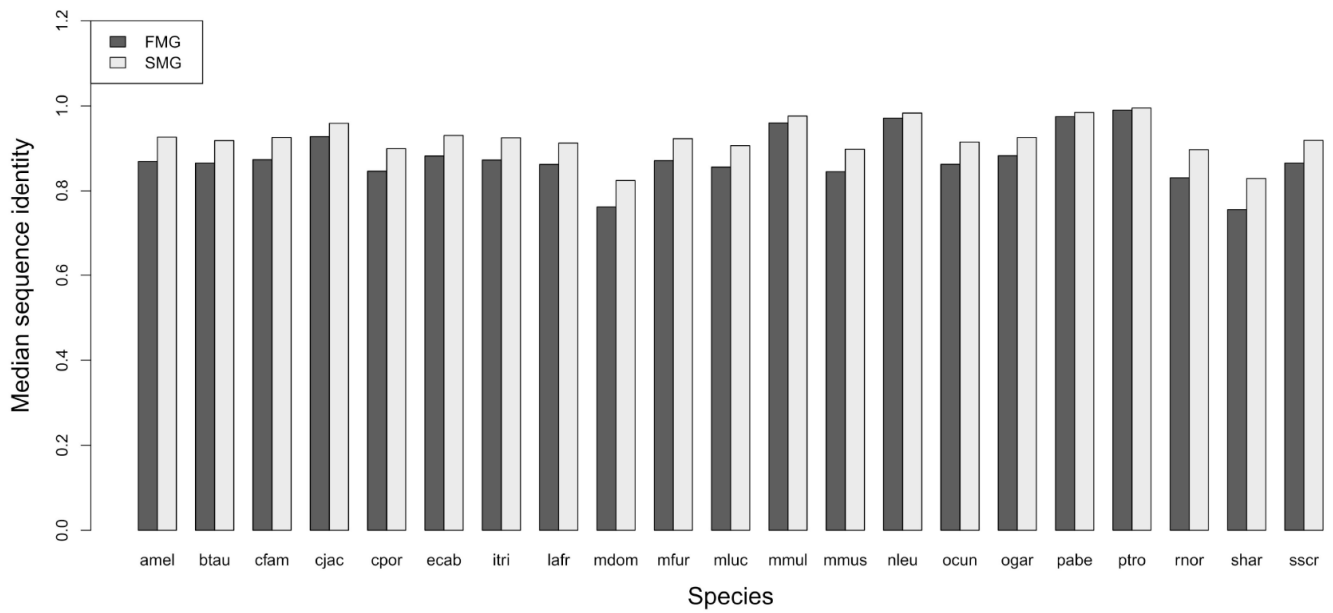

**Supplementary Figure S10-4: The bar plots of the SM genes against the FM genes in the sequence identity for each of the 21 species.**

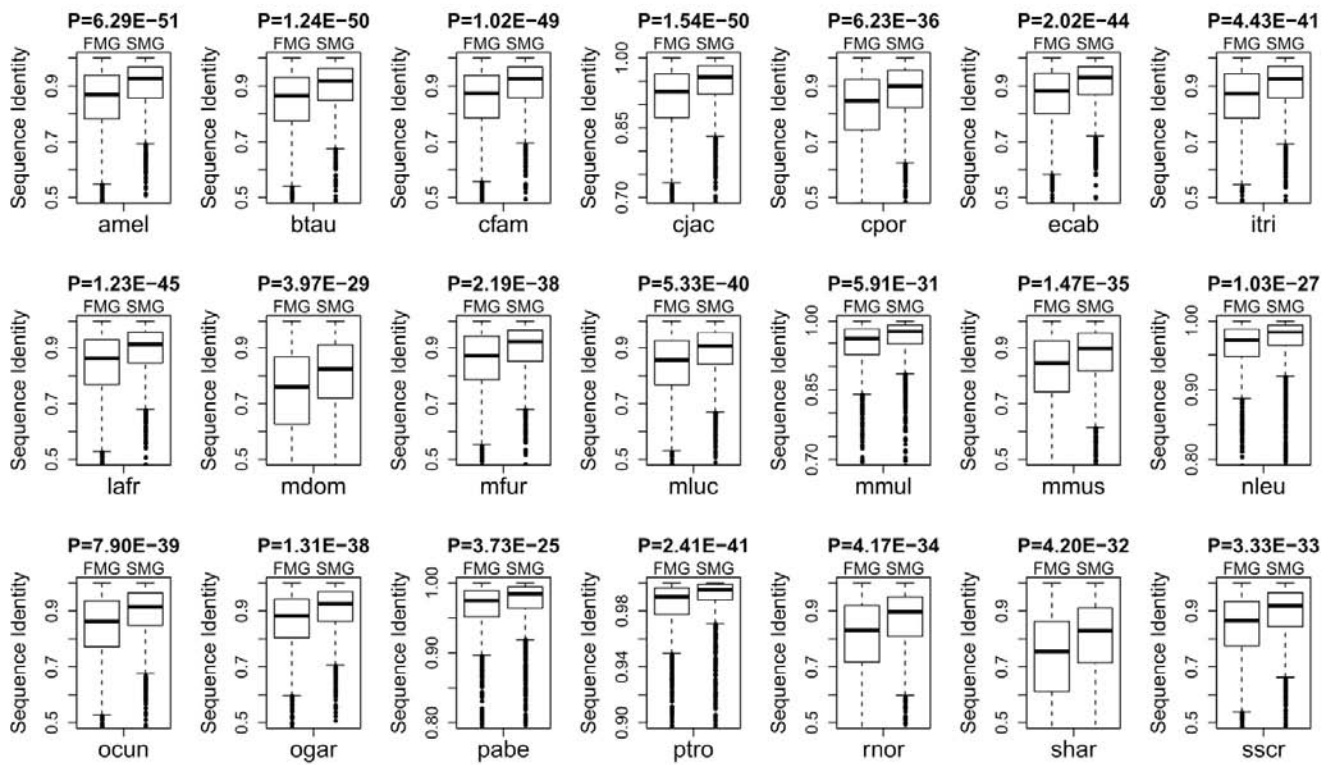

Supplementary Figure S10-5: The box plots of the SM genes against the FM genes in the sequence identity for each of the 21 species.

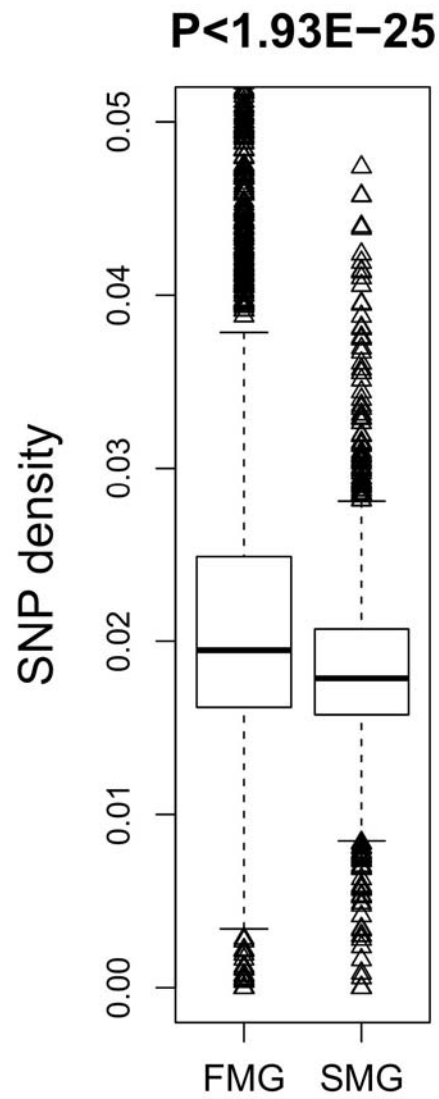

Supplementary Figure S10-6: The box plot of the SM genes against the FM genes in the SNP density.

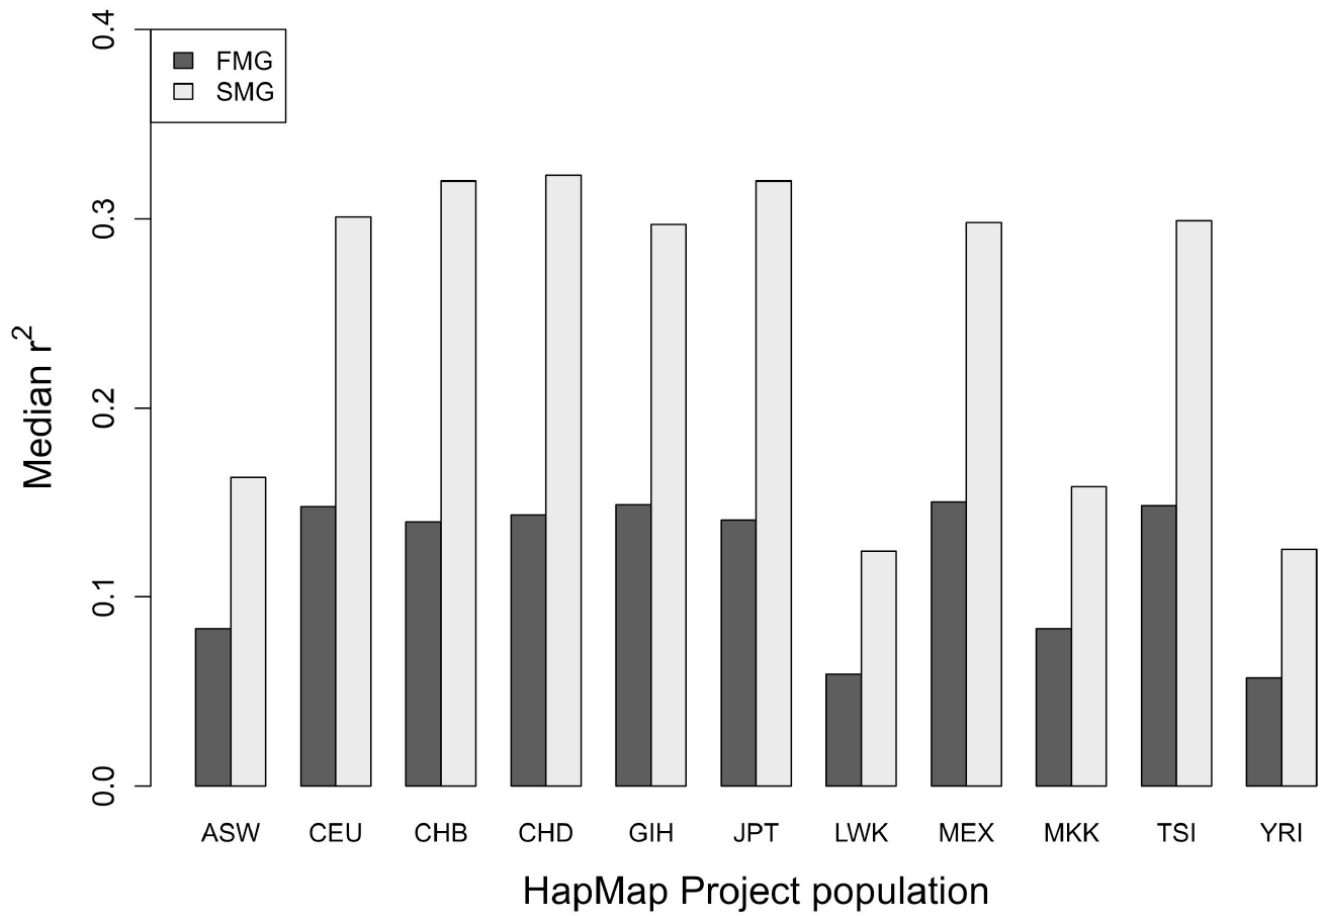

Supplementary Figure S10-7: The bar plots of the SM genes against the FM genes in the LD coefficient  $r^2$  for each of the 11 populations of HapMap Project.

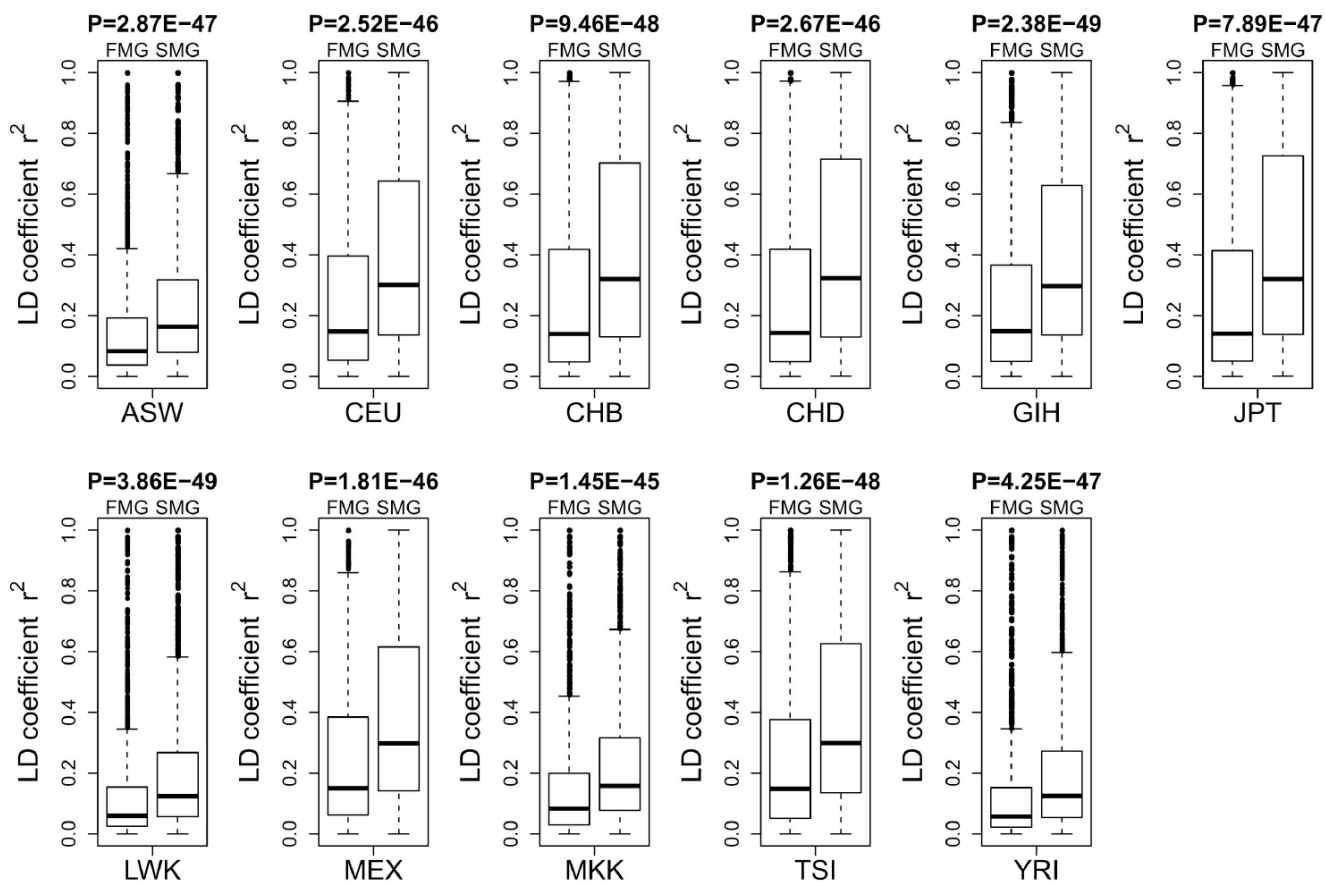

Supplementary Figure S10-8: The box plots of the SM genes against the FM genes in the LD coefficient  $r^2$  for each of the 11 populations of HapMap Project.

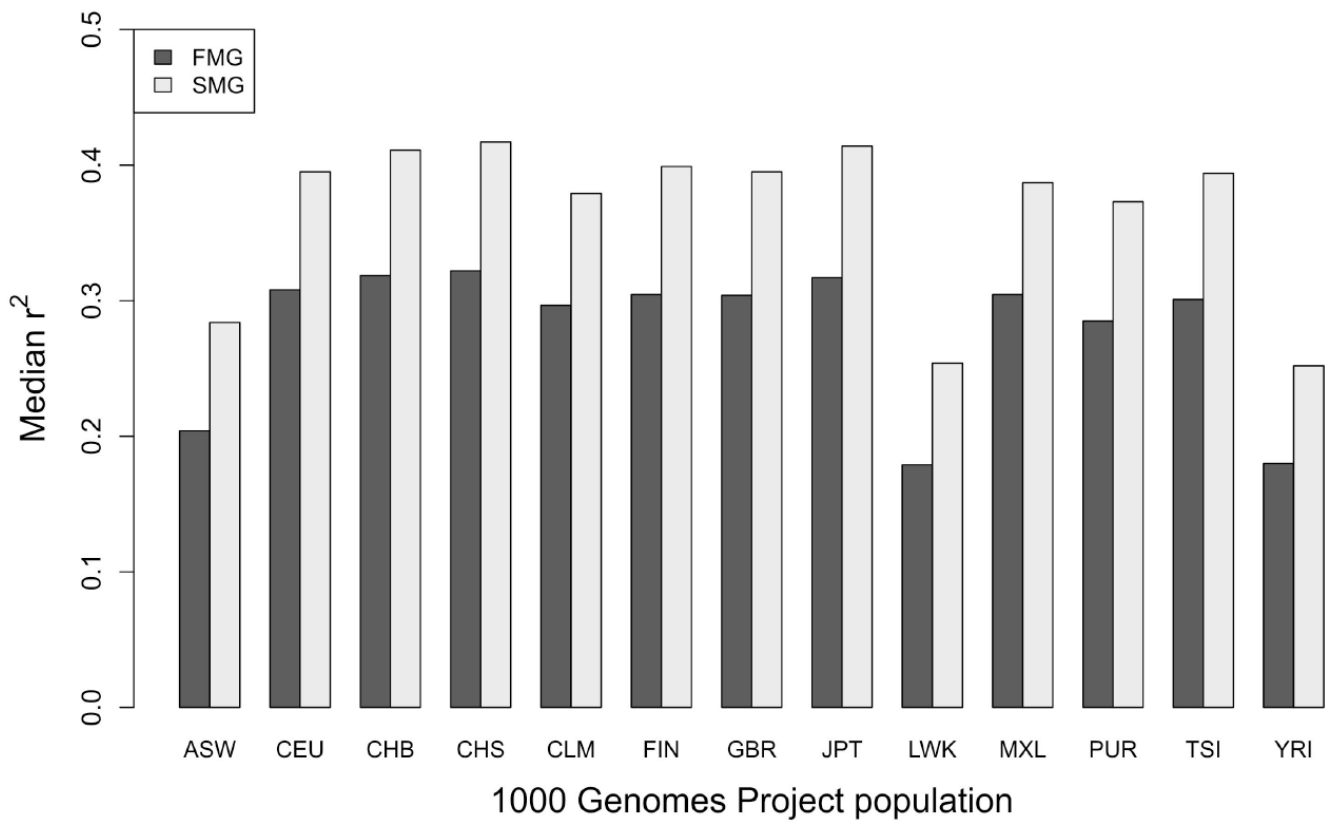

Supplementary Figure S10-9: The bar plots of the SM genes against the FM genes in the LD coefficient  $r^2$  for each of the 13 populations of 1000 Genomes Project.

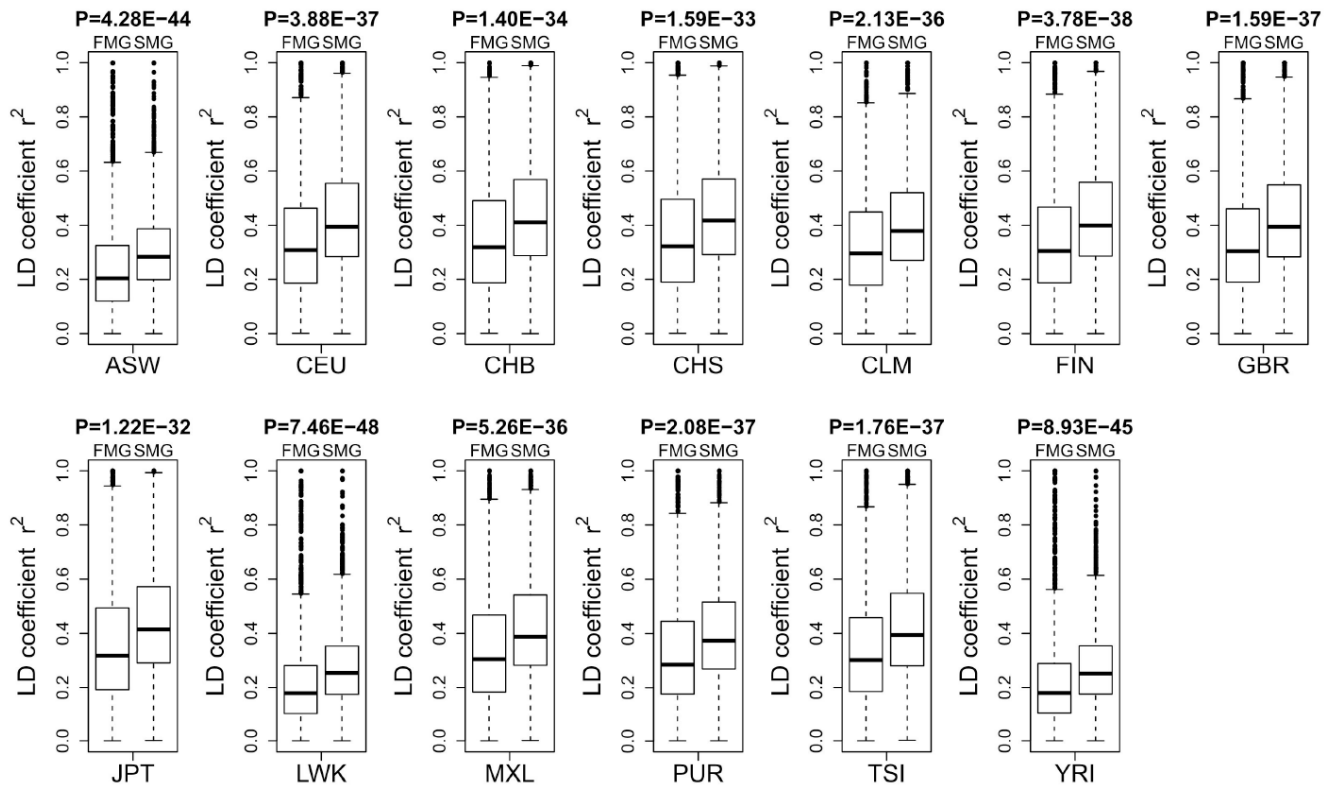

Supplementary Figure S10-10: The box plots of the SM genes against the FM genes in the LD coefficient  $r^2$  for each of the 13 populations of 1000 Genomes Project.

**Supplementary Table S10-1: Summary statistics for the comparisons of dn/ds in 21 species**

**Supplementary Table S10-2: Summary statistics for the comparisons of sequence identity in 21 species**

**Supplementary Table S10-3: Summary statistics for the comparisons of  $r^2$  in HapMap population**

**Supplementary Table S10-4: Summary statistics for the comparisons of  $r^2$  in 1000 genomes populations**



**SECTION 11: COMPARISON OF EVOLUTIONARY CONSERVATION BETWEEN SM (TOP 20%) AND FM GENES (BOTTOM 20%) USING ENCODE PROJECT DNA METHYLATION DATA**

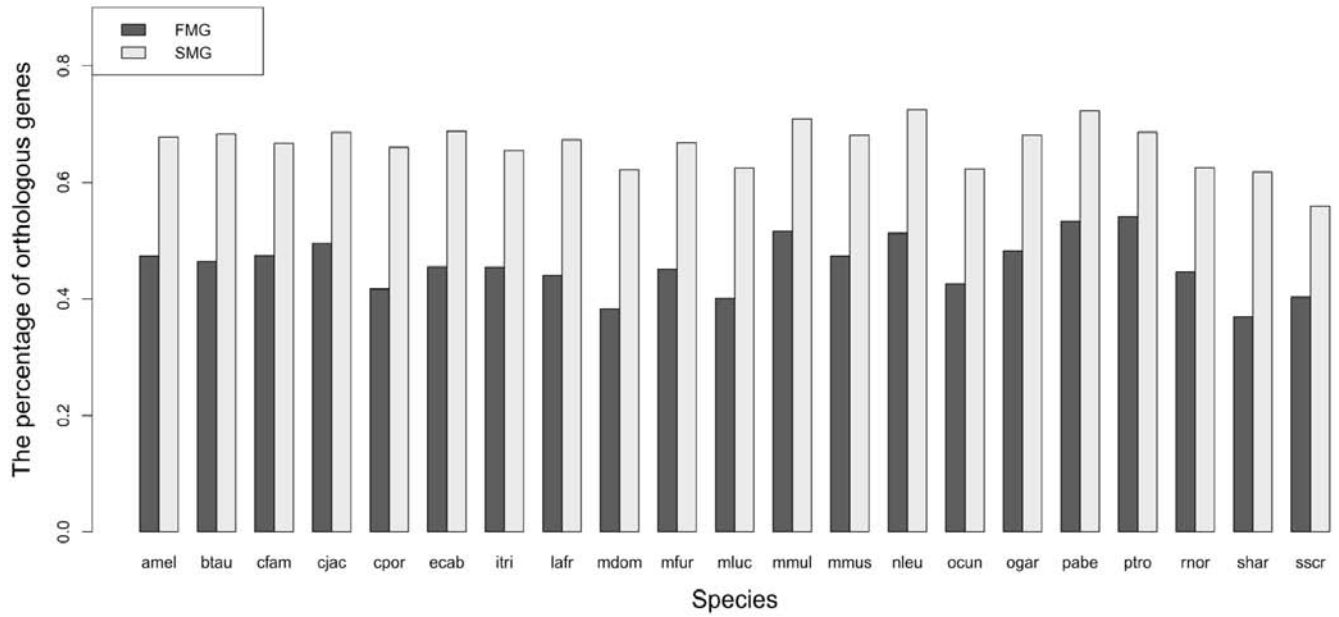

**Supplementary Figure S11-1: The bar plots of the SM genes against the FM genes in the percentage of orthologous genes for each of the 21 species.**

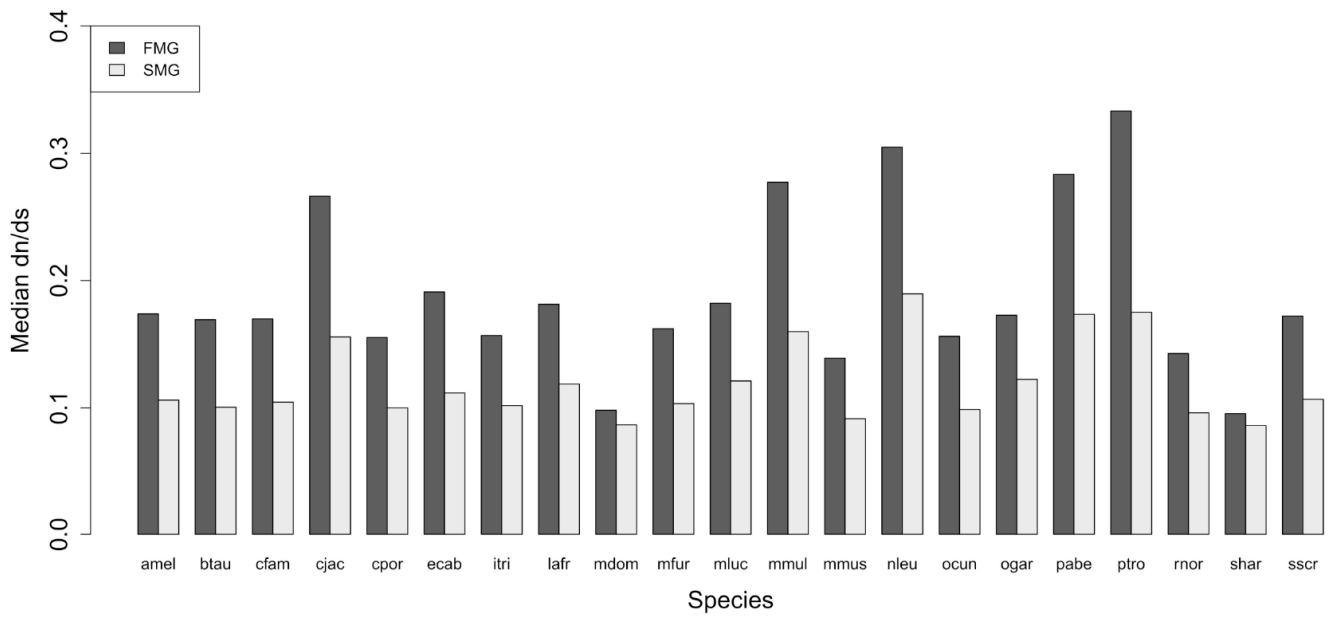

**Supplementary Figure S11-2: The bar plots of the SM genes against the FM genes in the evolutionary rate for each of the 21 species.**

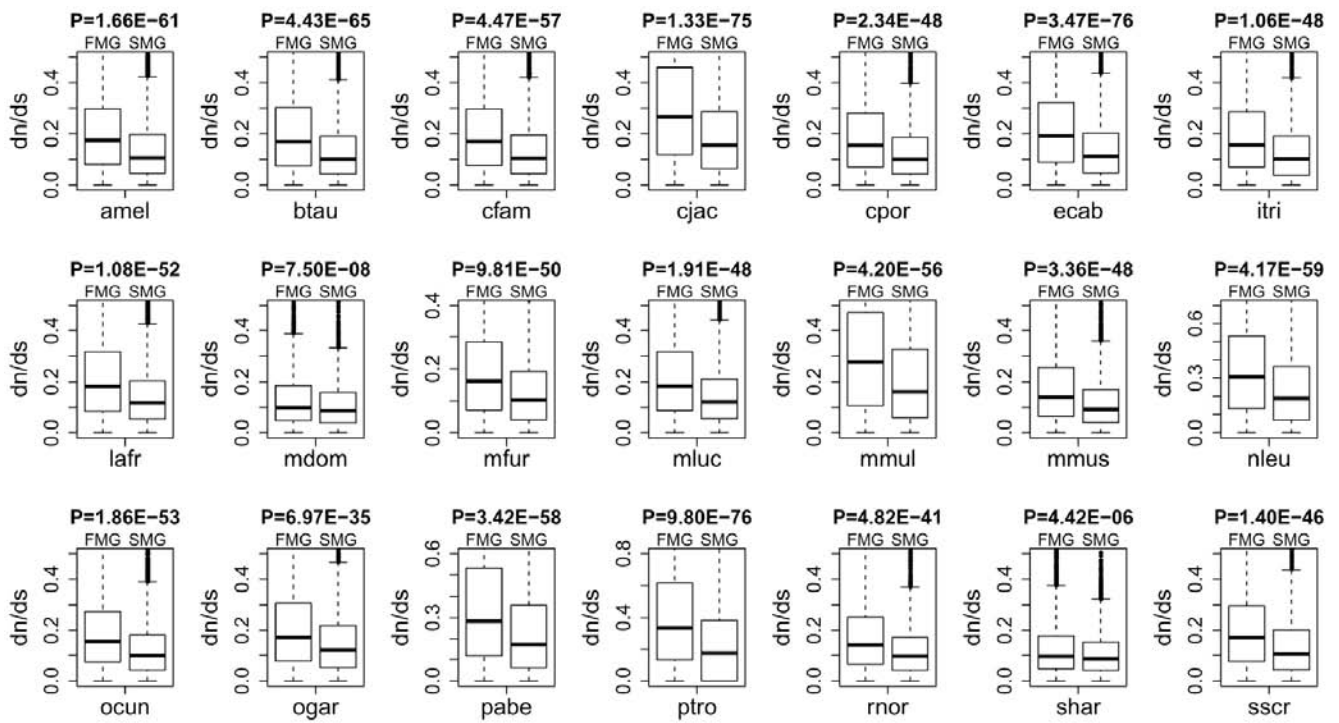

Supplementary Figure S11-3: The box plots of the SM genes against the FM genes in the evolutionary rate for each of the 21 species.

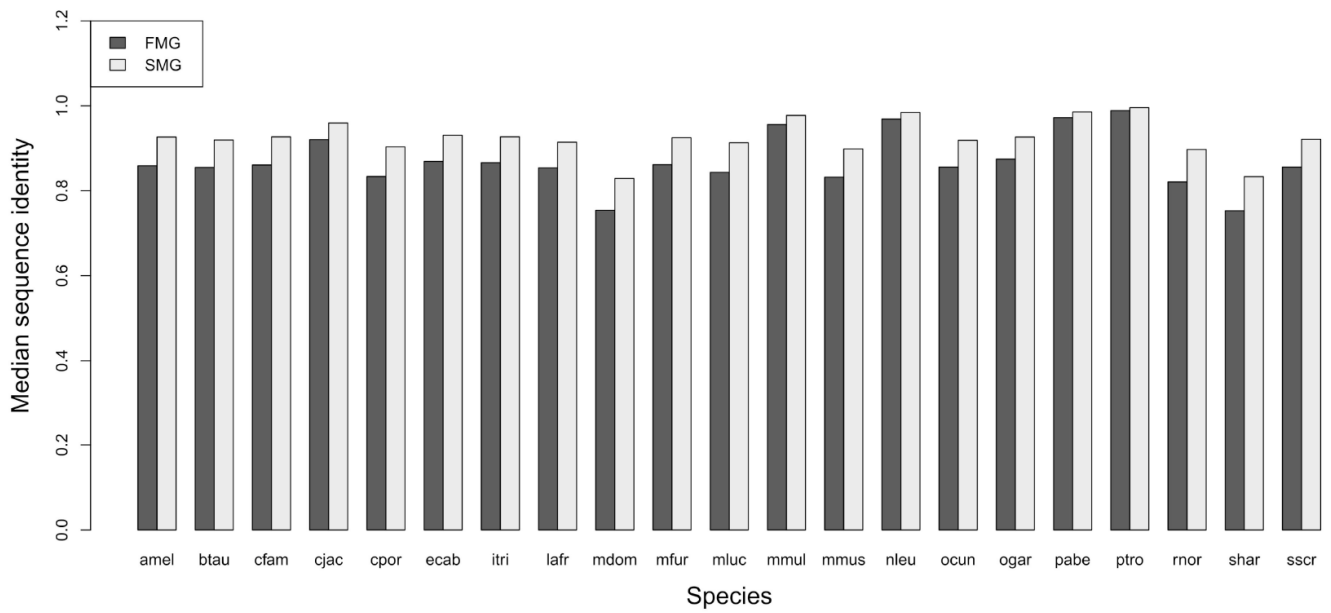

**Supplementary Figure S11-4: The box plots of the SM genes against the FM genes in the sequence identity for each of the 21 species.**

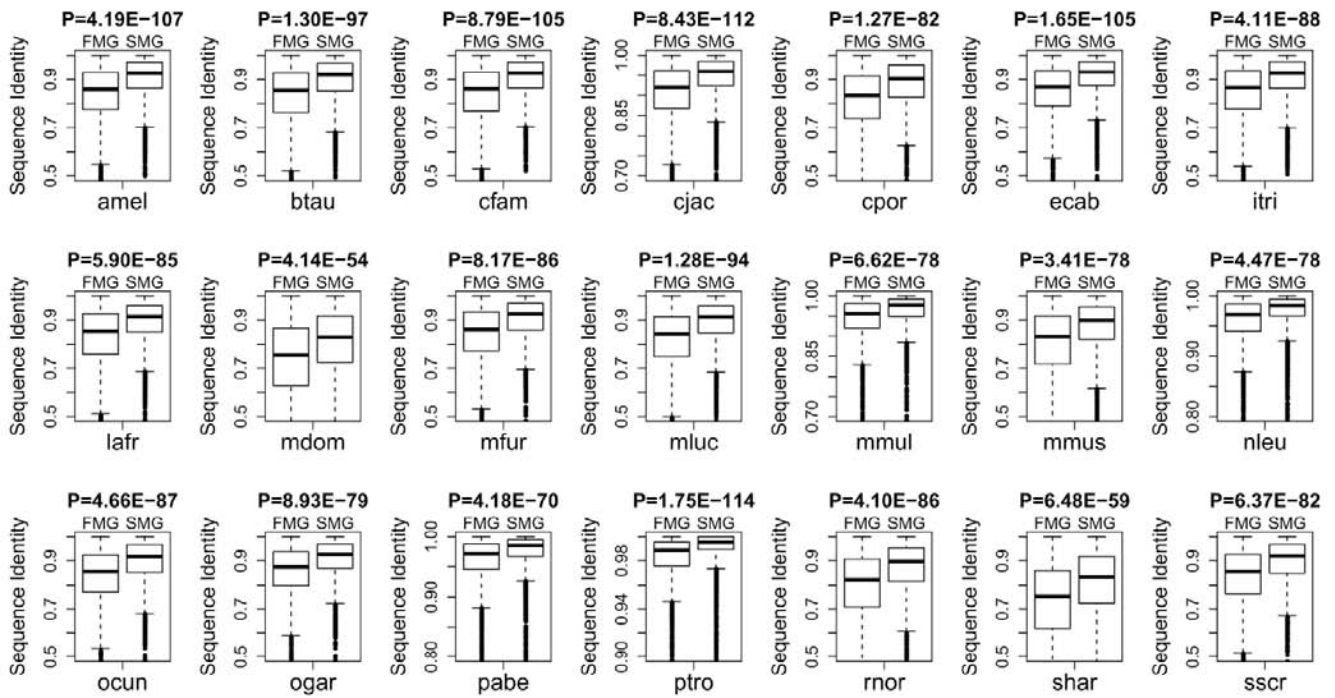

Supplementary Figure S11-5: The bar plots of the SM genes against the FM genes in the sequence identity for each of the 21 species.

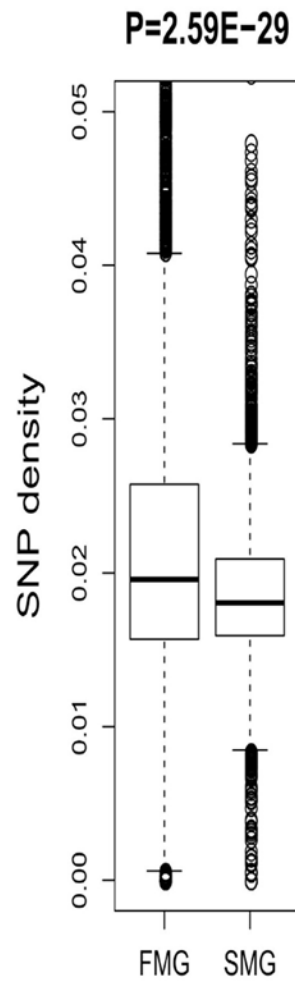

Supplementary Figure S11-6: The box plot of the SM genes against the FM genes in the SNP density.

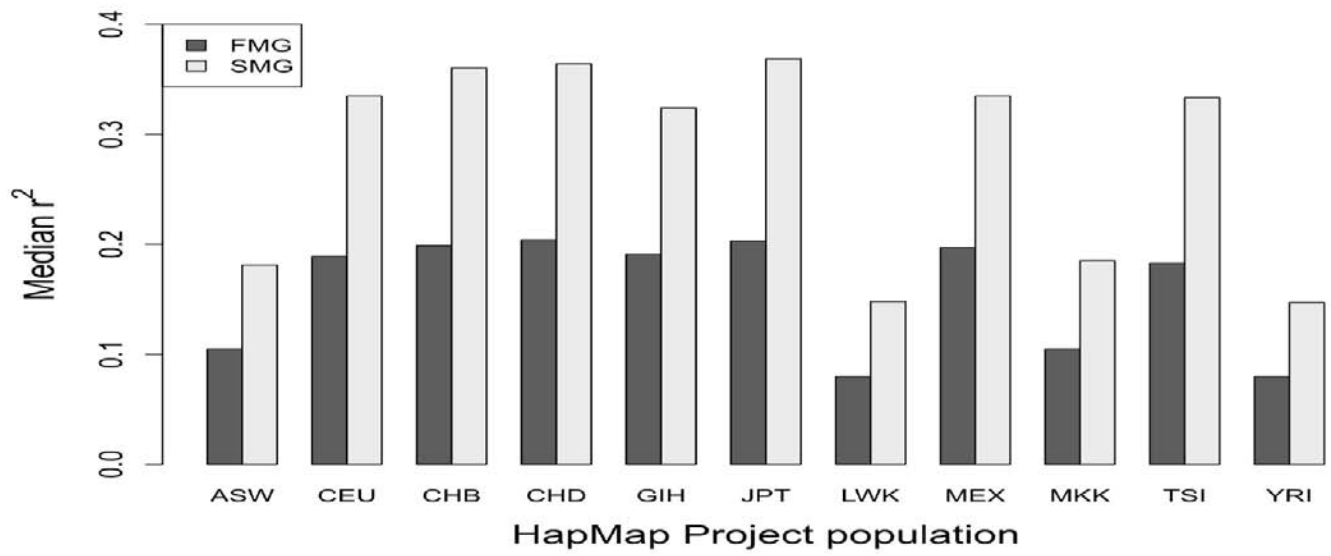

Supplementary Figure S11-7: The bar plots of the SM genes against the FM genes in the LD coefficient  $r^2$  for each of the 11 populations of HapMap Project.

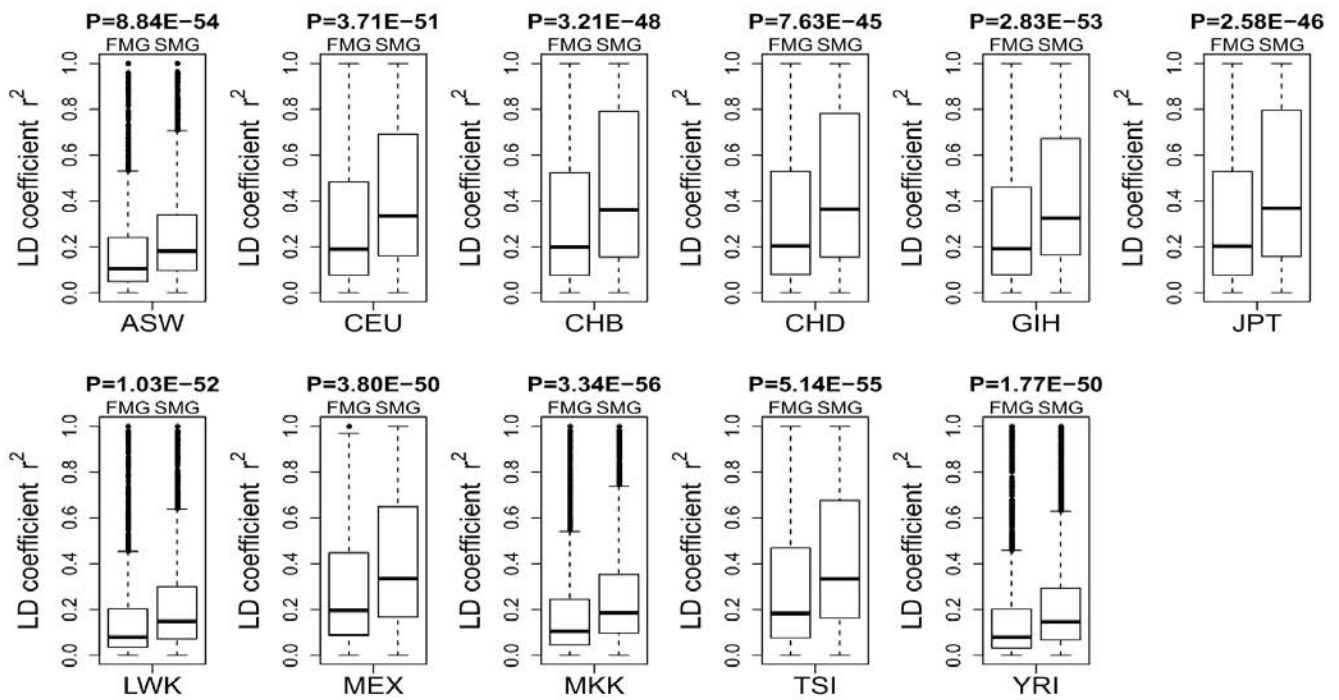

Supplementary Figure S11-8: The box plots of the SM genes against the FM genes in the LD coefficient  $r^2$  for each of the 11 populations of HapMap Project.



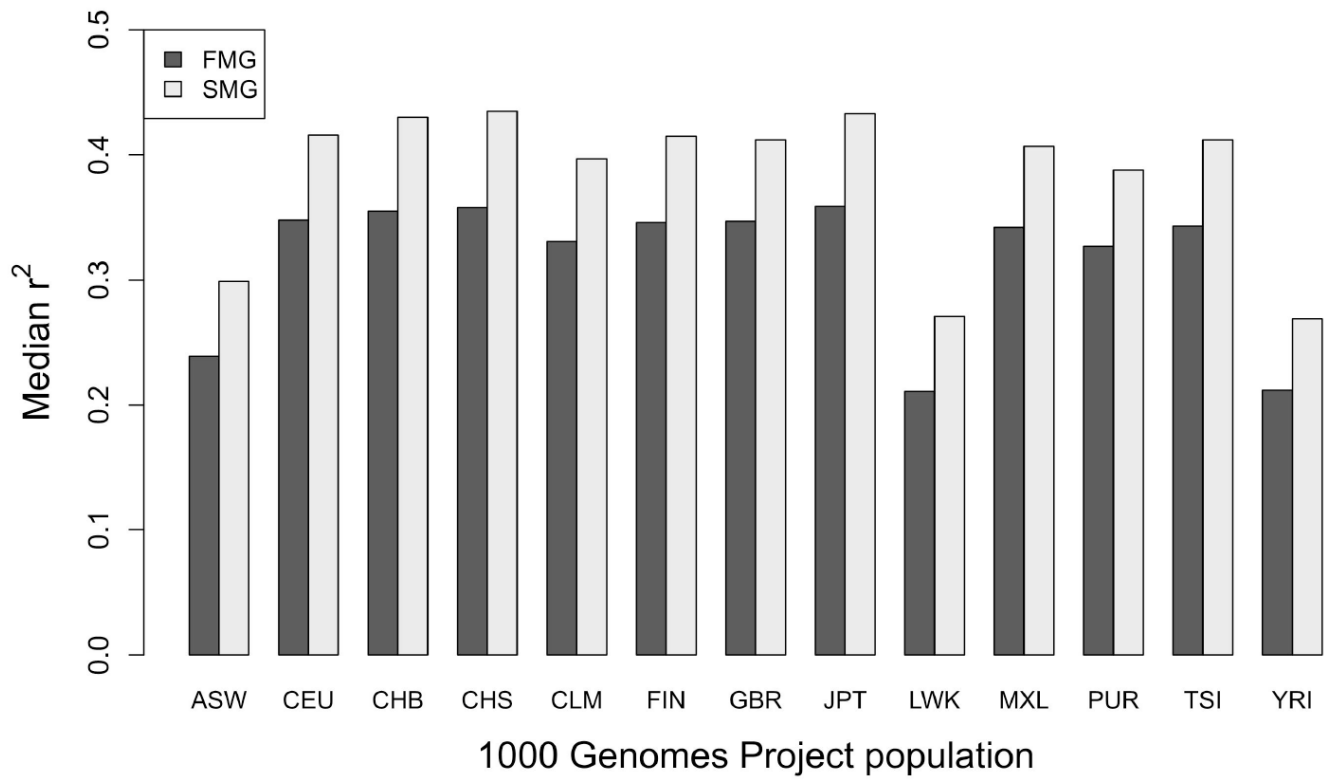

Supplementary Figure S11-9: The bar plots of the SM genes against the FM genes in the LD coefficient  $r^2$  for each of the 13 populations of 1000 Genomes Project.

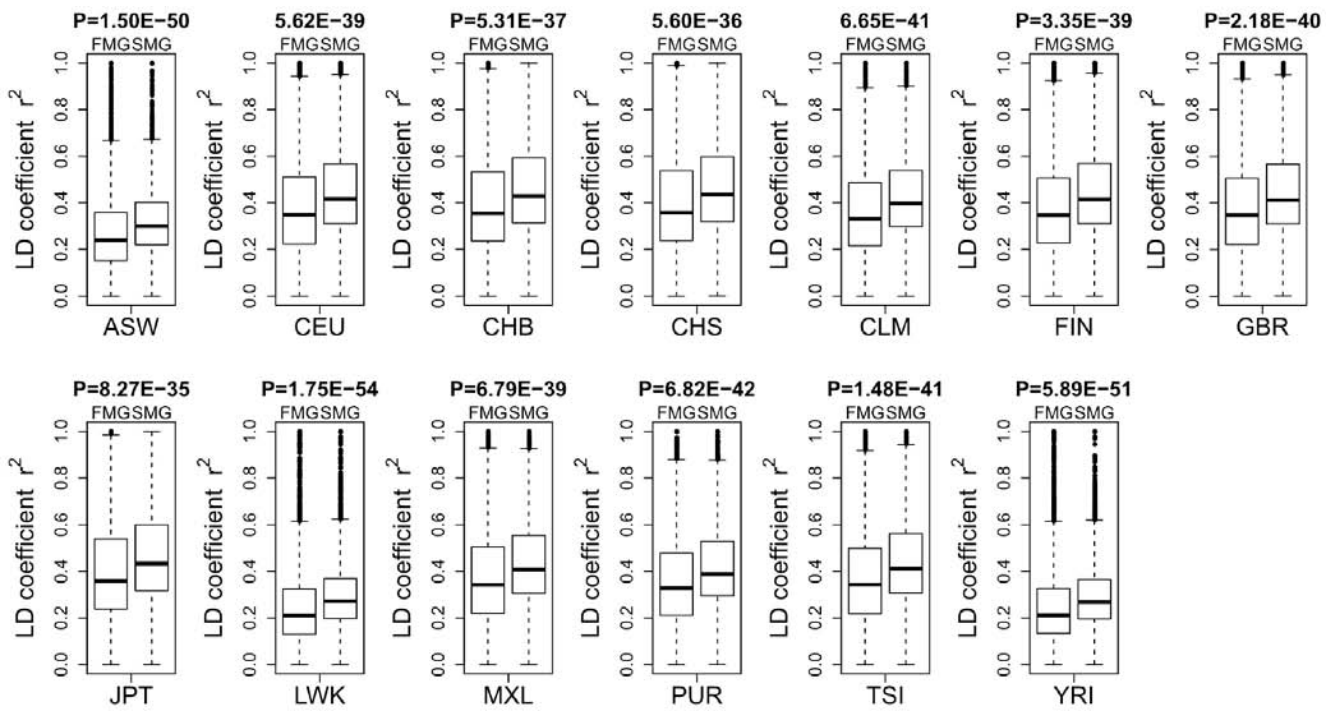

Supplementary Figure S11-10: The box plots of the SM genes against the FM genes in the LD coefficient  $r^2$  for each of the 13 populations of 1000 Genomes Project.

**Supplementary Table S11-1: Summary statistics for the comparisons of dn/ds in 21 species**

**Supplementary Table S11-2: Summary statistics for the comparisons of sequence identity in 21 species**

**Supplementary Table S11-3: Summary statistics for the comparisons of  $r^2$  in HapMap population.**

**Supplementary Table S11-4: Summary statistics for the comparisons of  $r^2$  in 1000 genomes populations**
